# Supplementary material
Source: Royal Society of Chemistry journal article supplement (doi:10.1039/d6qi00383d)
Supplement: d6qi00383d1.pdf [file d6qi00383d1.pdf]

**Supporting information for the manuscript:**

**1D and 2D coordination polymers based on ring-reduced free-base and copper-containing *meso*-tetra(4-pyridyl)porphyrins and  $M^{III}(TMHD)_3$  units ( $M = Dy, Tb$  and  $Gd$ ; TMHD: 2,2,6,6-tetramethyl-3,5-heptanedionate).**

Dmitry I. Nazarov,<sup>a</sup> Ilya A. Yakushev,<sup>b</sup> Alexey V. Kuzmin,<sup>c</sup> Maxim A. Faraonov,<sup>a</sup> Alexander F. Shestakov,<sup>a</sup> Salavat S. Khasanov,<sup>c</sup> Akihiro Otsuka,<sup>d</sup> Hiroshi Kitagawa<sup>d</sup> and Dmitri V. Konarev\*<sup>a</sup>

<sup>a</sup>Federal Research Center of Problems of Chemical Physics and Medicinal Chemistry RAS, Chernogolovka, Moscow region, 142432 Russia;

<sup>b</sup>Kurnakov Institute of General and Inorganic Chemistry, RAS, Moscow, 119991 Russia;

<sup>c</sup>Institute of Solid State Physics RAS, Chernogolovka, Moscow region, 142432 Russia;

<sup>d</sup>Division of Chemistry, Graduate School of Science, Kyoto University, Sakyo-ku, Kyoto 606-8502, Japan

**Table S1.** IR-spectra ( $\text{cm}^{-1}$ ) of starting macrocycle and polymers **1-4** measured in KBr pellets.

| Components          | H <sub>2</sub> TPyP       | Ln(TMHD) <sub>3</sub> | crypt | CuTPyP | 1<br>H <sub>2</sub> TPyP | 2<br>CuTPyP | 3<br>H <sub>2</sub> TPyP | 4<br>H <sub>2</sub> TPyP |        |
|---------------------|---------------------------|-----------------------|-------|--------|--------------------------|-------------|--------------------------|--------------------------|--------|
| H <sub>2</sub> TPyP | 413w                      |                       |       | 443w   | 428w                     | -           | -                        | -                        |        |
|                     | -                         |                       |       | 532w   | 454w                     | -           | -                        | -                        |        |
|                     | 531m                      |                       |       | 574w   | -                        | -           | -                        | -                        |        |
|                     | 555m                      |                       |       | 667m   | -                        | -           | -                        | -                        |        |
|                     | 565m                      |                       |       | 682m   | 669w                     | 669w        | 666w                     | 667w                     |        |
|                     | 659s                      |                       |       | 717m   | -                        | 717w        | -                        | -                        |        |
|                     | 723s                      |                       |       | 795s   | 792m*                    | 794m*       | 792m*                    | 791m*                    |        |
|                     | 785s                      |                       |       | 854w   | -                        | 869m        | 848w                     | 847w                     |        |
|                     | 800s                      |                       |       | 873w   | -                        | 887w        | 881w                     | 880w                     |        |
|                     | 842m                      |                       |       | 891w   | 889w                     | 1003m       | -                        | -                        |        |
|                     | 882s                      |                       |       | 1001s  | 971w                     | 1025w*      | -                        | -                        |        |
|                     | 971s                      |                       |       | 1026w  | -                        | 1069m*      | 1012w                    | 1012w                    |        |
|                     | 980m                      |                       |       | 1068m  | 1047m                    | -           | -                        | -                        |        |
|                     | 1004m                     |                       |       | 1080w  | 1072w*                   | -           | 1068m*                   | 1068m*                   |        |
|                     | 1069m                     |                       |       | 1213w  | 1261w                    | 1224m*      | -                        | -                        |        |
|                     | 1082w                     |                       |       | 1261w  | 1358s*                   | 1261w       | 1357s*                   | 1357s*                   |        |
|                     | 1258w                     |                       |       | 1346m  | 1413s                    | 1357s*      | 1413s                    | 1414s                    |        |
|                     | 1351m                     |                       |       | 1404m  | -                        | 1411s*      | -                        | -                        |        |
|                     | 1401s                     |                       |       | 1425m  | 1538m*                   | 1538m*      | 1537m*                   | 1537m*                   |        |
|                     | 1469m                     |                       |       | 1543m  | -                        | 1538m*      | -                        | -                        |        |
|                     | 1542m                     |                       |       | 1593s  | 1590s                    | 1591s       | 1589s                    | 1589s                    |        |
|                     | 1557w                     |                       |       |        | -                        | -           | -                        | -                        |        |
|                     | 1594s                     |                       |       |        | 472m*                    | -           | -                        | -                        |        |
|                     | Ln<br>(TMHD) <sub>3</sub> |                       | 409m  |        | 604w                     | 604w        | -                        | 474m*                    | 473m*  |
|                     |                           |                       | 474s  |        | 736w*                    | 736w*       | -                        | 603w                     | 603w   |
|                     |                           |                       | 601m  |        | 755w                     | 755w        | 474m*                    | 737w*                    | 735w*  |
|                     |                           |                       | 737m  |        | 792m*                    | 792m*       | 605w                     | 753w                     | 751w   |
|                     |                           |                       | 763m  |        | 737m                     | 869m        | 737w*                    | 792m*                    | 791m*  |
|                     |                           |                       | 794m  |        | 763m                     | -           | 757w                     | 868m                     | 868m   |
|                     |                           |                       | 867s  |        | 794m                     | -           | 794m*                    | -                        | -      |
|                     |                           |                       | 935w  |        | 867s                     | 1020w       | 869m                     | 944m*                    | 944m*  |
|                     |                           |                       | 950m  |        | 935w                     | 1139m*      | -                        | -                        | -      |
|                     |                           |                       | 1025w |        | 950m                     | 1179m       | 942w*                    | 1139m*                   | 1138m* |
|                     |                           |                       | 1130s |        | 1025w                    | 1226m       | 1025w*                   | 1180m                    | 1180m  |
|                     |                           |                       | 1181m |        | 1130s                    | 1245w       | 1140m*                   | 1226w                    | 1225w  |
|                     |                           |                       | 1224m |        | 1181m                    | 1287w*      | 1178m                    | 1245w                    | 1245w  |
|                     |                           |                       | 1247w |        | 1224m                    | 1358s*      | 1224m*                   | 1282w                    | 1283w  |
|                     |                           |                       | 1279m |        | 1247w                    | 1388w       | 1245w                    | 1357s*                   | 1357s* |
|                     |                           | 1353s                 |       | 1279m  | -                        | 1284w       | 1387w                    | 1387w                    |        |
|                     |                           | 1382s                 |       | 1353s  | 1452m*                   | 1357s*      | -                        | -                        |        |
|                     |                           | 1399m                 |       | 1382s  | 1505s                    | 1388w       | 1451m*                   | 1451m*                   |        |
|                     |                           | 1452m                 |       | 1399m  | 1538m*                   | 1411s*      | 1505s                    | 1505s                    |        |
|                     |                           | 1504s                 |       | 1452m  | -                        | 1451m*      | 1538m*                   | 1537m*                   |        |
|                     |                           | 1541m                 |       | 1504s  | 1575s                    | 1506s       | -                        | -                        |        |
|                     |                           | 1551m                 |       | 1541m  | -                        | 1538m*      | 1575s                    | 1575s                    |        |
|                     |                           | 1574vs                |       | 1551m  | 2873m*                   | -           | -                        | -                        |        |
|                     |                           | 1580vs                |       | 1574vs | 2902w                    | 1574s       | 2869m                    | 2865m                    |        |
|                     |                           | 2865w                 |       | 1580vs | 2962m                    | -           | 2900w                    | 2900w                    |        |
|                     |                           | 2906w                 |       | 2865w  | -                        | 2865m       | 2952m                    | 2952m                    |        |
|                     |                           | 2952m                 |       | 2906w  | 472m*                    | 2902w       | -                        | -                        |        |
| crypt               |                           |                       | 2952m | 476w   | 736w*                    | 2957m       | 474m*                    | 473m*                    |        |
|                     |                           |                       |       | 735m*  | -                        | -           | 737w*                    | 735w*                    |        |
|                     |                           |                       |       | 922m   | -                        | 474m*       | -                        | -                        |        |
|                     |                           |                       |       | 948w   | -                        | 737w*       | 944m*                    | 944m*                    |        |
|                     |                           |                       |       | 982m   | 1072w*                   | -           | 990w                     | 990w                     |        |
|                     |                           |                       |       | 1071m  | 1105m                    | 1105m       | 942w*                    | 1068m*                   | 1068m* |
|                     |                           |                       |       | 1100s  | 982m                     | 1139m*      | -                        | 1109m                    | 1108m  |
|                     |                           |                       |       | 1127s  | 1071m                    | 1287w*      | 1069m*                   | 1139m*                   | 1138m* |
|                     |                           |                       |       | 1295m  | 1100s                    | -           | 1106m                    | -                        | -      |
|                     |                           |                       |       | 1329m  | 1127s                    | 1358s*      | 1140m*                   | 1298w                    | -      |
|                     |                           |                       |       | 1360s  | 1295m                    | 1452m*      | -                        | 1357s*                   | 1357s* |
|                     |                           |                       | 1446m | 1329m  | -                        | -           | 1451m*                   | 1451m*                   |        |
|                     |                           |                       | 1462m | 1360s  | 2873m*                   | 1357s*      | -                        | -                        |        |
|                     |                           |                       | 2877w | 1446m  | -                        | 1451m*      | -                        | -                        |        |
|                     |                           |                       |       | 1462m  | -                        | -           | -                        | -                        |        |
|                     |                           |                       |       | 2877w  | -                        | -           | -                        | -                        |        |

\* - bands are coincided; w – weak, m –middle and s – strong intensity

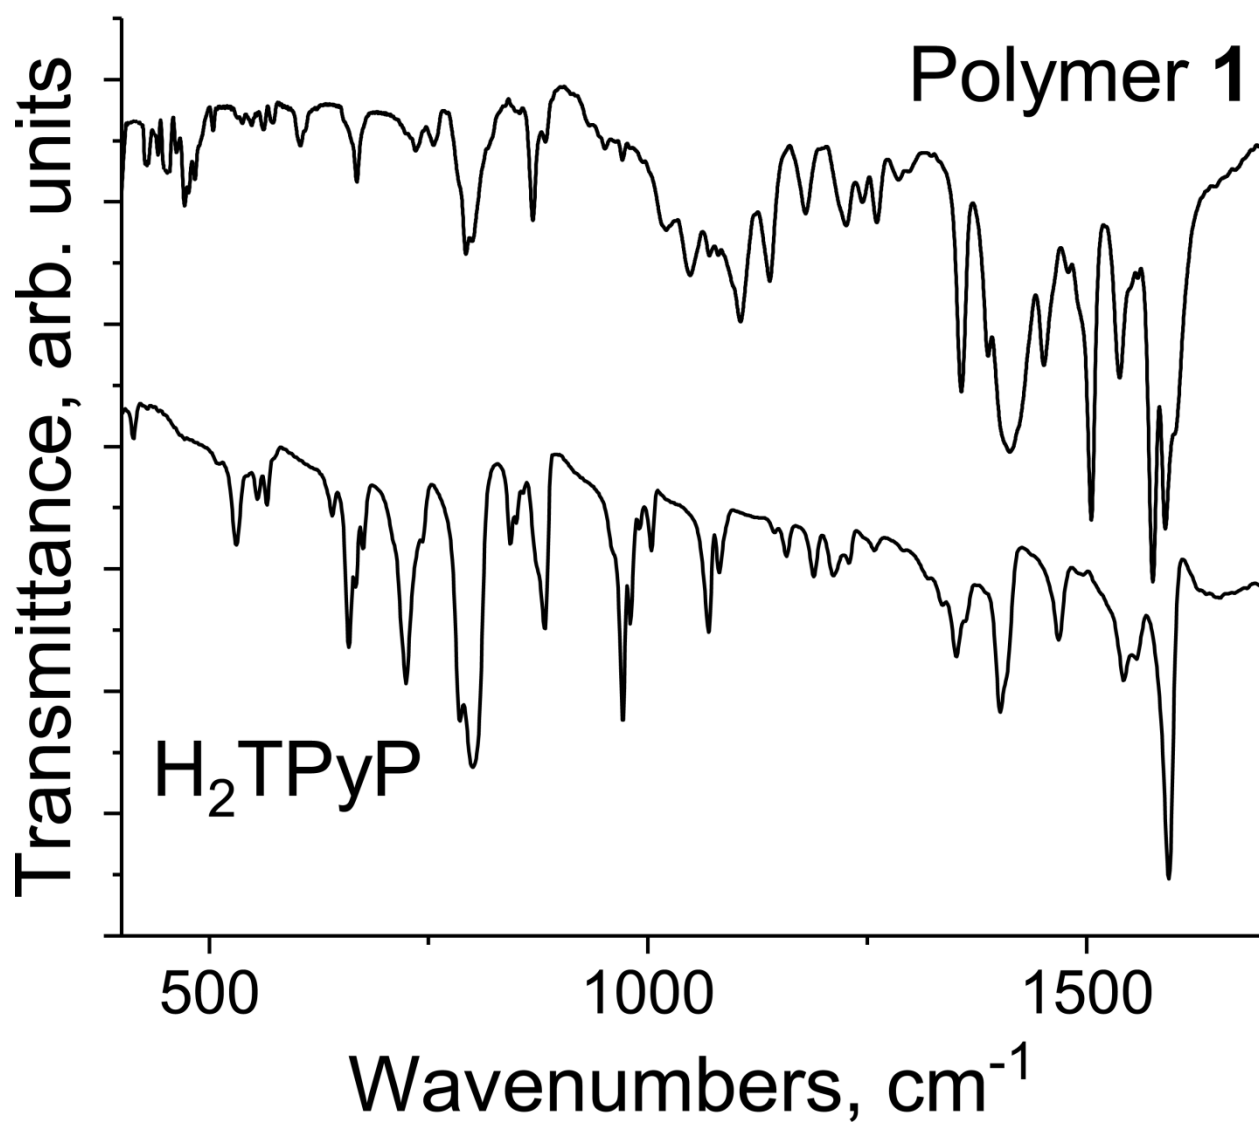

**Figure S1.** IR spectra of starting H<sub>2</sub>TPyP porphyrin and salt **1** in KBr pellets. Pellet for **1** was prepared in anaerobic condition.

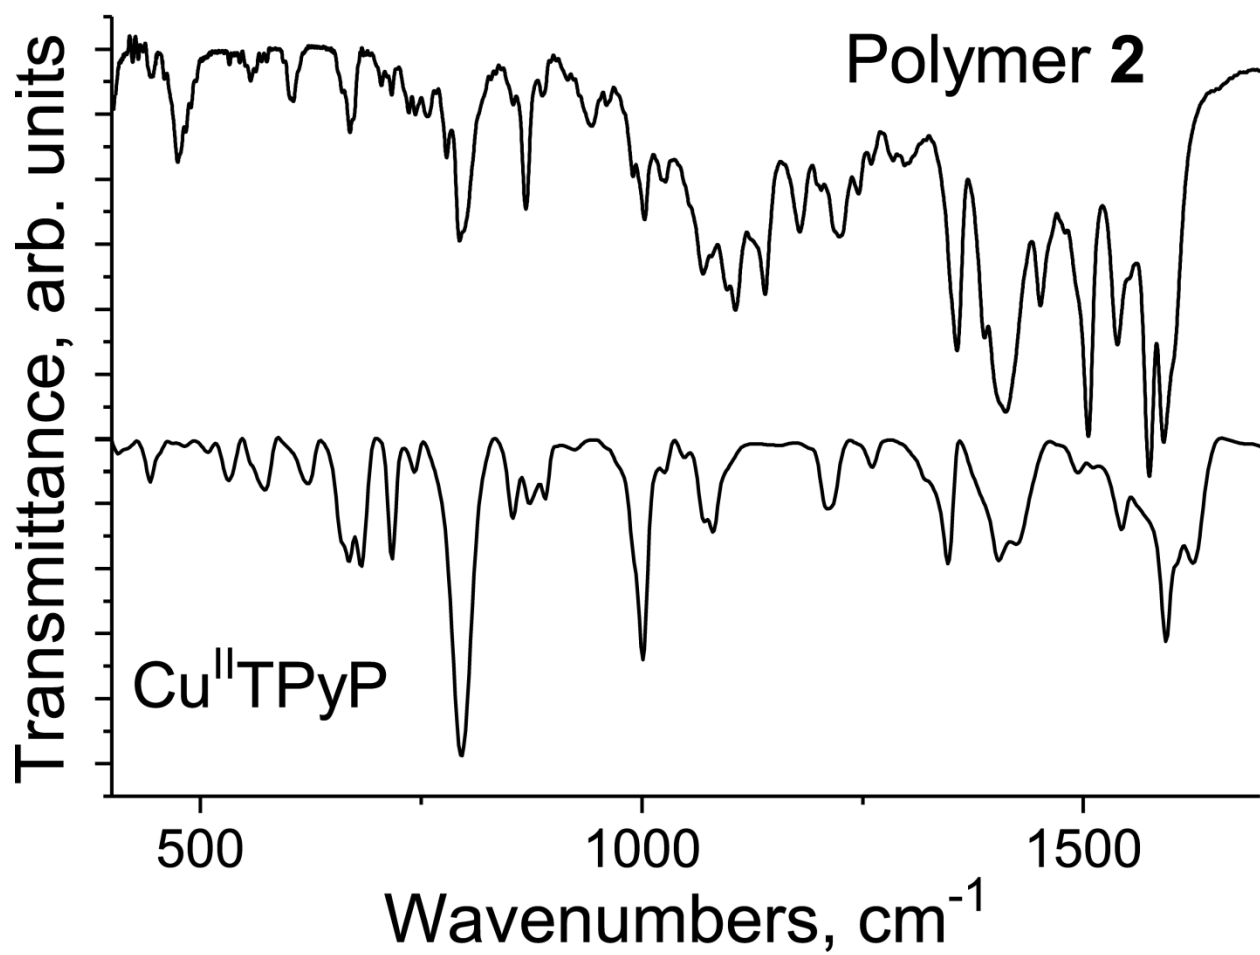

**Figure S2.** IR spectra of starting Cu<sup>II</sup>TPyP porphyrin and salt **2** in KBr pellets. Pellet for **2** was prepared in anaerobic condition.

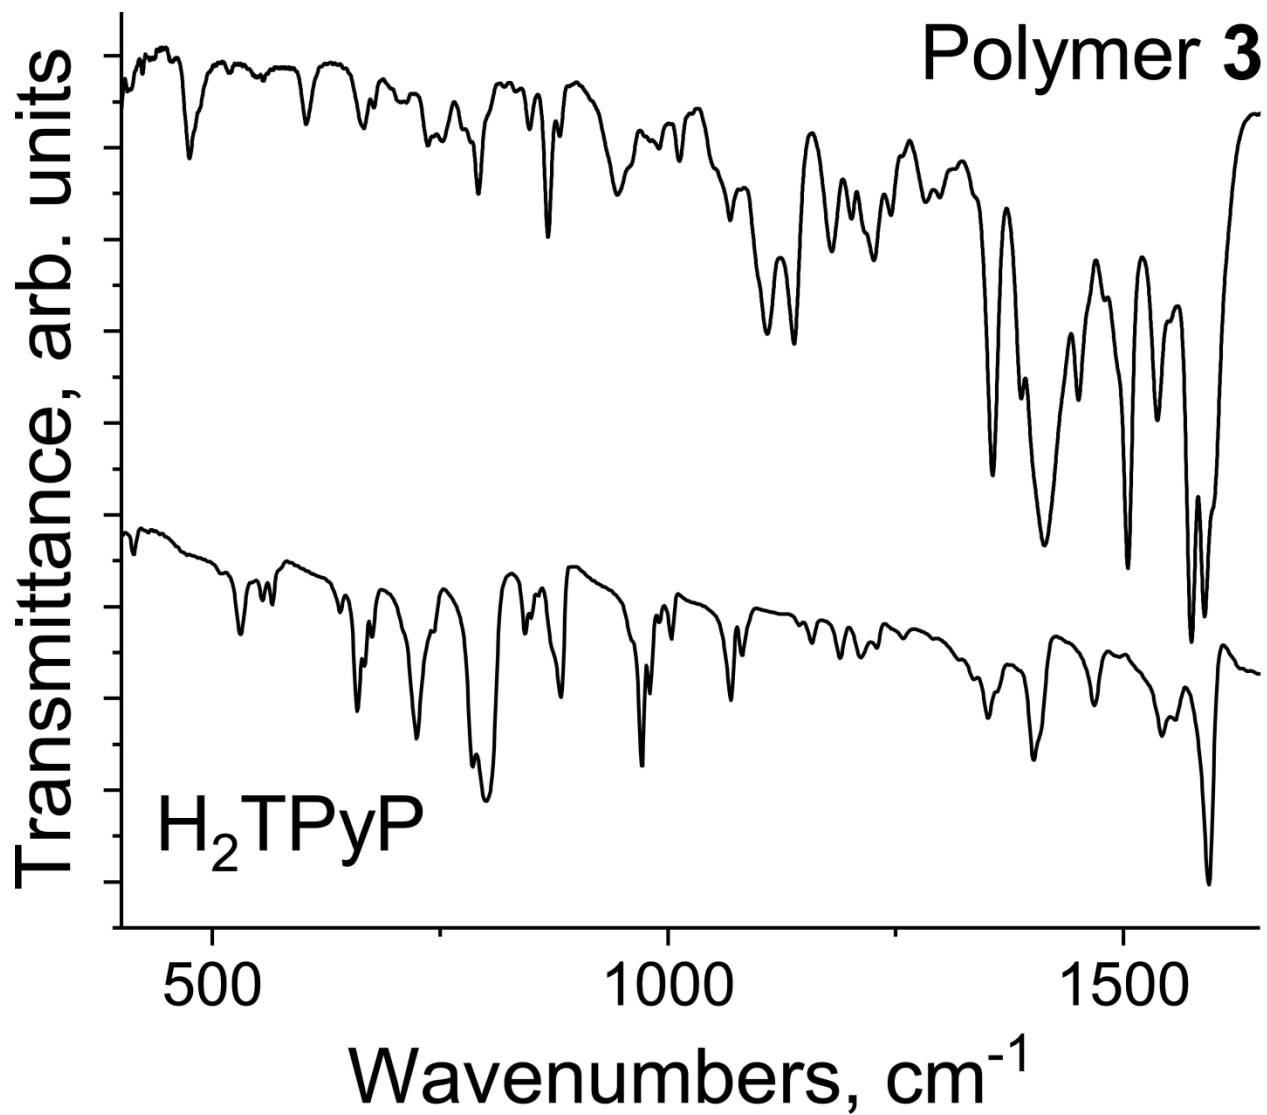

**Figure S3.** IR spectra of starting H<sub>2</sub>TPyP porphyrin and salt **3** in KBr pellets. Pellet for **3** was prepared in anaerobic condition.

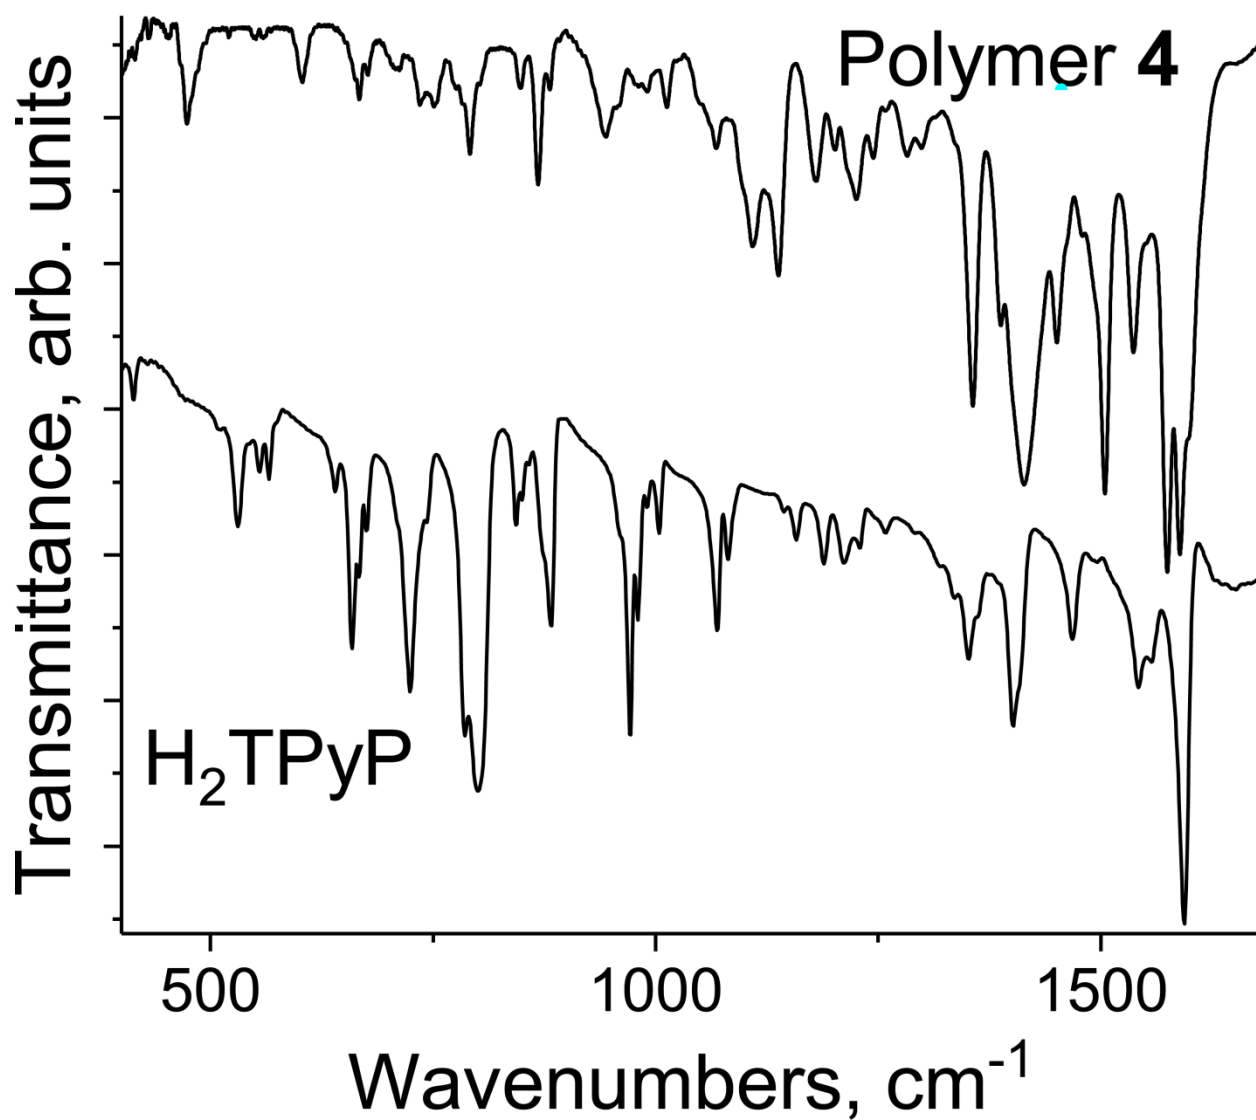

**Figure S4.** IR spectra of starting H<sub>2</sub>TPyP porphyrin and salt **4** in KBr pellets. Pellet for **4** was prepared in anaerobic condition.

## Crystal structure

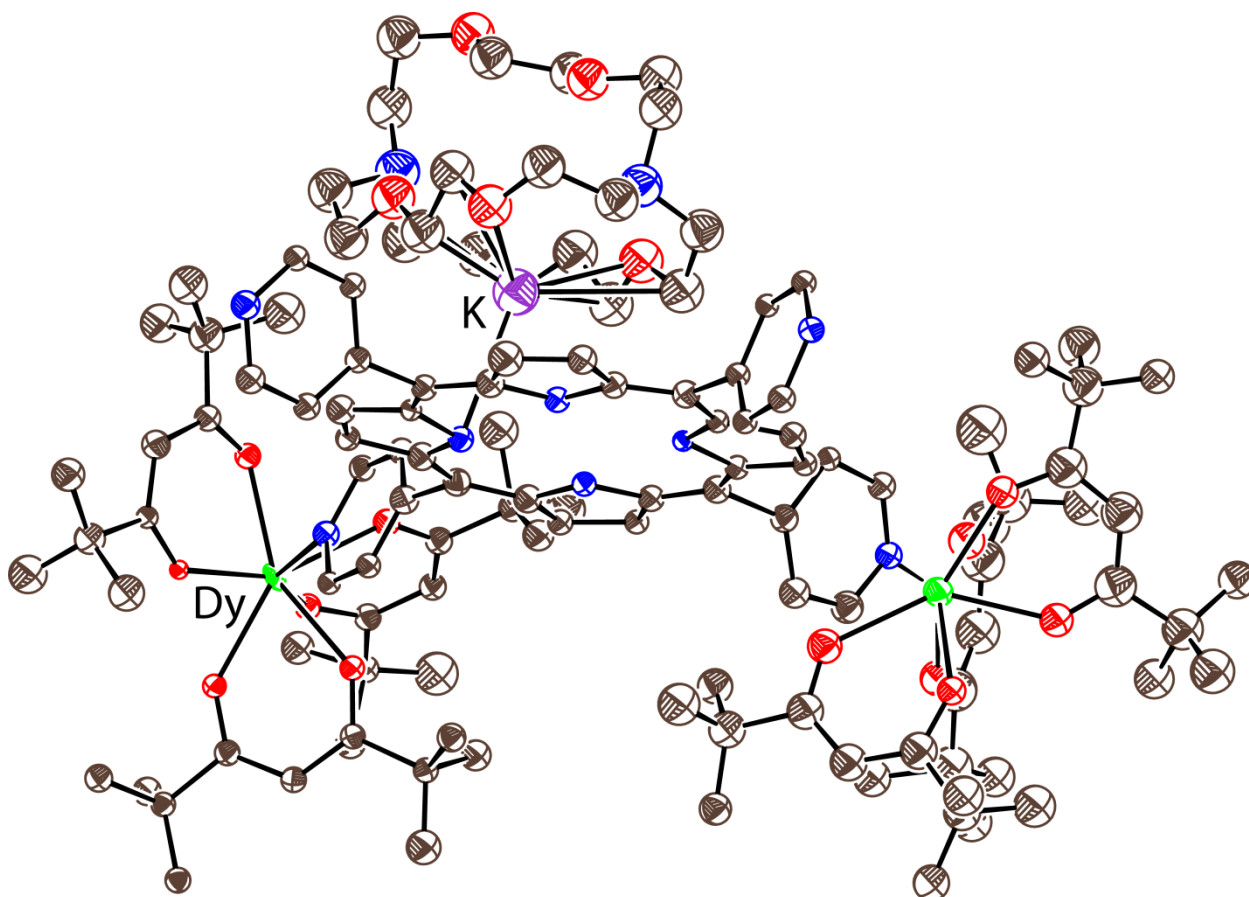

**Figure S5.** Crystallographically independent part and repeating unit of polymer **1**. Solvent *n*-hexane molecules (4 molecules per one crystallographically independent part) are strongly disordered and are squeezed from the crystal structure of **1**. Thermal ellipsoid plot with the 30% probability is shown. All fragments are shown in major orientations.

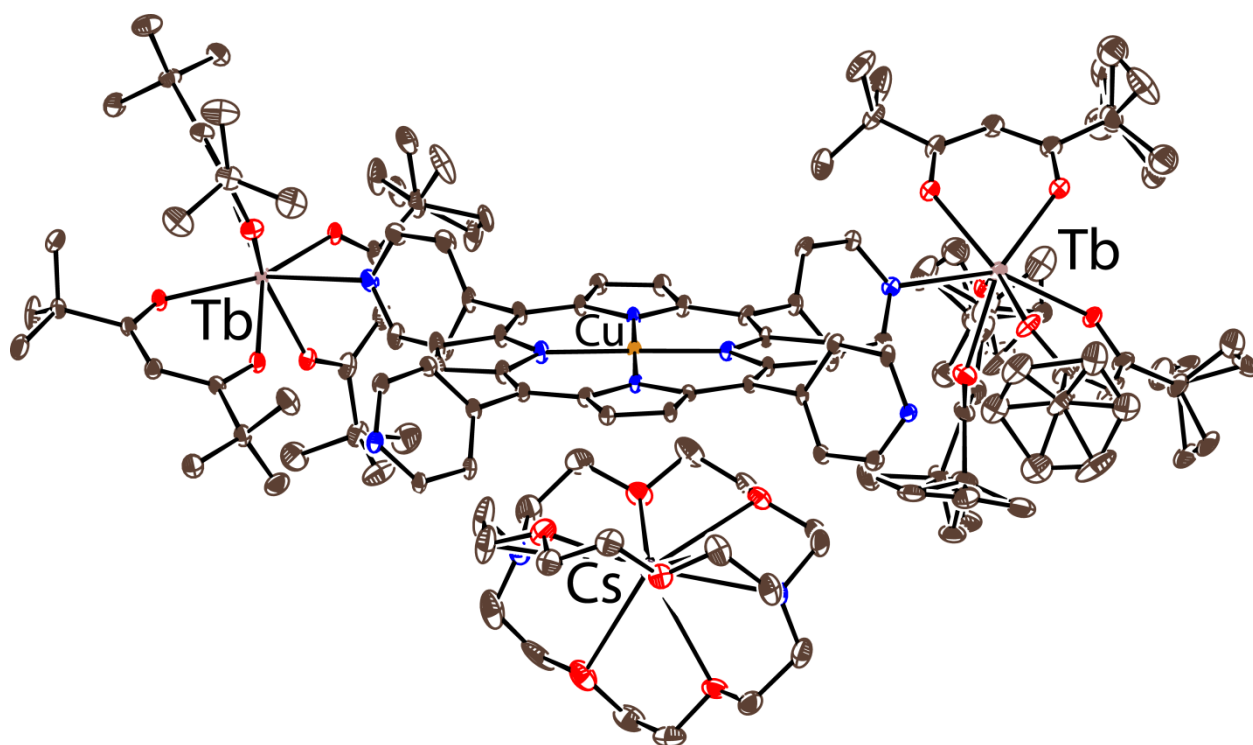

**Figure S6.** Crystallographically independent part and repeating unit of polymer **2**. Solvent *n*-hexane molecules (4 molecules per one crystallographically independent part) are strongly disordered and are squeezed from the crystal structure of **2**. Thermal ellipsoid plot with the 30% probability is shown. Some of *tert*-Bu groups of TMHD are disordered between two orientations.

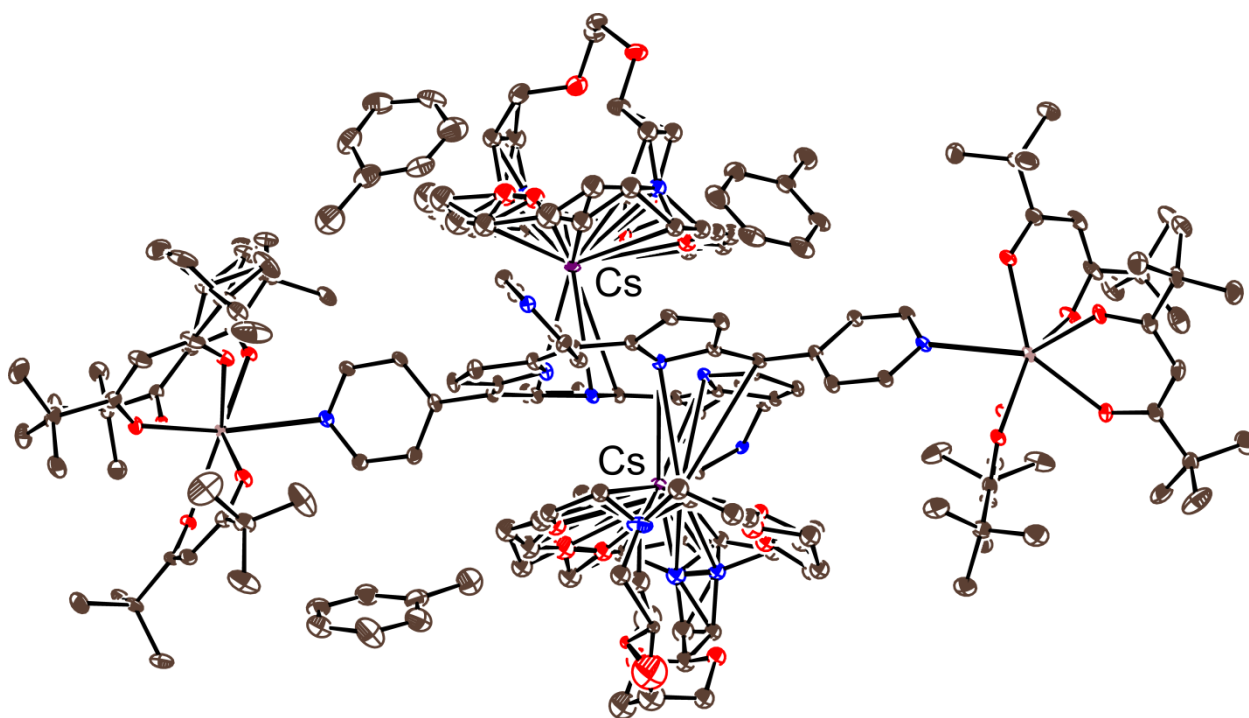

**Figure S7.** Crystallographically independent part and repeating unit of polymer **3**. Thermal ellipsoid plot with the 30% probability is shown. Some of *tert*-Bu groups of TMHD are disordered between two orientations with the 0.59(6)/0.41(6) occupancies. One of three toluene molecules is disordered between two orientations with the 0.503(9)/0.497(9) occupancies. One of two {Crypt(Cs<sup>+</sup>)} cations has two different positions relative to the porphyrin with the 0.701(2)/0.299(2) occupancies. Another {Crypt(Cs<sup>+</sup>)} cation has disordered between two positions -CH<sub>2</sub>-CH<sub>2</sub>-O- fragments (upper cation in figure) with the 0.523(7)/0.477(7) occupancies. .

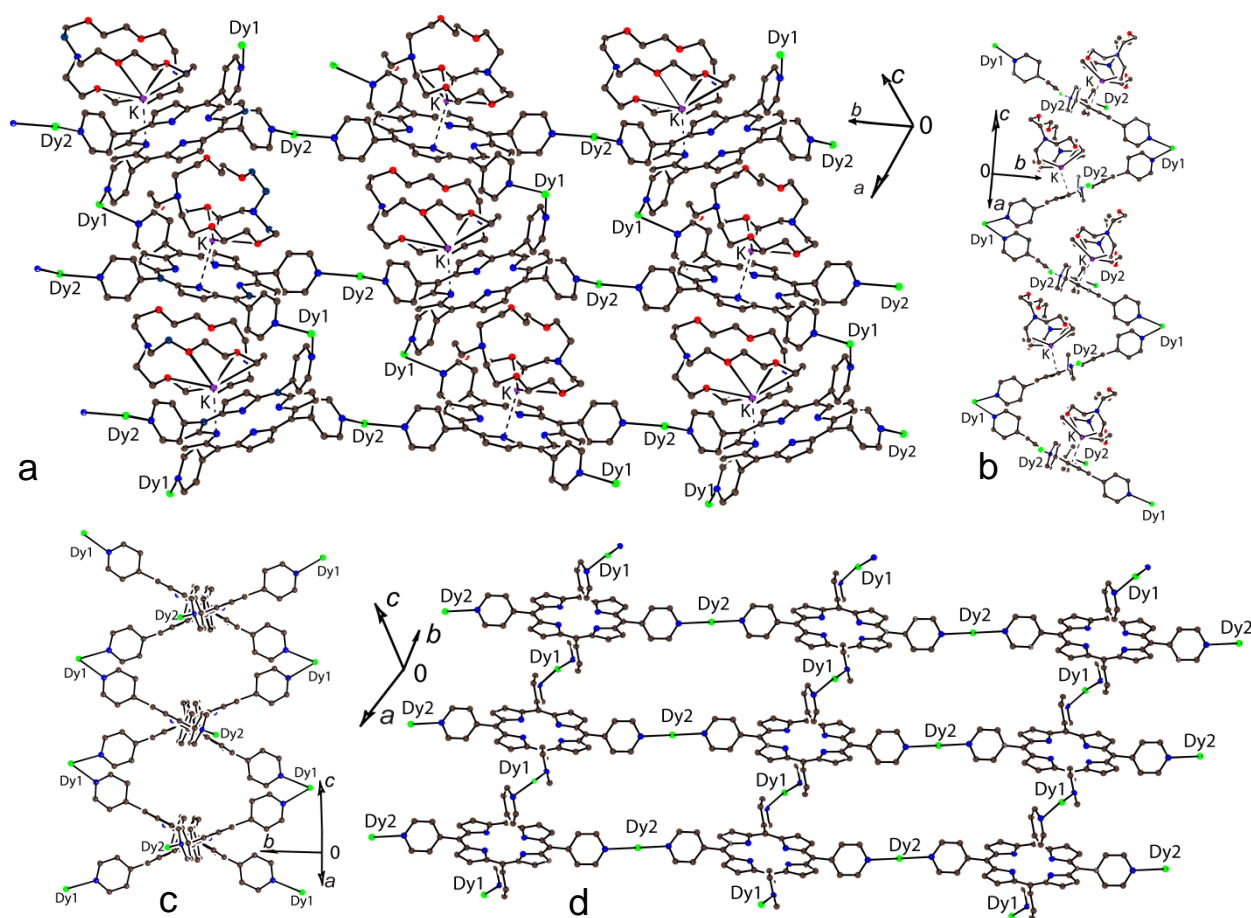

**Fig. S8.** View on the 2D zig-zag polymer formed in **1**: (a) view on the folded 2D polymer and (b) along a zig-zag polymer (only one H<sub>2</sub>TPyP molecule depth is shown); view with the {Crypt(K<sup>+</sup>)} cations whereas bulky TMHD ligands at Dy<sup>III</sup> are not shown. View on the same polymer but without {Crypt(K<sup>+</sup>)} cations: (c) view along a zig-zag polymer (two H<sub>2</sub>TPyP molecules depth is shown); (d) view on the folded 2D polymer.

**Table S2.** Shape analysis of the metal polymer **1** using SHAPE 2.1 software.<sup>1</sup> The smaller value is the closer geometry of the coordination polyhedron of a metal center gets to the perfect one.

### Dy1

|    |          |                                                | Symmetry        | <b>100 K</b> |
|----|----------|------------------------------------------------|-----------------|--------------|
| 1  | OP-8     | Octagon                                        | D <sub>8h</sub> | 29.447       |
| 2  | HPY-8    | Heptagonal pyramid                             | C <sub>7v</sub> | 23.229       |
| 3  | HBPY-8   | Hexagonal bipyramid                            | D <sub>6h</sub> | 16.404       |
| 4  | CU-8     | Cube                                           | O <sub>h</sub>  | 10.540       |
| 5  | SAPR-8   | Square antiprism                               | D <sub>4d</sub> | 0.717        |
| 6  | TDD-8    | Triangular dodecahedron                        | D <sub>2d</sub> | 1.966        |
| 7  | JGBF-8   | Johnson - Gyrobifastigium (J26)                | D <sub>2d</sub> | 13.862       |
| 8  | JETBPY-8 | Johnson - Elongated triangular bipyramid (J14) | D <sub>3h</sub> | 26.088       |
| 9  | JBTP-8   | Johnson - Biaugmented trigonal prism (J50)     | C <sub>2v</sub> | 2.078        |
| 10 | BTPR-8   | Biaugmented trigonal prism                     | C <sub>2v</sub> | 2.068        |
| 11 | JSD-8    | Snub disphenoid (J84)                          | D <sub>2d</sub> | 3.354        |
| 12 | TT-8     | Triakis tetrahedron                            | T <sub>d</sub>  | 11.298       |
| 13 | ETBPY-8  | Elongated trigonal bipyramid                   | D <sub>3h</sub> | 23.288       |

### Dy2

|    |          |                                                | Symmetry        | <b>100 K</b> |
|----|----------|------------------------------------------------|-----------------|--------------|
| 1  | OP-8     | Octagon                                        | D <sub>8h</sub> | 28.941       |
| 2  | HPY-8    | Heptagonal pyramid                             | C <sub>7v</sub> | 23.189       |
| 3  | HBPY-8   | Hexagonal bipyramid                            | D <sub>6h</sub> | 16.455       |
| 4  | CU-8     | Cube                                           | O <sub>h</sub>  | 9.697        |
| 5  | SAPR-8   | Square antiprism                               | D <sub>4d</sub> | 0.546        |
| 6  | TDD-8    | Triangular dodecahedron                        | D <sub>2d</sub> | 2.689        |
| 7  | JGBF-8   | Johnson - Gyrobifastigium (J26)                | D <sub>2d</sub> | 15.914       |
| 8  | JETBPY-8 | Johnson - Elongated triangular bipyramid (J14) | D <sub>3h</sub> | 27.095       |
| 9  | JBTP-8   | Johnson - Biaugmented trigonal prism (J50)     | C <sub>2v</sub> | 2.528        |
| 10 | BTPR-8   | Biaugmented trigonal prism                     | C <sub>2v</sub> | 2.649        |
| 11 | JSD-8    | Snub disphenoid (J84)                          | D <sub>2d</sub> | 4.807        |
| 12 | TT-8     | Triakis tetrahedron                            | T <sub>d</sub>  | 10.475       |
| 13 | ETBPY-8  | Elongated trigonal bipyramid                   | D <sub>3h</sub> | 24.132       |

**Table S3.** Shape analysis of the metal polymer **2** using SHAPE 2.1 software.<sup>1</sup> The smaller value is the closer geometry of the coordination polyhedron of a metal center gets to the perfect one.

### Tb1

|    |          |                                                | Symmetry        | 100 K  |
|----|----------|------------------------------------------------|-----------------|--------|
| 1  | OP-8     | Octagon                                        | D <sub>8h</sub> | 29.090 |
| 2  | HPY-8    | Heptagonal pyramid                             | C <sub>7v</sub> | 22.890 |
| 3  | HBPY-8   | Hexagonal bipyramid                            | D <sub>6h</sub> | 16.653 |
| 4  | CU-8     | Cube                                           | O <sub>h</sub>  | 9.946  |
| 5  | SAPR-8   | Square antiprism                               | D <sub>4d</sub> | 0.607  |
| 6  | TDD-8    | Triangular dodecahedron                        | D <sub>2d</sub> | 1.950  |
| 7  | JGBF-8   | Johnson - Gyrobifastigium (J26)                | D <sub>2d</sub> | 15.101 |
| 8  | JETBPY-8 | Johnson - Elongated triangular bipyramid (J14) | D <sub>3h</sub> | 25.911 |
| 9  | JBTP-8   | Johnson - Biaugmented trigonal prism (J50)     | C <sub>2v</sub> | 1.987  |
| 10 | BTPR-8   | Biaugmented trigonal prism                     | C <sub>2v</sub> | 1.793  |
| 11 | JSD-8    | Snub disphenoid (J84)                          | D <sub>2d</sub> | 4.339  |
| 12 | TT-8     | Triakis tetrahedron                            | T <sub>d</sub>  | 10.782 |
| 13 | ETBPY-8  | Elongated trigonal bipyramid                   | D <sub>3h</sub> | 23.516 |

### Tb2

|    |          |                                                | Symmetry        | 100 K  |
|----|----------|------------------------------------------------|-----------------|--------|
| 1  | OP-8     | Octagon                                        | D <sub>8h</sub> | 28.536 |
| 2  | HPY-8    | Heptagonal pyramid                             | C <sub>7v</sub> | 23.580 |
| 3  | HBPY-8   | Hexagonal bipyramid                            | D <sub>6h</sub> | 16.451 |
| 4  | CU-8     | Cube                                           | O <sub>h</sub>  | 9.552  |
| 5  | SAPR-8   | Square antiprism                               | D <sub>4d</sub> | 0.394  |
| 6  | TDD-8    | Triangular dodecahedron                        | D <sub>2d</sub> | 2.396  |
| 7  | JGBF-8   | Johnson - Gyrobifastigium (J26)                | D <sub>2d</sub> | 16.417 |
| 8  | JETBPY-8 | Johnson - Elongated triangular bipyramid (J14) | D <sub>3h</sub> | 27.086 |
| 9  | JBTP-8   | Johnson - Biaugmented trigonal prism (J50)     | C <sub>2v</sub> | 2.062  |
| 10 | BTPR-8   | Biaugmented trigonal prism                     | C <sub>2v</sub> | 5.154  |
| 11 | JSD-8    | Snub disphenoid (J84)                          | D <sub>2d</sub> | 3.789  |
| 12 | TT-8     | Triakis tetrahedron                            | T <sub>d</sub>  | 10.363 |
| 13 | ETBPY-8  | Elongated trigonal bipyramid                   | D <sub>3h</sub> | 23.421 |

**Table S3.** Shape analysis of the metal polymer **3** using SHAPE 2.1 software.<sup>1</sup> The smaller value is the closer geometry of the coordination polyhedron of a metal center gets to the perfect one.

### Tb1

|    |          |                                                | Symmetry        | 100 K  |
|----|----------|------------------------------------------------|-----------------|--------|
| 1  | OP-8     | Octagon                                        | D <sub>8h</sub> | 28.834 |
| 2  | HPY-8    | Heptagonal pyramid                             | C <sub>7v</sub> | 23.646 |
| 3  | HBPY-8   | Hexagonal bipyramid                            | D <sub>6h</sub> | 16.465 |
| 4  | CU-8     | Cube                                           | O <sub>h</sub>  | 9.846  |
| 5  | SAPR-8   | Square antiprism                               | D <sub>4d</sub> | 0.367  |
| 6  | TDD-8    | Triangular dodecahedron                        | D <sub>2d</sub> | 2.176  |
| 7  | JGBF-8   | Johnson - Gyrobifastigium (J26)                | D <sub>2d</sub> | 16.055 |
| 8  | JETBPY-8 | Johnson - Elongated triangular bipyramid (J14) | D <sub>3h</sub> | 28.216 |
| 9  | JBTP-8   | Johnson - Biaugmented trigonal prism (J50)     | C <sub>2v</sub> | 2.677  |
| 10 | BTPR-8   | Biaugmented trigonal prism                     | C <sub>2v</sub> | 2.291  |
| 11 | JSD-8    | Snub disphenoid (J84)                          | D <sub>2d</sub> | 5.017  |
| 12 | TT-8     | Triakis tetrahedron                            | T <sub>d</sub>  | 10.694 |
| 13 | ETBPY-8  | Elongated trigonal bipyramid                   | D <sub>3h</sub> | 24.225 |

### Tb2

|    |          |                                                | Symmetry        | 100 K  |
|----|----------|------------------------------------------------|-----------------|--------|
| 1  | OP-8     | Octagon                                        | D <sub>8h</sub> | 30.325 |
| 2  | HPY-8    | Heptagonal pyramid                             | C <sub>7v</sub> | 23.461 |
| 3  | HBPY-8   | Hexagonal bipyramid                            | D <sub>6h</sub> | 16.099 |
| 4  | CU-8     | Cube                                           | O <sub>h</sub>  | 9.401  |
| 5  | SAPR-8   | Square antiprism                               | D <sub>4d</sub> | 0.662  |
| 6  | TDD-8    | Triangular dodecahedron                        | D <sub>2d</sub> | 1.500  |
| 7  | JGBF-8   | Johnson - Gyrobifastigium (J26)                | D <sub>2d</sub> | 15.873 |
| 8  | JETBPY-8 | Johnson - Elongated triangular bipyramid (J14) | D <sub>3h</sub> | 28.518 |
| 9  | JBTP-8   | Johnson - Biaugmented trigonal prism (J50)     | C <sub>2v</sub> | 2.635  |
| 10 | BTPR-8   | Biaugmented trigonal prism                     | C <sub>2v</sub> | 1.660  |
| 11 | JSD-8    | Snub disphenoid (J84)                          | D <sub>2d</sub> | 4.230  |
| 12 | TT-8     | Triakis tetrahedron                            | T <sub>d</sub>  | 10.192 |
| 13 | ETBPY-8  | Elongated trigonal bipyramid                   | D <sub>3h</sub> | 24.506 |

## Magnetic data.

**Table S4.** Magnetic data obtained by using SQUID magnetometer and EPR spectroscopy for **1-4**.

| Compound | SQUID                                                                                                                                                                                                                                                                       | EPR                                                                                                                                                                                                                                                                                                                                                                                                                                                             |
|----------|-----------------------------------------------------------------------------------------------------------------------------------------------------------------------------------------------------------------------------------------------------------------------------|-----------------------------------------------------------------------------------------------------------------------------------------------------------------------------------------------------------------------------------------------------------------------------------------------------------------------------------------------------------------------------------------------------------------------------------------------------------------|
| <b>1</b> | $\chi_M T$ value is 28.75 emu K/mol at 300 K<br>Magnetization is $11.23 \mu_B N_A$ at 2 K and 50 kOe.                                                                                                                                                                       | EPR signal from Dy(III) is observed below 20 K.<br>13 K, $g_1 = 9.2766$ ( $\Delta H = 41.5$ mT),<br>$g_2 = 5.9359$ ( $\Delta H = 68.6$ mT),<br>$g_3 = 3.5946$ ( $\Delta H = 160.0$ mT)<br>EPR signal from $H_2TPyP^{*-}$<br>207 K, $g_1 = 2.0030$ ( $\Delta H = 0.73$ mT)<br>24K, $g_1 = 2.0017$ ( $\Delta H = 0.72$ mT),<br>$g_2 = 1.9966$ ( $\Delta H = 0.53$ mT)<br>4.2 K, $g_1 = 2.0020$ ( $\Delta H = 0.79$ mT),<br>$g_2 = 1.9966$ ( $\Delta H = 0.51$ mT) |
| <b>2</b> | $\chi_M T$ value is 24.35 emu K/mol at 300 K<br>Magnetization is $12.38 \mu_B N_A$ at 2 K and 50 kOe.                                                                                                                                                                       | EPR signal from $Cu^{II}$<br>100 K, $g_1 = 2.210$ , $A_1 = 20.695$ mT, $g_2 = 1.9916$ .<br>4.2 K, $g_1 = 2.1963$ , $A_1 = 20.750$ mT, $g_2 = 2.0437$ .<br>Signal from Tb(III) is not observed                                                                                                                                                                                                                                                                   |
| <b>3</b> | $\chi_M T$ value is 23.60 emu K/mol at 300 K<br>Magnetization is $10.30 \mu_B N_A$ at 2 K and 50 kOe                                                                                                                                                                        | <b>3</b> is EPR silent in whole studied temperature range                                                                                                                                                                                                                                                                                                                                                                                                       |
| <b>4</b> | $\chi_M T$ value is 15.48 emu K/mol at 300 K<br>Magnetization is $13.86 \mu_B N_A$ at 2 K and 50 kOe<br>Theoretical values are<br>$\chi_M T = 15.55$ emu K/mol at 300 K<br>and magnetization is $13.80 \mu_B N_A$<br>at 2 K and 50 kOe. $D = -0.017$<br>$cm^{-1}$ from EPR. | EPR signal from Gd(III)<br>$g_1 = 2.424$ , $g_2 = 1.750$ , $g_3 = 0.709$ ,<br>$D = -0.017$ $cm^{-1}$ , $E = -0.011$ $cm^{-1}$<br>$H_2TPyP^{2-}$ dianion is EPR silent                                                                                                                                                                                                                                                                                           |

Compound {Cryptand(K<sup>+</sup>)}<sub>2</sub>{H<sub>2</sub>TPyP·[Dy<sup>III</sup>(TMHD)<sub>3</sub>]<sub>2</sub>}<sup>-</sup>·3C<sub>6</sub>H<sub>14</sub> (1)

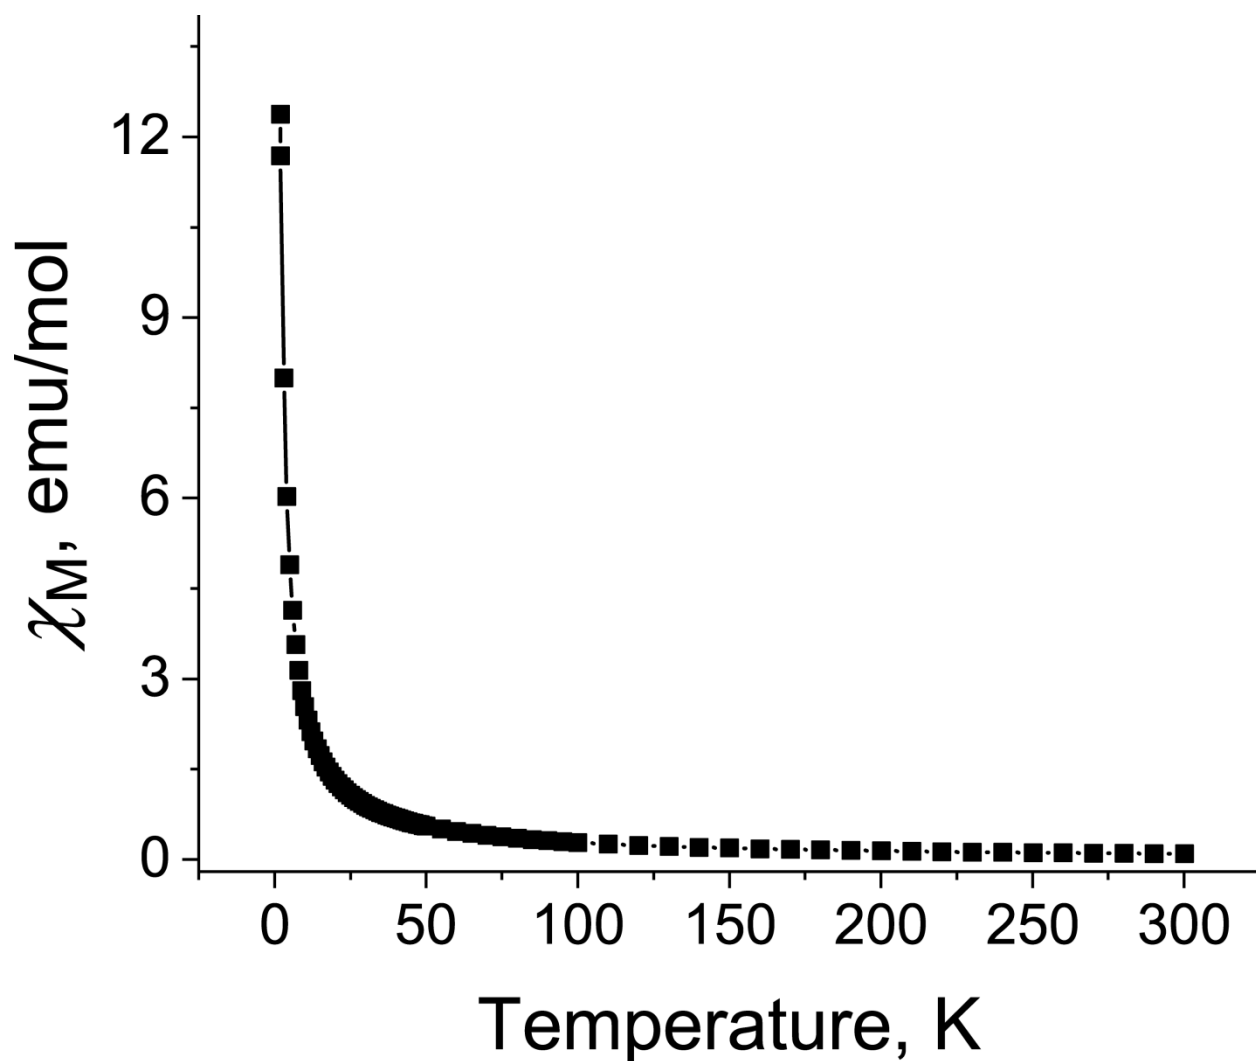

**Figure S9.** Temperature dependence for molar magnetic susceptibility of polycrystalline **1** in the 1.9-300 K range after the subtraction of temperature independent contribution.

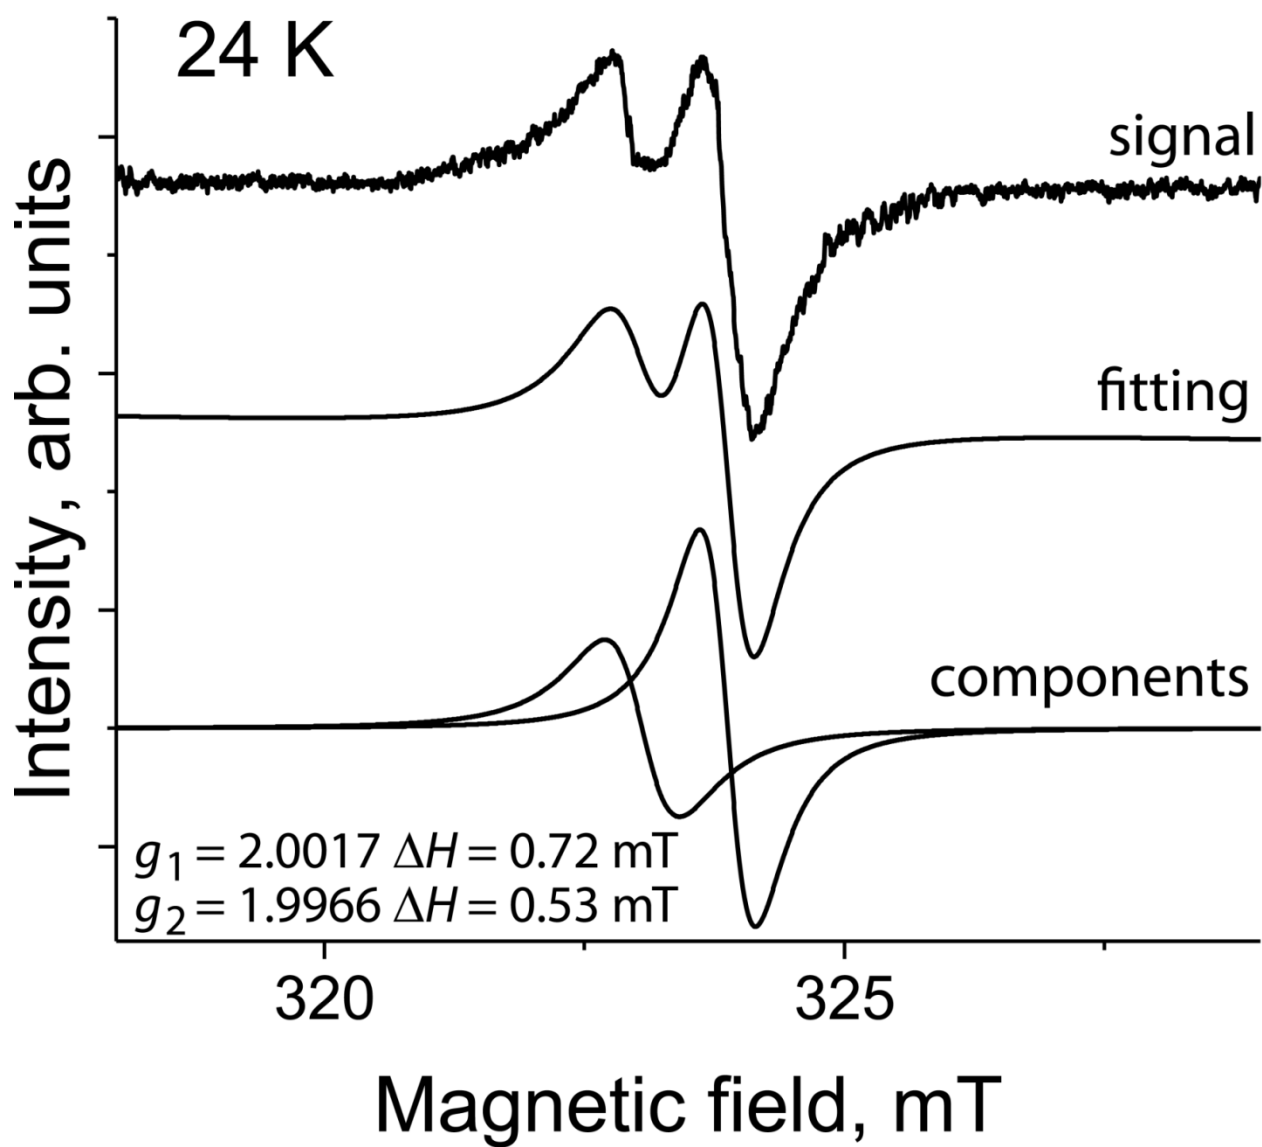

**Fig. S10.** EPR spectrum of polycrystalline **1** at 24 K. Below fitting of the signal by two Lorentzian components is shown (parameters of components are given)

Compound {Cryptand(Cs<sup>+</sup>)}{CuTPyP·[Tb<sup>III</sup>(TMHD)<sub>3</sub>]<sub>2</sub>}<sup>2-</sup>·3C<sub>6</sub>H<sub>14</sub> (2).

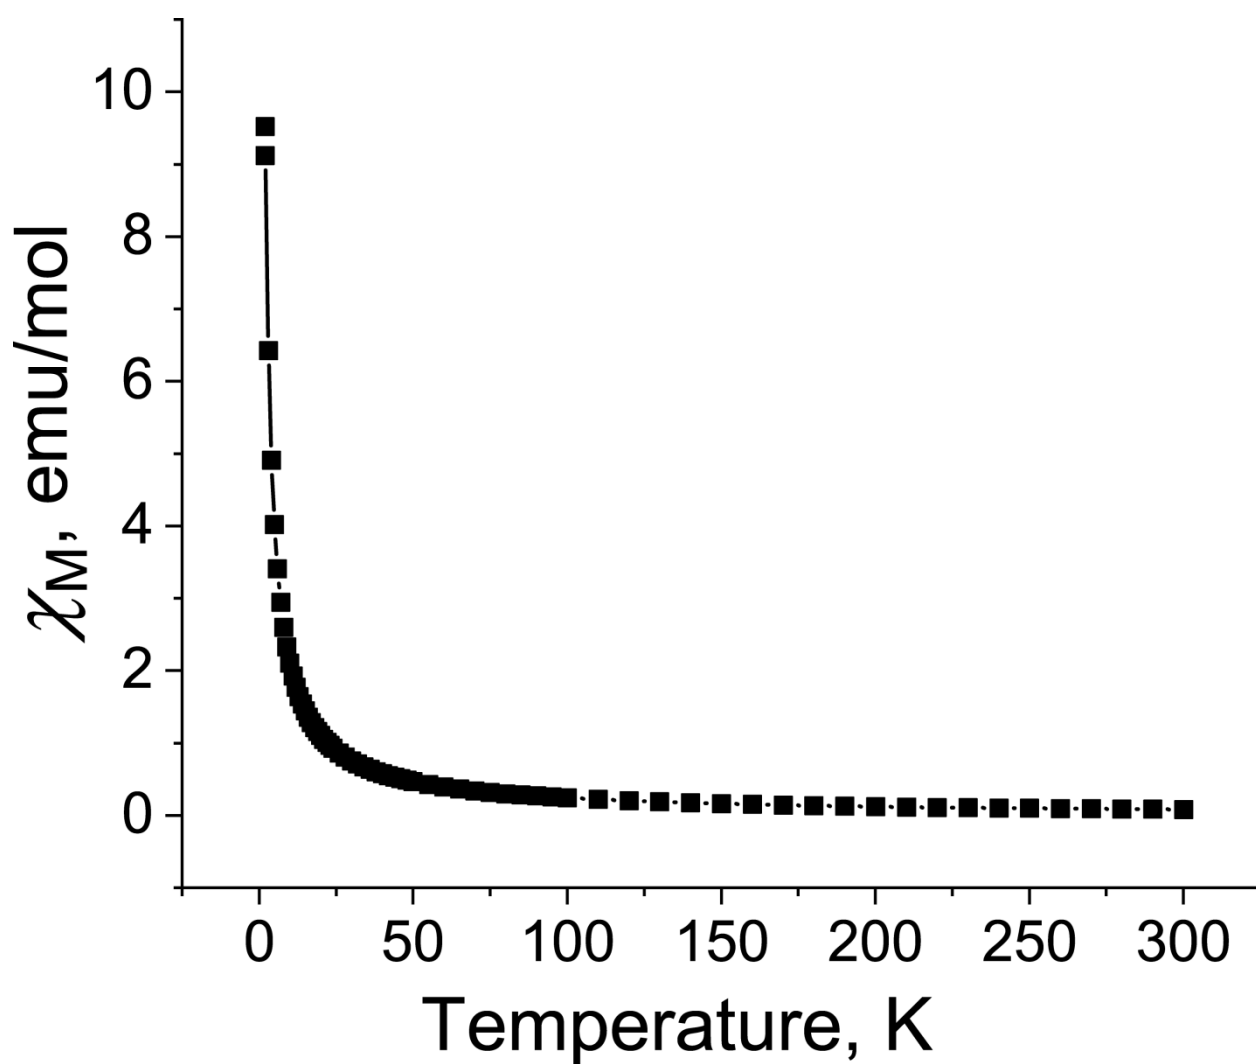

**Figure S11.** Temperature dependence for molar magnetic susceptibility of polycrystalline **2** in the 1.9-300 K range after the subtraction of temperature independent contribution.

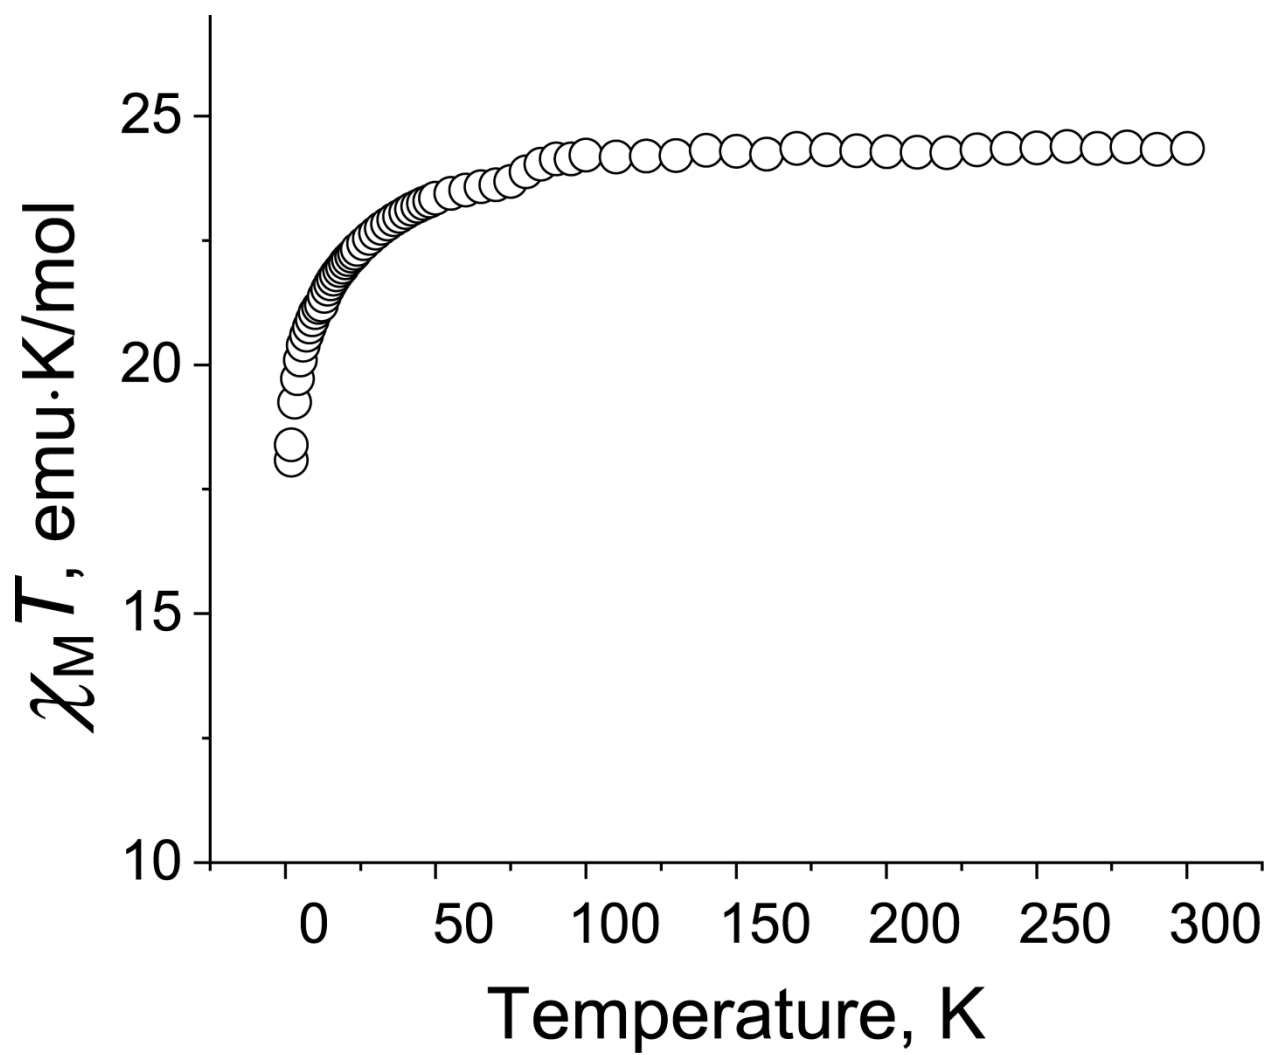

**Fig. S12.** Temperature dependence of the  $\chi_M T$  values for polycrystalline **2** in the 1.9-300 K range.

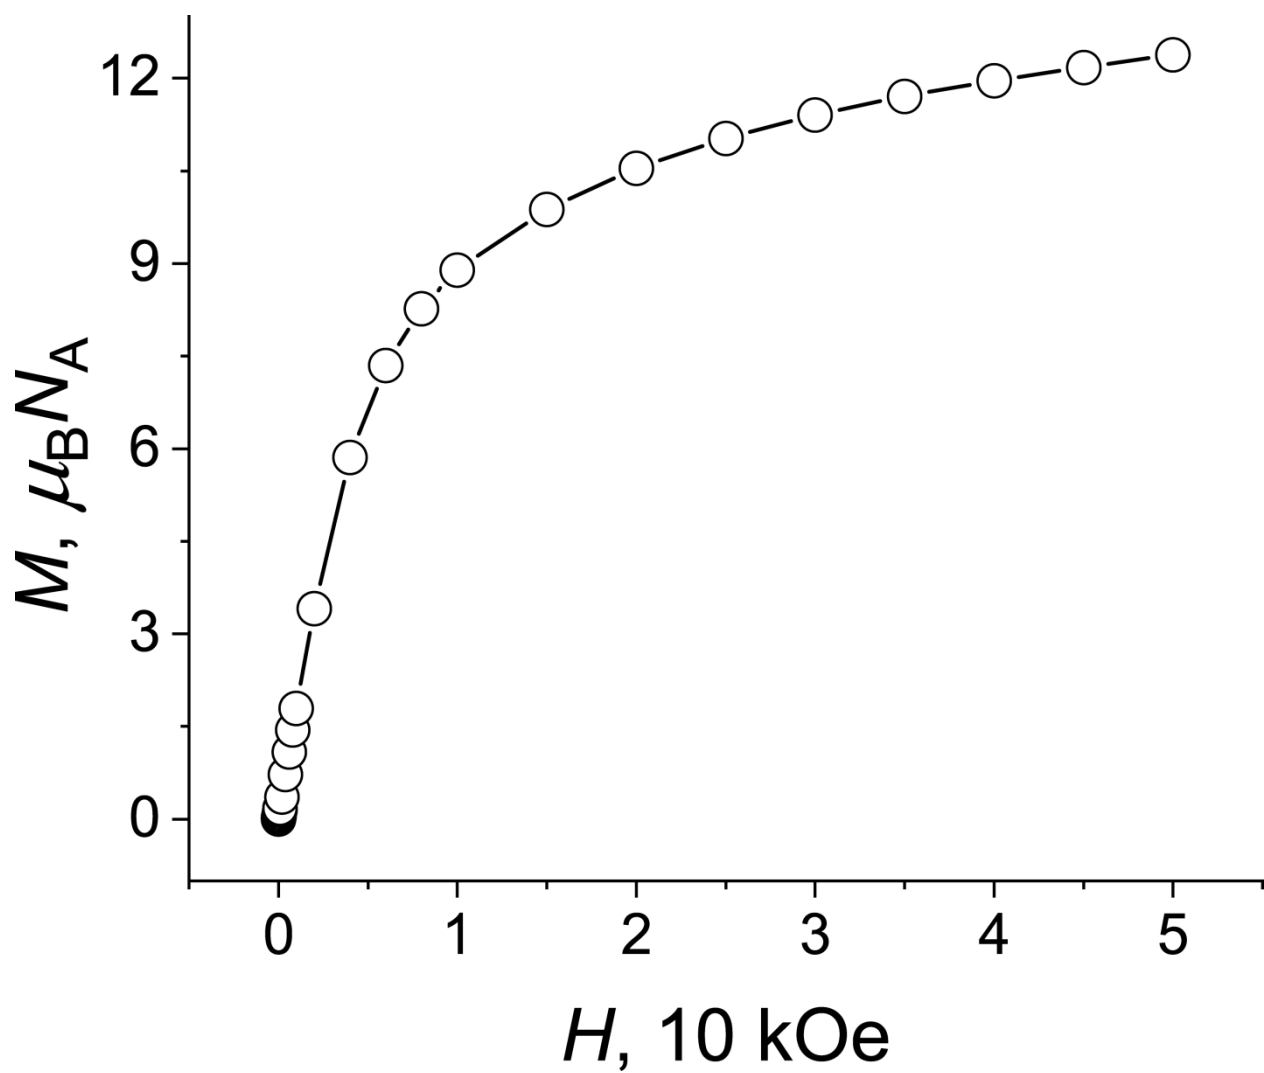

**Figure S13.** Dependence of magnetization of polycrystalline **2** vs magnetic field up to 50 kOe at 2 K (black line is a guide to the eye).

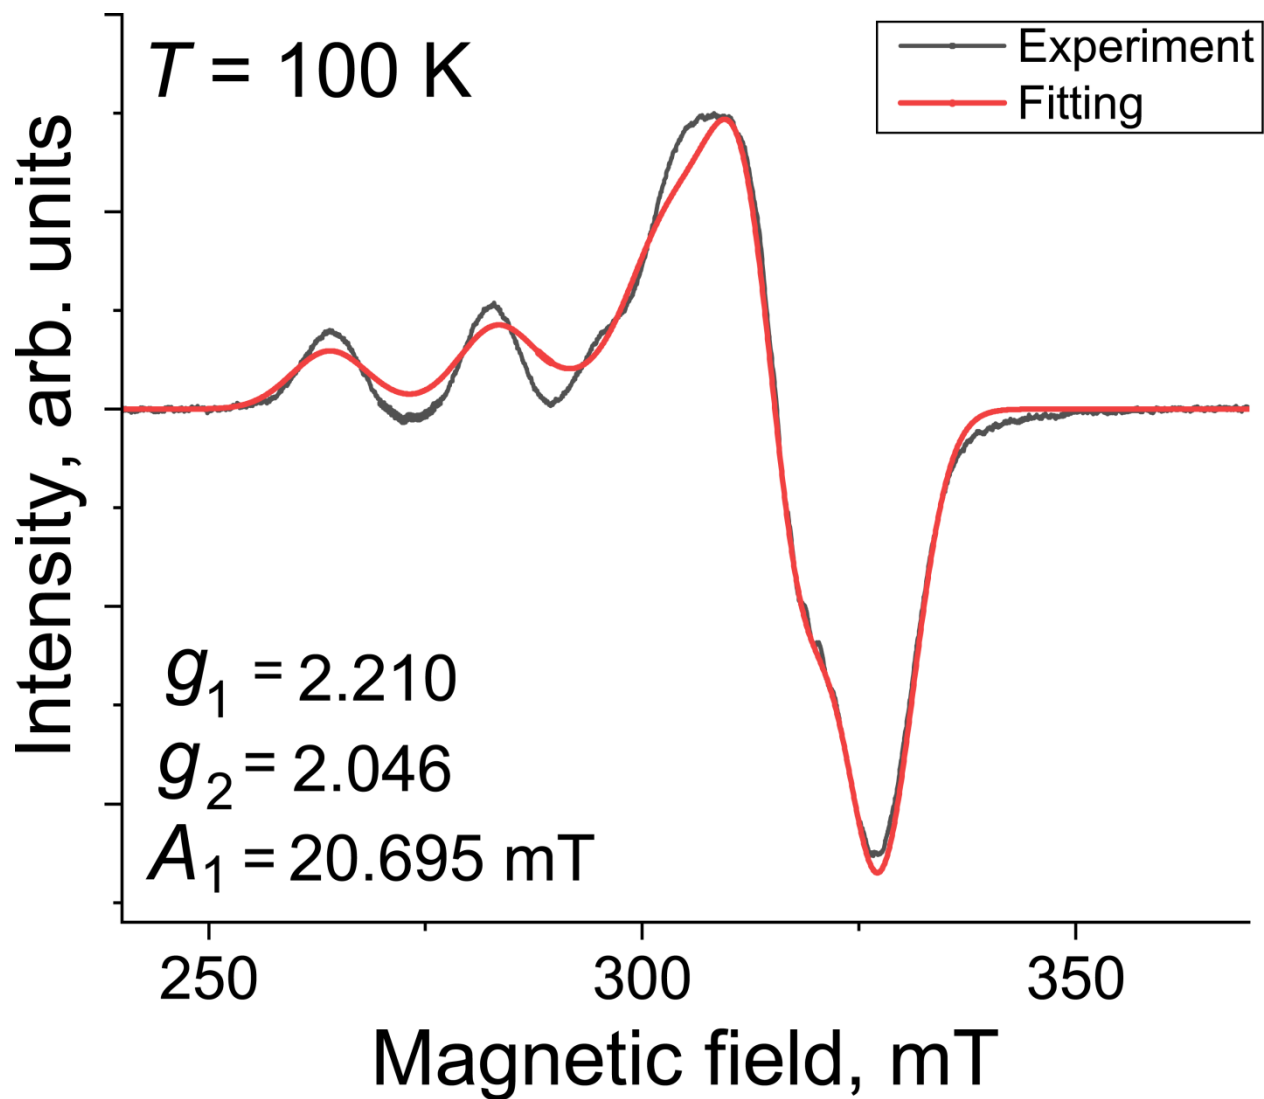

**Fig. S14.** EPR spectrum of polycrystalline **2** at 100 K. Determination of splitting parameter  $A$  as well as parallel and perpendicular  $g$ -factors by Easyspin program<sup>2</sup> is shown.

Compound {Cryptand(Cs<sup>+</sup>)<sub>2</sub>{H<sub>2</sub>TPyP·[Tb<sup>III</sup>(TMHD)<sub>3</sub>]<sub>2</sub>}<sup>2-</sup>·3C<sub>6</sub>H<sub>5</sub>CH<sub>3</sub> (3)

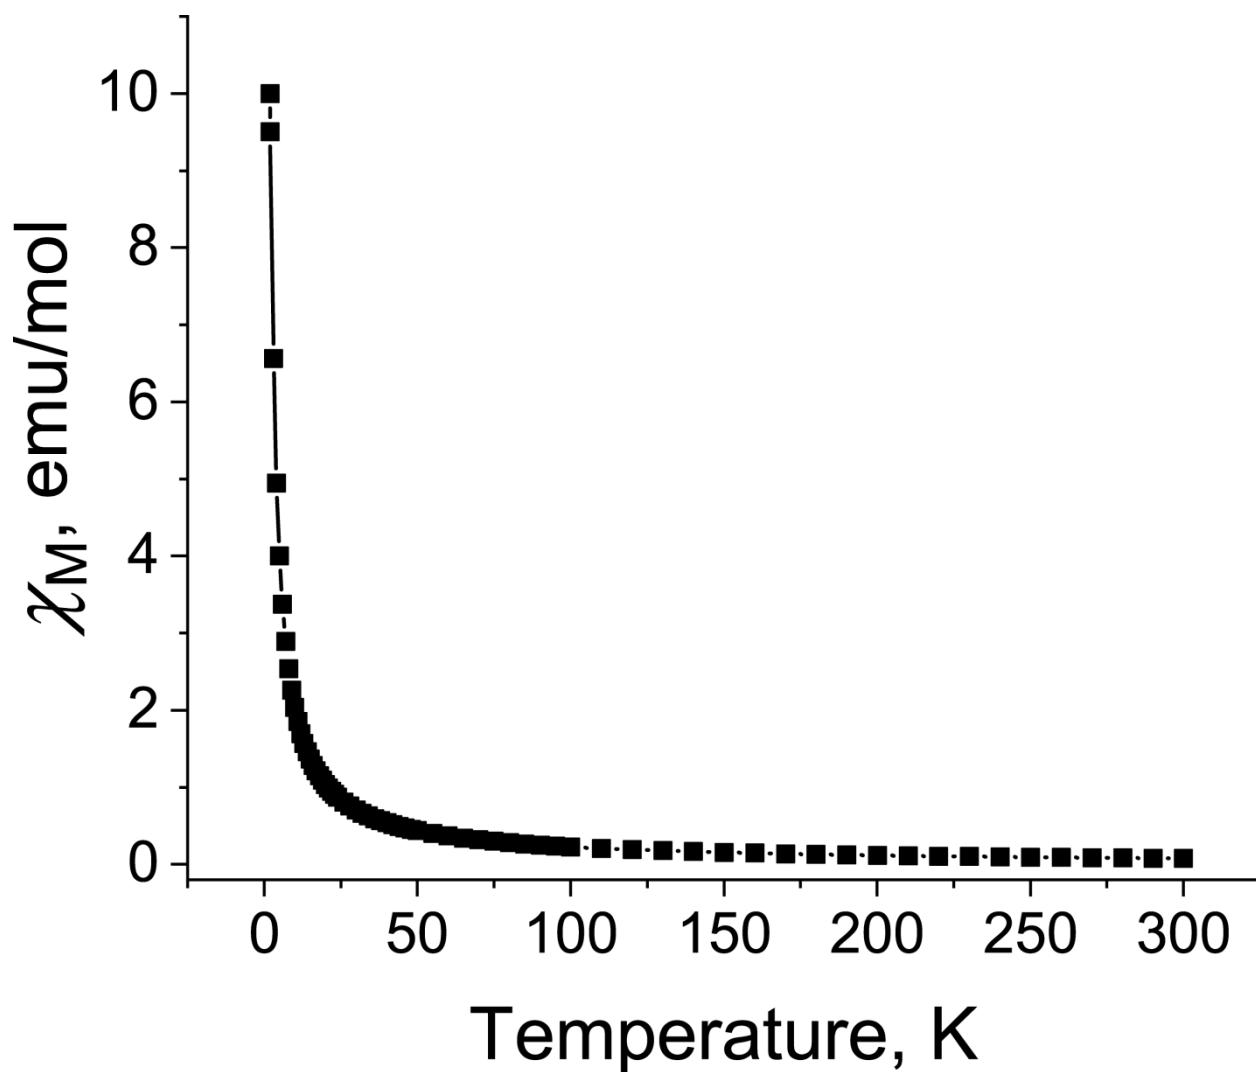

**Figure S15.** Temperature dependence for molar magnetic susceptibility of polycrystalline **3** in the 1.9-300 K range after the subtraction of temperature independent contribution.

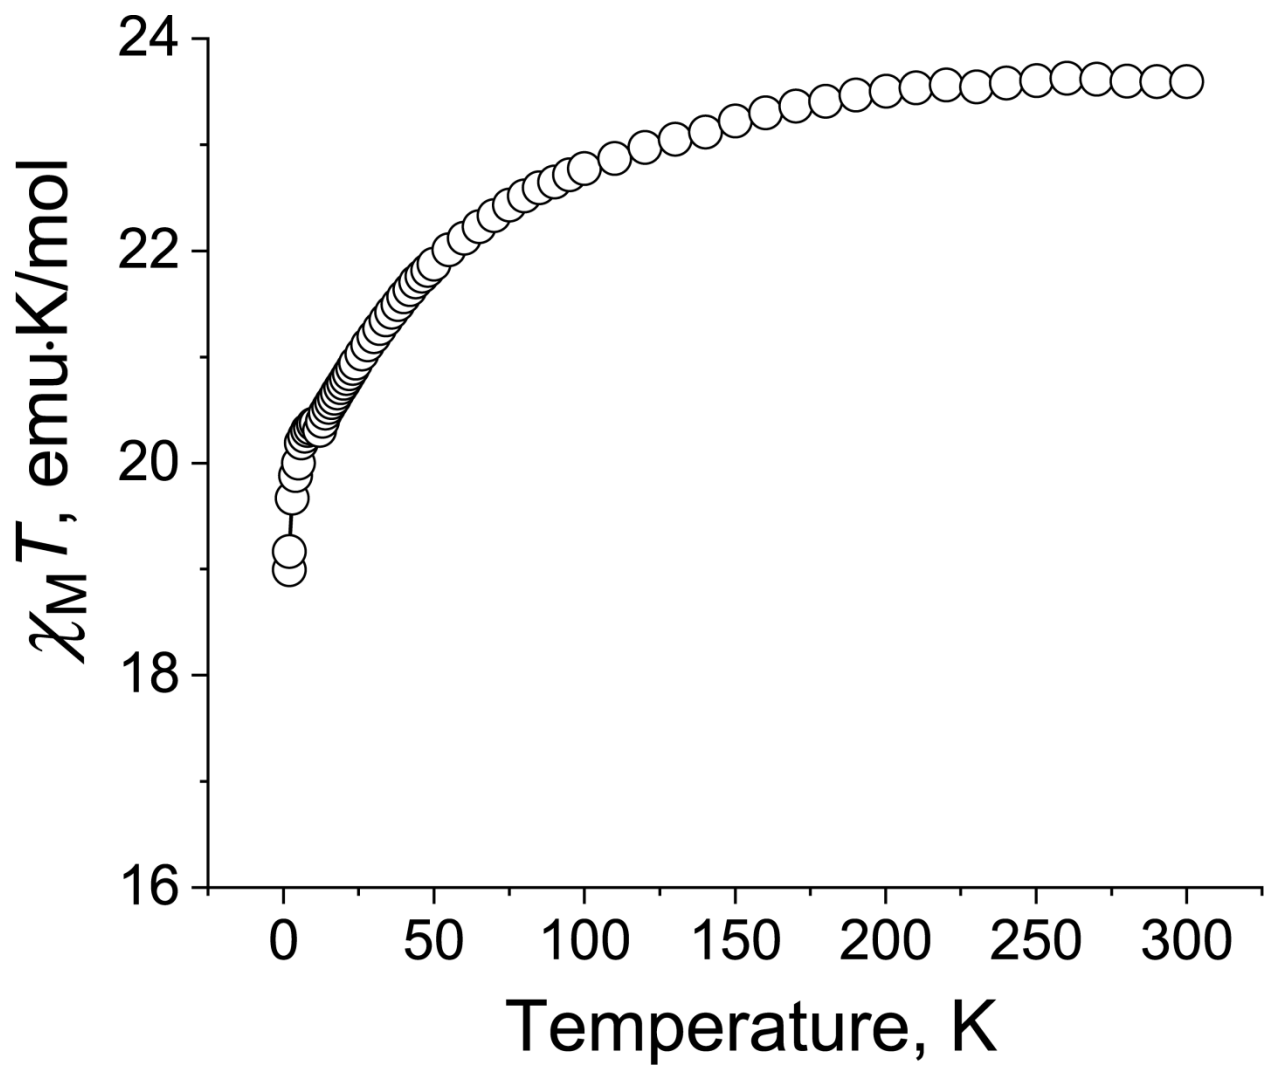

**Fig. S16.** Temperature dependence of the  $\chi_M T$  values for polycrystalline **3** in the 1.9-300 K range.

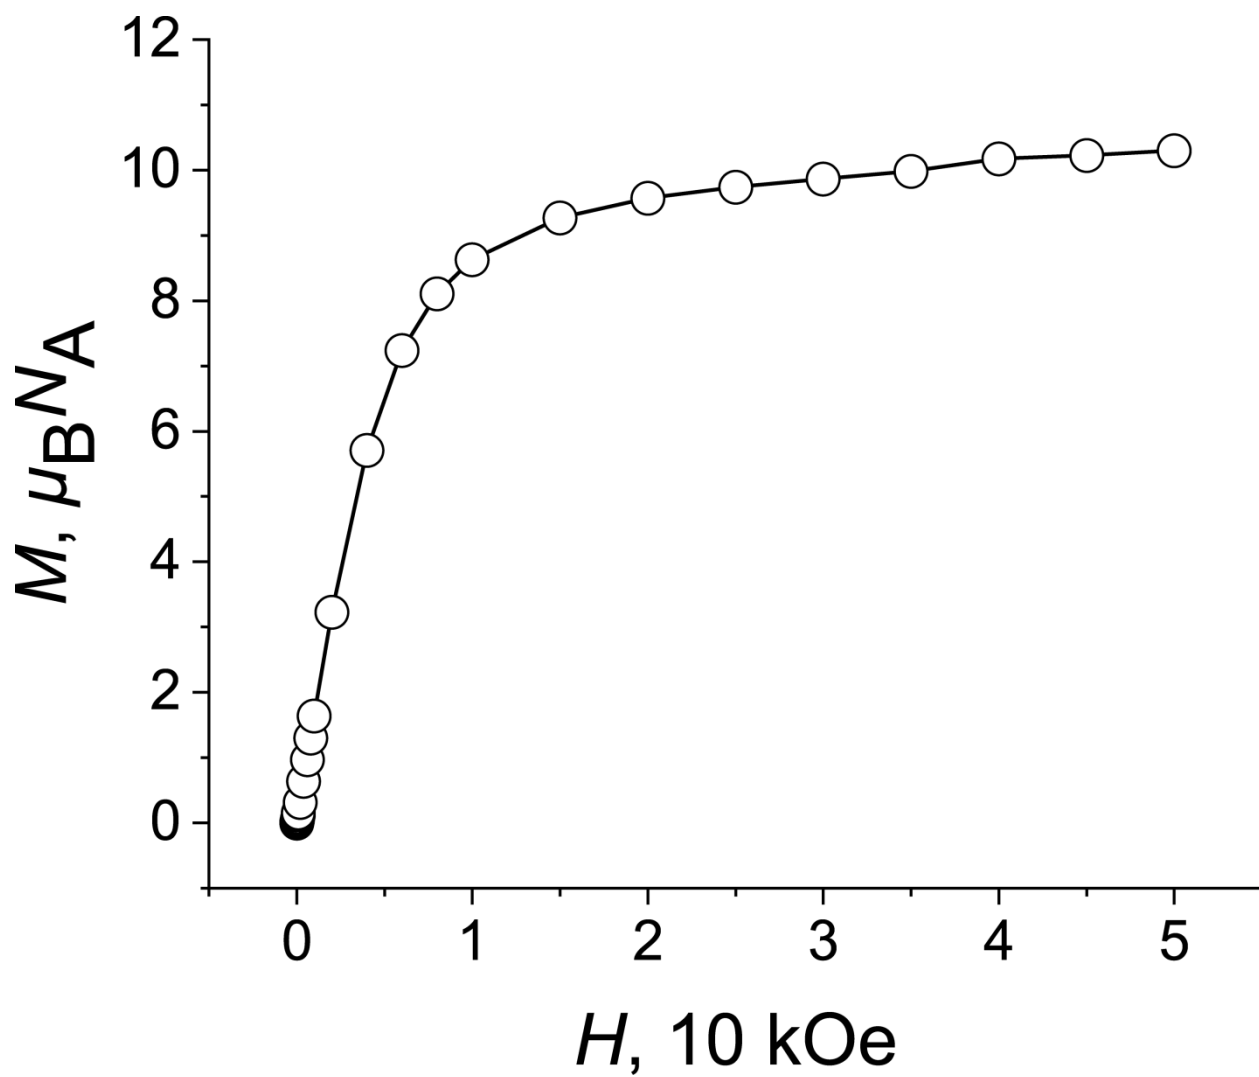

**Figure S17.** Dependence of magnetization of polycrystalline **3** vs magnetic field up to 50 kOe at 2 K (black line is a guide to the eye).

Compound {Cryptand(Cs<sup>+</sup>)<sub>2</sub>{H<sub>2</sub>TPyP·[Gd<sup>III</sup>(TMHD)<sub>3</sub>]<sub>2</sub>}<sup>2-</sup>·3C<sub>6</sub>H<sub>5</sub>CH<sub>3</sub> (4)

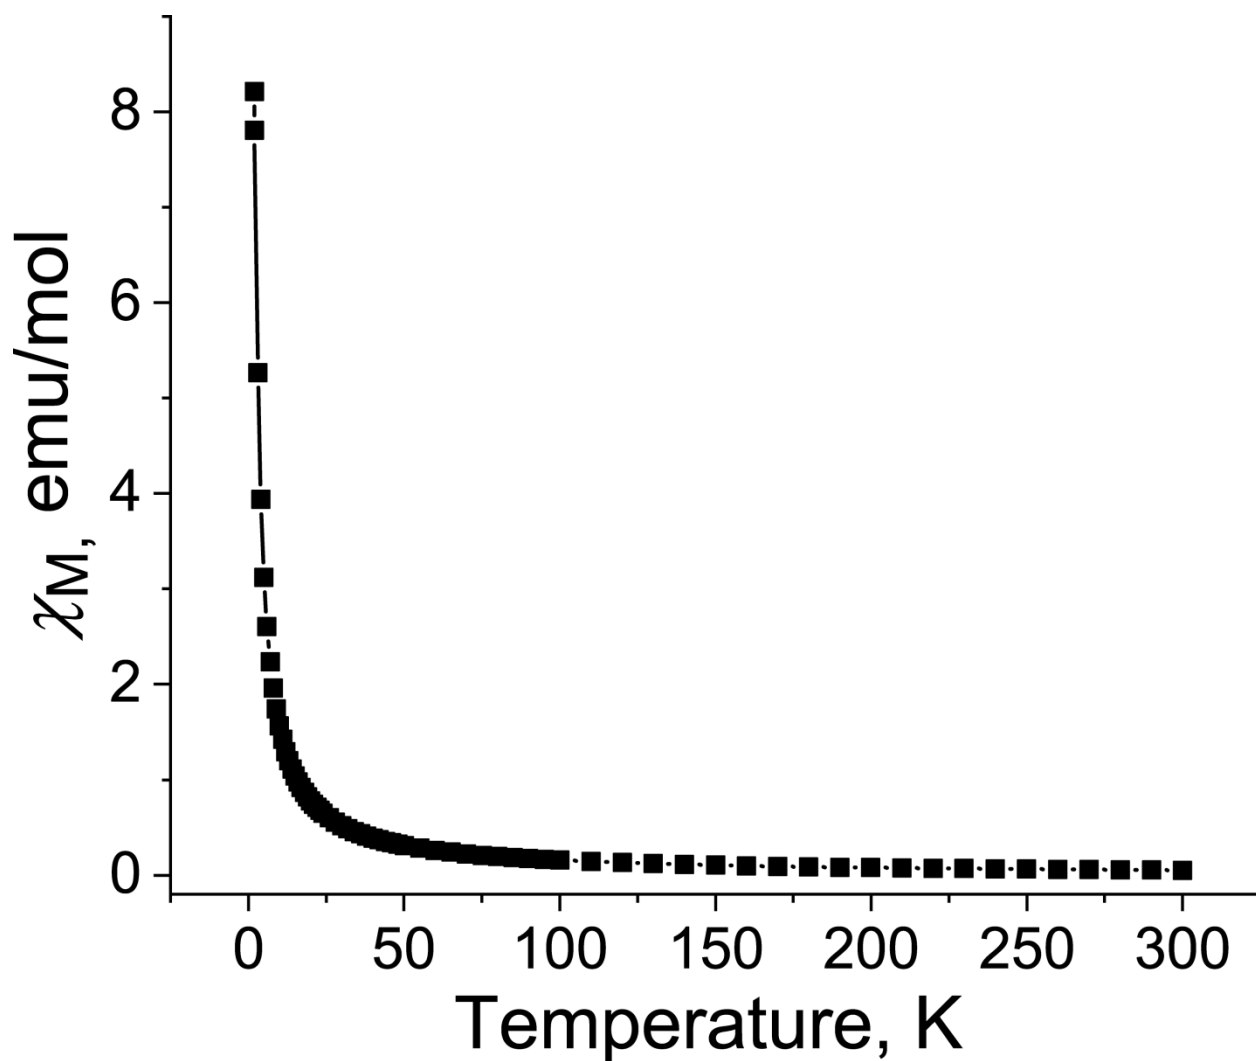

**Figure S18.** Temperature dependence for molar magnetic susceptibility of polycrystalline **4** in the 1.9-300 K range after the subtraction of temperature independent contribution.

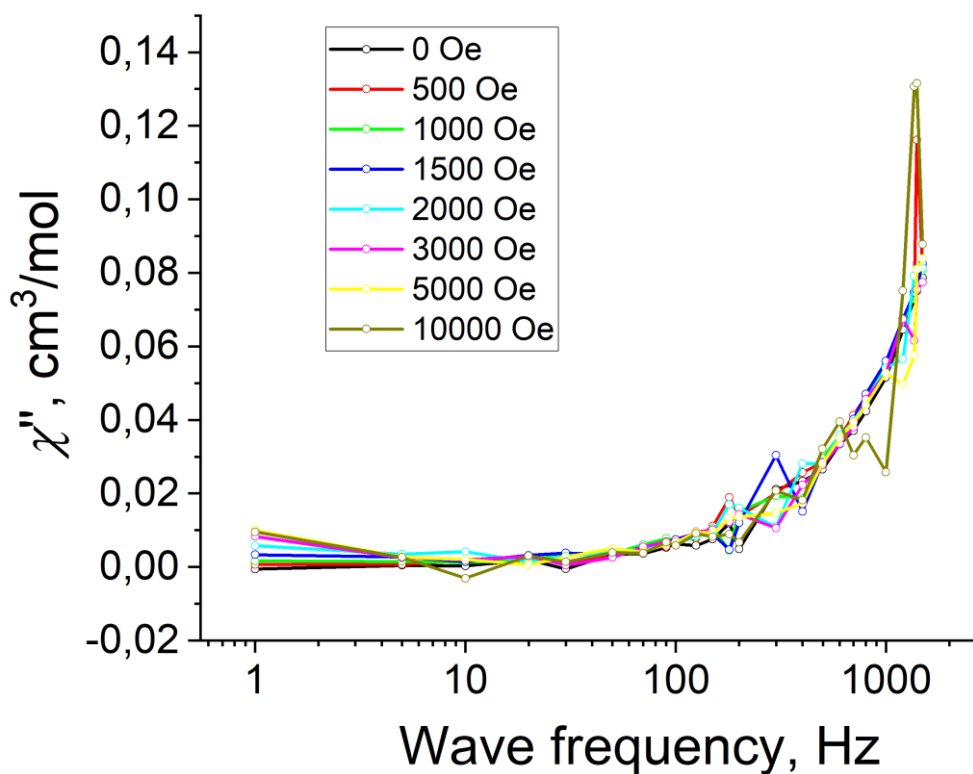

**Figure S19.** Frequency dependences of out-of-phase ( $\chi''$ ) AC susceptibility for **1** at different applied static magnetic fields HDC and T = 2 K.

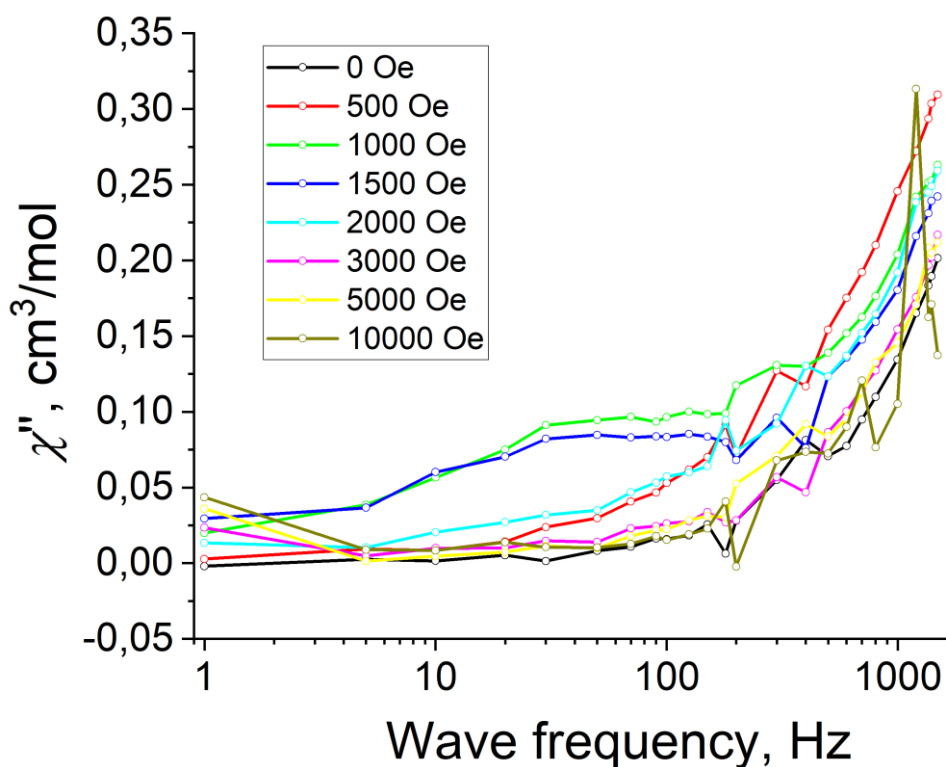

**Figure S20.** Frequency dependences of out-of-phase ( $\chi''$ ) AC susceptibility for **2** at different applied static magnetic fields HDC and T = 2 K.

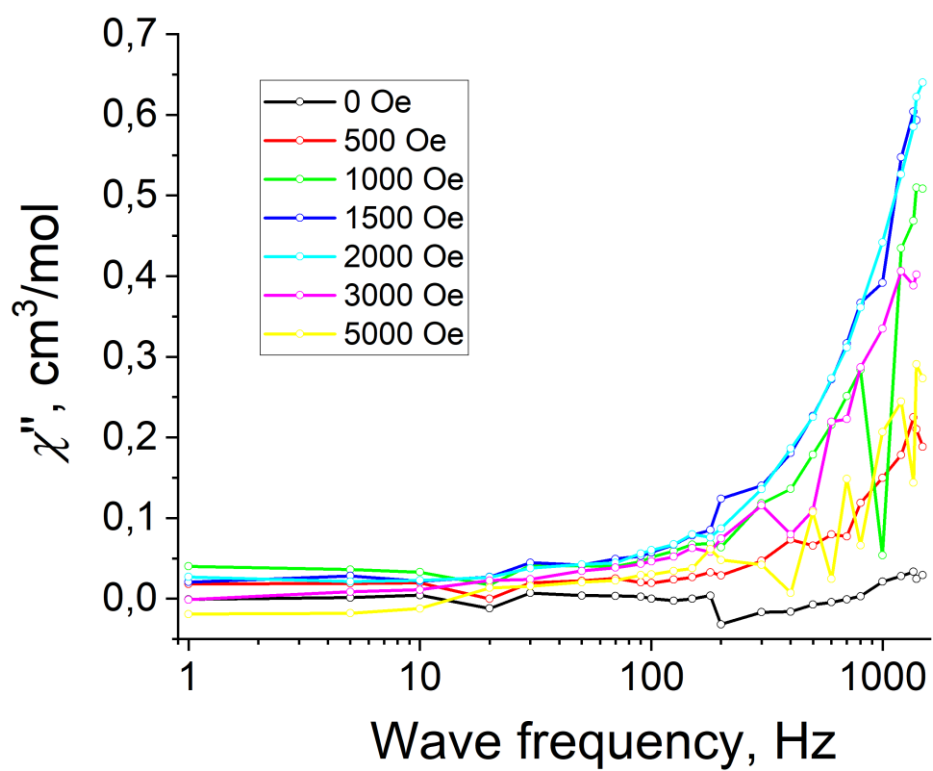

**Figure S21.** Frequency dependences of out-of-phase ( $\chi''$ ) AC susceptibility for **3** at different applied static magnetic fields HDC and T = 2 K.

**Table S5.** Bond lengths and angles for **1**

| <b>Atom–Atom</b> | <b>Length [Å]</b> |
|------------------|-------------------|
| O501–C502        | 1.431(14)         |
| O501–C503        | 1.417(14)         |
| N501–C501        | 1.468(15)         |
| N501–C507        | 1.459(15)         |
| N501–C513        | 1.468(15)         |
| C501–H50A        | 0.9900            |
| C501–H50B        | 0.9900            |
| C501–C502        | 1.504(15)         |
| O502–C504        | 1.428(14)         |
| O502–C505        | 1.430(14)         |
| N502–C506        | 1.464(15)         |
| N502–C512        | 1.466(15)         |
| N502–C518        | 1.473(15)         |
| C502–H50C        | 0.9900            |
| C502–H50D        | 0.9900            |
| O503–C508        | 1.425(14)         |
| O503–C509        | 1.420(14)         |
| C503–H50E        | 0.9900            |
| C503–H50F        | 0.9900            |
| C503–C504        | 1.503(15)         |
| O504–C510        | 1.427(14)         |
| O504–C511        | 1.420(14)         |
| C504–H50G        | 0.9900            |
| C504–H50H        | 0.9900            |
| O505–C514        | 1.428(14)         |
| O505–C515        | 1.419(14)         |
| C505–H50I        | 0.9900            |
| C505–H50J        | 0.9900            |
| C505–C506        | 1.505(15)         |
| O506–C516        | 1.427(14)         |
| O506–C517        | 1.424(14)         |
| C506–H50K        | 0.9900            |
| C506–H50L        | 0.9900            |
| C507–H50M        | 0.9900            |
| C507–H50N        | 0.9900            |
| C507–C508        | 1.503(15)         |
| C508–H50O        | 0.9900            |
| C508–H50P        | 0.9900            |
| C509–H50Q        | 0.9900            |
| C509–H50R        | 0.9900            |
| C509–C510        | 1.495(15)         |
| C510–H51A        | 0.9900            |
| C510–H51B        | 0.9900            |
| C511–H51C        | 0.9900            |
| C511–H51D        | 0.9900            |
| C511–C512        | 1.495(14)         |
| C512–H51E        | 0.9900            |
| C512–H51F        | 0.9900            |
| C513–H51G        | 0.9900            |
| C513–H51H        | 0.9900            |
| C513–C514        | 1.503(15)         |
| C514–H51I        | 0.9900            |
| C514–H51J        | 0.9900            |
| C515–H51K        | 0.9900            |
| C515–H51L        | 0.9900            |
| C515–C516        | 1.501(15)         |

|                         |           |
|-------------------------|-----------|
| C516-H51M               | 0.9900    |
| C516-H51N               | 0.9900    |
| C517-H51O               | 0.9900    |
| C517-H51P               | 0.9900    |
| C517-C518               | 1.504(14) |
| C518-H51Q               | 0.9900    |
| C518-H51R               | 0.9900    |
| Dy11-O105               | 2.33(3)   |
| Dy11-O106               | 2.28(3)   |
| Dy11-O101               | 2.30(3)   |
| Dy11-O102               | 2.24(3)   |
| Dy11-O103               | 2.25(3)   |
| Dy11-O104               | 2.26(4)   |
| Dy11-N306               | 2.77(4)   |
| Dy11-N308 <sup>#1</sup> | 2.60(10)  |
| Dy21-O204               | 2.28(3)   |
| Dy21-O206               | 2.31(3)   |
| Dy21-O201               | 2.301(18) |
| Dy21-O203               | 2.35(3)   |
| Dy21-O205               | 2.29(2)   |
| Dy21-O202               | 2.294(19) |
| Dy21-N307               | 2.58(2)   |
| Dy21-N305 <sup>#2</sup> | 2.61(2)   |
| K51-N304                | 3.02(3)   |
| K51-C315                | 3.54(4)   |
| K51-C318                | 3.40(3)   |
| O105-C127               | 1.27(2)   |
| O204-C218               | 1.268(19) |
| O206-C229               | 1.261(19) |
| O201-C205               | 1.26(2)   |
| C205-C204               | 1.58(3)   |
| C205-C206               | 1.39(5)   |
| C204-C201               | 1.46(3)   |
| C204-C203               | 1.57(3)   |
| C204-C202               | 1.52(3)   |
| C201-H20A               | 0.9800    |
| C201-H20B               | 0.9800    |
| C201-H20C               | 0.9800    |
| C203-H20D               | 0.9800    |
| C203-H20E               | 0.9800    |
| C203-H20F               | 0.9800    |
| C202-H20G               | 0.9800    |
| C202-H20H               | 0.9800    |
| C202-H20I               | 0.9800    |
| O106-C129               | 1.266(19) |
| O101-C105               | 1.28(2)   |
| O203-C216               | 1.261(19) |
| O102-C107               | 1.27(2)   |
| O205-C227               | 1.260(19) |
| O103-C116               | 1.27(2)   |
| O104-C118               | 1.26(2)   |
| O202-C207               | 1.26(2)   |
| C207-C208               | 1.58(3)   |
| C207-C206               | 1.42(5)   |
| C208-C209               | 1.46(3)   |
| C208-C210               | 1.57(3)   |
| C208-C211               | 1.52(3)   |
| C209-H20J               | 0.9800    |
| C209-H20K               | 0.9800    |

|           |           |
|-----------|-----------|
| C209-H20L | 0.9800    |
| C210-H21A | 0.9800    |
| C210-H21B | 0.9800    |
| C210-H21C | 0.9800    |
| C211-H21D | 0.9800    |
| C211-H21E | 0.9800    |
| C211-H21F | 0.9800    |
| N302-H302 | 0.8800    |
| N302-C305 | 1.4200    |
| N302-C308 | 1.4200    |
| C305-C306 | 1.4200    |
| C305-C304 | 1.365(18) |
| C306-H306 | 0.9500    |
| C306-C307 | 1.4200    |
| C307-H307 | 0.9500    |
| C307-C308 | 1.4200    |
| C308-C309 | 1.363(18) |
| N307-C334 | 1.3900    |
| N307-C333 | 1.3900    |
| C334-H334 | 0.9500    |
| C334-C335 | 1.3900    |
| C335-H335 | 0.9500    |
| C335-C331 | 1.3900    |
| C331-C332 | 1.3900    |
| C331-C314 | 1.49(4)   |
| C332-H332 | 0.9500    |
| C332-C333 | 1.3900    |
| C333-H333 | 0.9500    |
| N301-H301 | 0.8800    |
| N301-C320 | 1.4200    |
| N301-C303 | 1.4200    |
| C320-C301 | 1.4200    |
| C320-C319 | 1.371(18) |
| C301-H30A | 0.9500    |
| C301-C302 | 1.4200    |
| C302-H30B | 0.9500    |
| C302-C303 | 1.4200    |
| C303-C304 | 1.365(18) |
| N304-H304 | 0.8800    |
| N304-C315 | 1.4200    |
| N304-C318 | 1.4200    |
| C315-C316 | 1.4200    |
| C315-C314 | 1.357(18) |
| C316-H316 | 0.9500    |
| C316-C317 | 1.4200    |
| C317-H317 | 0.9500    |
| C317-C318 | 1.4200    |
| C318-C319 | 1.368(17) |
| N305-C324 | 1.3900    |
| N305-C323 | 1.3900    |
| C324-H324 | 0.9500    |
| C324-C325 | 1.3900    |
| C325-H325 | 0.9500    |
| C325-C321 | 1.3900    |
| C321-C322 | 1.3900    |
| C321-C304 | 1.49(4)   |
| C322-H322 | 0.9500    |
| C322-C323 | 1.3900    |
| C323-H323 | 0.9500    |

|           |           |
|-----------|-----------|
| N306-C328 | 1.33(5)   |
| N306-C329 | 1.32(5)   |
| C109-H10A | 0.9800    |
| C109-H10B | 0.9800    |
| C109-H10C | 0.9800    |
| C109-C108 | 1.48(2)   |
| C108-C110 | 1.48(2)   |
| C108-C111 | 1.51(2)   |
| C108-C107 | 1.556(15) |
| C110-H11A | 0.9800    |
| C110-H11B | 0.9800    |
| C110-H11C | 0.9800    |
| C111-H11D | 0.9800    |
| C111-H11E | 0.9800    |
| C111-H11F | 0.9800    |
| C226-C224 | 1.50(2)   |
| C226-C223 | 1.49(2)   |
| C226-C225 | 1.48(2)   |
| C226-C227 | 1.554(14) |
| C112-H11G | 0.9800    |
| C112-H11H | 0.9800    |
| C112-H11I | 0.9800    |
| C112-C115 | 1.425(15) |
| C113-H11J | 0.9800    |
| C113-H11K | 0.9800    |
| C113-H11L | 0.9800    |
| C113-C115 | 1.423(16) |
| C336-C337 | 1.3900    |
| C336-C340 | 1.3900    |
| C336-C319 | 1.54(4)   |
| C337-H337 | 0.9500    |
| C337-C338 | 1.3900    |
| C338-H338 | 0.9500    |
| C338-N308 | 1.3900    |
| N308-C339 | 1.3900    |
| C339-H339 | 0.9500    |
| C339-C340 | 1.3900    |
| C340-H340 | 0.9500    |
| C114-H11M | 0.9800    |
| C114-H11N | 0.9800    |
| C114-H11O | 0.9800    |
| C114-C115 | 1.446(16) |
| C222-H22A | 0.9800    |
| C222-H22B | 0.9800    |
| C222-H22C | 0.9800    |
| C222-C219 | 1.50(2)   |
| C115-C116 | 1.559(15) |
| C230-C232 | 1.431(15) |
| C230-C229 | 1.555(14) |
| C230-C231 | 1.441(15) |
| C230-C233 | 1.454(15) |
| C116-C117 | 1.390(6)  |
| C117-H117 | 0.9500    |
| C117-C118 | 1.390(6)  |
| C118-C119 | 1.546(15) |
| C119-C120 | 1.51(2)   |
| C119-C121 | 1.47(2)   |
| C119-C122 | 1.48(2)   |
| C120-H12A | 0.9800    |

|           |           |
|-----------|-----------|
| C120-H12B | 0.9800    |
| C120-H12C | 0.9800    |
| C220-H22D | 0.9800    |
| C220-H22E | 0.9800    |
| C220-H22F | 0.9800    |
| C220-C219 | 1.51(2)   |
| C121-H12D | 0.9800    |
| C121-H12E | 0.9800    |
| C121-H12F | 0.9800    |
| C224-H22G | 0.9800    |
| C224-H22H | 0.9800    |
| C224-H22I | 0.9800    |
| C122-H12G | 0.9800    |
| C122-H12H | 0.9800    |
| C122-H12I | 0.9800    |
| C228-H228 | 0.9500    |
| C228-C227 | 1.391(6)  |
| C228-C229 | 1.391(6)  |
| C123-H12J | 0.9800    |
| C123-H12K | 0.9800    |
| C123-H12L | 0.9800    |
| C123-C126 | 1.50(2)   |
| C232-H23A | 0.9800    |
| C232-H23B | 0.9800    |
| C232-H23C | 0.9800    |
| C124-H12M | 0.9800    |
| C124-H12N | 0.9800    |
| C124-H12O | 0.9800    |
| C124-C126 | 1.52(2)   |
| C104-C105 | 1.556(15) |
| C104-C101 | 1.432(15) |
| C104-C102 | 1.437(15) |
| C104-C103 | 1.448(16) |
| C125-H12P | 0.9800    |
| C125-H12Q | 0.9800    |
| C125-H12R | 0.9800    |
| C125-C126 | 1.48(2)   |
| C105-C106 | 1.390(6)  |
| C126-C127 | 1.552(15) |
| C127-C128 | 1.390(6)  |
| C128-H128 | 0.9500    |
| C128-C129 | 1.390(6)  |
| C129-C130 | 1.556(15) |
| C130-C131 | 1.436(15) |
| C130-C132 | 1.446(15) |
| C130-C133 | 1.453(16) |
| C131-H13A | 0.9800    |
| C131-H13B | 0.9800    |
| C131-H13C | 0.9800    |
| C314-C313 | 1.360(18) |
| C132-H13D | 0.9800    |
| C132-H13E | 0.9800    |
| C132-H13F | 0.9800    |
| C219-C221 | 1.47(2)   |
| C219-C218 | 1.552(15) |
| C133-H13G | 0.9800    |
| C133-H13H | 0.9800    |
| C133-H13I | 0.9800    |
| C221-H22J | 0.9800    |

|           |           |
|-----------|-----------|
| C221-H22K | 0.9800    |
| C221-H22L | 0.9800    |
| C223-H22M | 0.9800    |
| C223-H22N | 0.9800    |
| C223-H22O | 0.9800    |
| C225-H22P | 0.9800    |
| C225-H22Q | 0.9800    |
| C225-H22R | 0.9800    |
| C101-H10D | 0.9800    |
| C101-H10E | 0.9800    |
| C101-H10F | 0.9800    |
| C328-H328 | 0.9500    |
| C328-C327 | 1.45(6)   |
| C231-H23D | 0.9800    |
| C231-H23E | 0.9800    |
| C231-H23F | 0.9800    |
| C233-H23G | 0.9800    |
| C233-H23H | 0.9800    |
| C233-H23I | 0.9800    |
| C102-H10G | 0.9800    |
| C102-H10H | 0.9800    |
| C102-H10I | 0.9800    |
| C103-H10J | 0.9800    |
| C103-H10K | 0.9800    |
| C103-H10L | 0.9800    |
| C330-H330 | 0.9500    |
| C330-C326 | 1.44(6)   |
| C330-C329 | 1.34(6)   |
| C213-H21G | 0.9800    |
| C213-H21H | 0.9800    |
| C213-H21I | 0.9800    |
| C213-C215 | 1.434(15) |
| C214-H21J | 0.9800    |
| C214-H21K | 0.9800    |
| C214-H21L | 0.9800    |
| C214-C215 | 1.422(16) |
| C215-C216 | 1.552(14) |
| C215-C212 | 1.442(16) |
| C106-H106 | 0.9500    |
| C106-C107 | 1.390(6)  |
| C216-C217 | 1.390(6)  |
| C217-H217 | 0.9500    |
| C217-C218 | 1.392(6)  |
| C206-H206 | 0.9500    |
| C311-H311 | 0.9500    |
| C311-C310 | 1.4200    |
| C311-C312 | 1.4200    |
| C310-N303 | 1.4200    |
| C310-C309 | 1.363(18) |
| N303-H303 | 0.8800    |
| N303-C313 | 1.4200    |
| C313-C312 | 1.4200    |
| C312-H312 | 0.9500    |
| C309-C326 | 1.60(6)   |
| C326-C327 | 1.48(5)   |
| C329-H329 | 0.9500    |
| C212-H21M | 0.9800    |
| C212-H21N | 0.9800    |
| C212-H21O | 0.9800    |

C327–H327 0.9500

| <b>Atom–Atom–Atom</b> | <b>Angle [°]</b> |
|-----------------------|------------------|
| C503–O501–C502        | 120(3)           |
| C507–N501–C501        | 97(4)            |
| C507–N501–C513        | 117(5)           |
| C513–N501–C501        | 115(5)           |
| N501–C501–H50A        | 109.2            |
| N501–C501–H50B        | 109.2            |
| N501–C501–C502        | 112(2)           |
| H50A–C501–H50B        | 107.9            |
| C502–C501–H50A        | 109.2            |
| C502–C501–H50B        | 109.2            |
| C504–O502–C505        | 119(3)           |
| C506–N502–C512        | 112(4)           |
| C506–N502–C518        | 105(4)           |
| C512–N502–C518        | 111(4)           |
| O501–C502–C501        | 106(2)           |
| O501–C502–H50C        | 110.5            |
| O501–C502–H50D        | 110.5            |
| C501–C502–H50C        | 110.5            |
| C501–C502–H50D        | 110.5            |
| H50C–C502–H50D        | 108.7            |
| C509–O503–C508        | 119(3)           |
| O501–C503–H50E        | 110.2            |
| O501–C503–H50F        | 110.2            |
| O501–C503–C504        | 107(2)           |
| H50E–C503–H50F        | 108.5            |
| C504–C503–H50E        | 110.2            |
| C504–C503–H50F        | 110.2            |
| C511–O504–C510        | 124(3)           |
| O502–C504–C503        | 107(2)           |
| O502–C504–H50G        | 110.4            |
| O502–C504–H50H        | 110.4            |
| C503–C504–H50G        | 110.4            |
| C503–C504–H50H        | 110.4            |
| H50G–C504–H50H        | 108.6            |
| C515–O505–C514        | 119(3)           |
| O502–C505–H50I        | 110.2            |
| O502–C505–H50J        | 110.2            |
| O502–C505–C506        | 107(2)           |
| H50I–C505–H50J        | 108.5            |
| C506–C505–H50I        | 110.2            |
| C506–C505–H50J        | 110.2            |
| C517–O506–C516        | 122(3)           |
| N502–C506–C505        | 114(2)           |
| N502–C506–H50K        | 108.8            |
| N502–C506–H50L        | 108.8            |
| C505–C506–H50K        | 108.8            |
| C505–C506–H50L        | 108.8            |
| H50K–C506–H50L        | 107.7            |
| N501–C507–H50M        | 108.9            |
| N501–C507–H50N        | 108.9            |
| N501–C507–C508        | 113(2)           |
| H50M–C507–H50N        | 107.7            |
| C508–C507–H50M        | 108.9            |
| C508–C507–H50N        | 108.9            |
| O503–C508–C507        | 107(2)           |
| O503–C508–H50O        | 110.3            |

|                |           |
|----------------|-----------|
| O503-C508-H50P | 110.3     |
| C507-C508-H50O | 110.3     |
| C507-C508-H50P | 110.3     |
| H500-C508-H50P | 108.6     |
| O503-C509-H50Q | 110.1     |
| O503-C509-H50R | 110.1     |
| O503-C509-C510 | 108(2)    |
| H50Q-C509-H50R | 108.4     |
| C510-C509-H50Q | 110.1     |
| C510-C509-H50R | 110.1     |
| O504-C510-C509 | 106(2)    |
| O504-C510-H51A | 110.6     |
| O504-C510-H51B | 110.6     |
| C509-C510-H51A | 110.6     |
| C509-C510-H51B | 110.6     |
| H51A-C510-H51B | 108.7     |
| O504-C511-H51C | 110.0     |
| O504-C511-H51D | 110.0     |
| O504-C511-C512 | 109(2)    |
| H51C-C511-H51D | 108.4     |
| C512-C511-H51C | 110.0     |
| C512-C511-H51D | 110.0     |
| N502-C512-C511 | 115(2)    |
| N502-C512-H51E | 108.6     |
| N502-C512-H51F | 108.6     |
| C511-C512-H51E | 108.6     |
| C511-C512-H51F | 108.6     |
| H51E-C512-H51F | 107.6     |
| N501-C513-H51G | 109.0     |
| N501-C513-H51H | 109.0     |
| N501-C513-C514 | 113(2)    |
| H51G-C513-H51H | 107.8     |
| C514-C513-H51G | 109.0     |
| C514-C513-H51H | 109.0     |
| O505-C514-C513 | 107(2)    |
| O505-C514-H51I | 110.4     |
| O505-C514-H51J | 110.4     |
| C513-C514-H51I | 110.4     |
| C513-C514-H51J | 110.4     |
| H51I-C514-H51J | 108.6     |
| O505-C515-H51K | 110.1     |
| O505-C515-H51L | 110.1     |
| O505-C515-C516 | 108(2)    |
| H51K-C515-H51L | 108.4     |
| C516-C515-H51K | 110.1     |
| C516-C515-H51L | 110.1     |
| O506-C516-C515 | 104.7(19) |
| O506-C516-H51M | 110.8     |
| O506-C516-H51N | 110.8     |
| C515-C516-H51M | 110.8     |
| C515-C516-H51N | 110.8     |
| H51M-C516-H51N | 108.9     |
| O506-C517-H51O | 110.5     |
| O506-C517-H51P | 110.5     |
| O506-C517-C518 | 106(2)    |
| H51O-C517-H51P | 108.6     |
| C518-C517-H51O | 110.5     |
| C518-C517-H51P | 110.5     |
| N502-C518-C517 | 113(2)    |

|                               |           |
|-------------------------------|-----------|
| N502-C518-H51Q                | 109.0     |
| N502-C518-H51R                | 109.0     |
| C517-C518-H51Q                | 109.0     |
| C517-C518-H51R                | 109.0     |
| H51Q-C518-H51R                | 107.8     |
| O105-Dy11-N306                | 75.8(10)  |
| O105-Dy11-N308 <sup>#1</sup>  | 74(6)     |
| O106-Dy11-O105                | 73.6(11)  |
| O106-Dy11-O101                | 113.9(9)  |
| O106-Dy11-N306                | 72.1(11)  |
| O106-Dy11-N308 <sup>#1</sup>  | 137(6)    |
| O101-Dy11-O105                | 142.2(11) |
| O101-Dy11-N306                | 72.3(11)  |
| O101-Dy11-N308 <sup>#1</sup>  | 78(6)     |
| O102-Dy11-O105                | 141.1(11) |
| O102-Dy11-O106                | 75.0(10)  |
| O102-Dy11-O101                | 72.7(12)  |
| O102-Dy11-O103                | 79.9(10)  |
| O102-Dy11-O104                | 78.5(11)  |
| O102-Dy11-N306                | 115.2(9)  |
| O102-Dy11-N308 <sup>#1</sup>  | 145(6)    |
| O103-Dy11-O105                | 116.3(10) |
| O103-Dy11-O106                | 146.0(11) |
| O103-Dy11-O101                | 79.1(10)  |
| O103-Dy11-O104                | 70.8(12)  |
| O103-Dy11-N306                | 140.7(13) |
| O103-Dy11-N308 <sup>#1</sup>  | 75(5)     |
| O104-Dy11-O105                | 74.8(10)  |
| O104-Dy11-O106                | 81.9(10)  |
| O104-Dy11-O101                | 141.4(11) |
| O104-Dy11-N306                | 145.1(12) |
| O104-Dy11-N308 <sup>#1</sup>  | 115(5)    |
| N308 <sup>#1</sup> -Dy11-N306 | 73(5)     |
| O204-Dy21-O206                | 86.0(8)   |
| O204-Dy21-O201                | 145.1(8)  |
| O204-Dy21-O203                | 71.0(9)   |
| O204-Dy21-O205                | 82.2(8)   |
| O204-Dy21-O202                | 108.6(8)  |
| O204-Dy21-N307                | 142.2(9)  |
| O204-Dy21-N305 <sup>#2</sup>  | 73.1(9)   |
| O206-Dy21-O203                | 79.8(8)   |
| O206-Dy21-N307                | 74.6(9)   |
| O206-Dy21-N305 <sup>#2</sup>  | 142.3(9)  |
| O201-Dy21-O206                | 109.4(7)  |
| O201-Dy21-O203                | 141.0(8)  |
| O201-Dy21-N307                | 72.7(8)   |
| O201-Dy21-N305 <sup>#2</sup>  | 76.3(9)   |
| O203-Dy21-N307                | 73.8(9)   |
| O203-Dy21-N305 <sup>#2</sup>  | 120.0(9)  |
| O205-Dy21-O206                | 71.7(9)   |
| O205-Dy21-O201                | 73.9(8)   |
| O205-Dy21-O203                | 142.0(9)  |
| O205-Dy21-O202                | 138.6(9)  |
| O205-Dy21-N307                | 120.1(9)  |
| O205-Dy21-N305 <sup>#2</sup>  | 74.6(9)   |
| O202-Dy21-O206                | 146.4(9)  |
| O202-Dy21-O201                | 76.0(8)   |
| O202-Dy21-O203                | 77.0(8)   |
| O202-Dy21-N307                | 75.8(9)   |

|                              |           |
|------------------------------|-----------|
| O202-Dy21-N305 <sup>#2</sup> | 71.1(9)   |
| N307-Dy21-N305 <sup>#2</sup> | 139.0(9)  |
| N304-K51-C315                | 23.4(3)   |
| N304-K51-C318                | 24.6(3)   |
| C318-K51-C315                | 38.6(3)   |
| C127-O105-Dy11               | 132(2)    |
| C218-O204-Dy21               | 135.9(18) |
| C229-O206-Dy21               | 137.5(19) |
| C205-O201-Dy21               | 133.0(15) |
| O201-C205-C204               | 114.3(17) |
| O201-C205-C206               | 128(3)    |
| C206-C205-C204               | 118(3)    |
| C201-C204-C205               | 109.6(19) |
| C201-C204-C203               | 115(2)    |
| C201-C204-C202               | 109(2)    |
| C203-C204-C205               | 112.9(18) |
| C202-C204-C205               | 107.4(17) |
| C202-C204-C203               | 103.1(18) |
| C204-C201-H20A               | 109.5     |
| C204-C201-H20B               | 109.5     |
| C204-C201-H20C               | 109.5     |
| H20A-C201-H20B               | 109.5     |
| H20A-C201-H20C               | 109.5     |
| H20B-C201-H20C               | 109.5     |
| C204-C203-H20D               | 109.5     |
| C204-C203-H20E               | 109.5     |
| C204-C203-H20F               | 109.5     |
| H20D-C203-H20E               | 109.5     |
| H20D-C203-H20F               | 109.5     |
| H20E-C203-H20F               | 109.5     |
| C204-C202-H20G               | 109.5     |
| C204-C202-H20H               | 109.5     |
| C204-C202-H20I               | 109.5     |
| H20G-C202-H20H               | 109.5     |
| H20G-C202-H20I               | 109.5     |
| H20H-C202-H20I               | 109.5     |
| C129-O106-Dy11               | 133(2)    |
| C105-O101-Dy11               | 135(2)    |
| C216-O203-Dy21               | 132.5(19) |
| C107-O102-Dy11               | 137(2)    |
| C227-O205-Dy21               | 139.4(19) |
| C116-O103-Dy11               | 139(3)    |
| C118-O104-Dy11               | 143(3)    |
| C207-O202-Dy21               | 133.1(16) |
| O202-C207-C208               | 114.3(17) |
| O202-C207-C206               | 127(3)    |
| C206-C207-C208               | 118(3)    |
| C209-C208-C207               | 109.6(19) |
| C209-C208-C210               | 115(2)    |
| C209-C208-C211               | 109(2)    |
| C210-C208-C207               | 112.9(18) |
| C211-C208-C207               | 107.4(17) |
| C211-C208-C210               | 103.1(18) |
| C208-C209-H20J               | 109.5     |
| C208-C209-H20K               | 109.5     |
| C208-C209-H20L               | 109.5     |
| H20J-C209-H20K               | 109.5     |
| H20J-C209-H20L               | 109.5     |
| H20K-C209-H20L               | 109.5     |

|                |           |
|----------------|-----------|
| C208-C210-H21A | 109.5     |
| C208-C210-H21B | 109.5     |
| C208-C210-H21C | 109.5     |
| H21A-C210-H21B | 109.5     |
| H21A-C210-H21C | 109.5     |
| H21B-C210-H21C | 109.5     |
| C208-C211-H21D | 109.5     |
| C208-C211-H21E | 109.5     |
| C208-C211-H21F | 109.5     |
| H21D-C211-H21E | 109.5     |
| H21D-C211-H21F | 109.5     |
| H21E-C211-H21F | 109.5     |
| C305-N302-H302 | 126.0     |
| C305-N302-C308 | 108.0     |
| C308-N302-H302 | 126.0     |
| C306-C305-N302 | 108.0     |
| C304-C305-N302 | 128(2)    |
| C304-C305-C306 | 124(2)    |
| C305-C306-H306 | 126.0     |
| C305-C306-C307 | 108.0     |
| C307-C306-H306 | 126.0     |
| C306-C307-H307 | 126.0     |
| C306-C307-C308 | 108.0     |
| C308-C307-H307 | 126.0     |
| C307-C308-N302 | 108.0     |
| C309-C308-N302 | 120(3)    |
| C309-C308-C307 | 132(3)    |
| C334-N307-Dy21 | 119.2(17) |
| C334-N307-C333 | 120.0     |
| C333-N307-Dy21 | 119.8(17) |
| N307-C334-H334 | 120.0     |
| N307-C334-C335 | 120.0     |
| C335-C334-H334 | 120.0     |
| C334-C335-H335 | 120.0     |
| C331-C335-C334 | 120.0     |
| C331-C335-H335 | 120.0     |
| C335-C331-C332 | 120.0     |
| C335-C331-C314 | 123(3)    |
| C332-C331-C314 | 116(3)    |
| C331-C332-H332 | 120.0     |
| C333-C332-C331 | 120.0     |
| C333-C332-H332 | 120.0     |
| N307-C333-H333 | 120.0     |
| C332-C333-N307 | 120.0     |
| C332-C333-H333 | 120.0     |
| C320-N301-H301 | 126.0     |
| C320-N301-C303 | 108.0     |
| C303-N301-H301 | 126.0     |
| N301-C320-C301 | 108.0     |
| C319-C320-N301 | 124(2)    |
| C319-C320-C301 | 128(2)    |
| C320-C301-H30A | 126.0     |
| C320-C301-C302 | 108.0     |
| C302-C301-H30A | 126.0     |
| C301-C302-H30B | 126.0     |
| C303-C302-C301 | 108.0     |
| C303-C302-H30B | 126.0     |
| C302-C303-N301 | 108.0     |
| C304-C303-N301 | 125(2)    |

|                              |           |
|------------------------------|-----------|
| C304-C303-C302               | 127(2)    |
| K51-N304-H304                | 79.7      |
| C315-N304-K51                | 99.2(13)  |
| C315-N304-H304               | 126.0     |
| C318-N304-K51                | 92.9(15)  |
| C318-N304-H304               | 126.0     |
| C318-N304-C315               | 108.0     |
| N304-C315-K51                | 57.5(11)  |
| N304-C315-C316               | 108.0     |
| C316-C315-K51                | 104.6(12) |
| C314-C315-K51                | 98(2)     |
| C314-C315-N304               | 120(3)    |
| C314-C315-C316               | 132(3)    |
| C315-C316-H316               | 126.0     |
| C317-C316-C315               | 108.0     |
| C317-C316-H316               | 126.0     |
| C316-C317-H317               | 126.0     |
| C316-C317-C318               | 108.0     |
| C318-C317-H317               | 126.0     |
| N304-C318-K51                | 62.5(13)  |
| N304-C318-C317               | 108.0     |
| C317-C318-K51                | 107.3(11) |
| C319-C318-K51                | 101(2)    |
| C319-C318-N304               | 128(2)    |
| C319-C318-C317               | 124(2)    |
| C324-N305-Dy21 <sup>#3</sup> | 119.9(16) |
| C324-N305-C323               | 120.0     |
| C323-N305-Dy21 <sup>#3</sup> | 118.5(16) |
| N305-C324-H324               | 120.0     |
| N305-C324-C325               | 120.0     |
| C325-C324-H324               | 120.0     |
| C324-C325-H325               | 120.0     |
| C321-C325-C324               | 120.0     |
| C321-C325-H325               | 120.0     |
| C325-C321-C322               | 120.0     |
| C325-C321-C304               | 120(3)    |
| C322-C321-C304               | 119(3)    |
| C321-C322-H322               | 120.0     |
| C323-C322-C321               | 120.0     |
| C323-C322-H322               | 120.0     |
| N305-C323-H323               | 120.0     |
| C322-C323-N305               | 120.0     |
| C322-C323-H323               | 120.0     |
| C328-N306-Dy11               | 121(3)    |
| C329-N306-Dy11               | 110(4)    |
| C329-N306-C328               | 123(5)    |
| H10A-C109-H10B               | 109.5     |
| H10A-C109-H10C               | 109.5     |
| H10B-C109-H10C               | 109.5     |
| C108-C109-H10A               | 109.5     |
| C108-C109-H10B               | 109.5     |
| C108-C109-H10C               | 109.5     |
| C109-C108-C110               | 114(5)    |
| C109-C108-C111               | 108(4)    |
| C109-C108-C107               | 111(2)    |
| C110-C108-C111               | 111(5)    |
| C110-C108-C107               | 108(3)    |
| C111-C108-C107               | 105(2)    |
| C108-C110-H11A               | 109.5     |

|                              |           |
|------------------------------|-----------|
| C108-C110-H11B               | 109.5     |
| C108-C110-H11C               | 109.5     |
| H11A-C110-H11B               | 109.5     |
| H11A-C110-H11C               | 109.5     |
| H11B-C110-H11C               | 109.5     |
| C108-C111-H11D               | 109.5     |
| C108-C111-H11E               | 109.5     |
| C108-C111-H11F               | 109.5     |
| H11D-C111-H11E               | 109.5     |
| H11D-C111-H11F               | 109.5     |
| H11E-C111-H11F               | 109.5     |
| C224-C226-C227               | 106(2)    |
| C223-C226-C224               | 107(3)    |
| C223-C226-C227               | 107(2)    |
| C225-C226-C224               | 118(3)    |
| C225-C226-C223               | 107(3)    |
| C225-C226-C227               | 112(2)    |
| H11G-C112-H11H               | 109.5     |
| H11G-C112-H11I               | 109.5     |
| H11H-C112-H11I               | 109.5     |
| C115-C112-H11G               | 109.5     |
| C115-C112-H11H               | 109.5     |
| C115-C112-H11I               | 109.5     |
| H11J-C113-H11K               | 109.5     |
| H11J-C113-H11L               | 109.5     |
| H11K-C113-H11L               | 109.5     |
| C115-C113-H11J               | 109.5     |
| C115-C113-H11K               | 109.5     |
| C115-C113-H11L               | 109.5     |
| C337-C336-C340               | 120.0     |
| C337-C336-C319               | 122(3)    |
| C340-C336-C319               | 118(3)    |
| C336-C337-H337               | 120.0     |
| C338-C337-C336               | 120.0     |
| C338-C337-H337               | 120.0     |
| C337-C338-H338               | 120.0     |
| C337-C338-N308               | 120.0     |
| N308-C338-H338               | 120.0     |
| C338-N308-Dy11 <sup>#4</sup> | 126.7(17) |
| C339-N308-Dy11 <sup>#4</sup> | 109.1(17) |
| C339-N308-C338               | 120.0     |
| N308-C339-H339               | 120.0     |
| N308-C339-C340               | 120.0     |
| C340-C339-H339               | 120.0     |
| C336-C340-H340               | 120.0     |
| C339-C340-C336               | 120.0     |
| C339-C340-H340               | 120.0     |
| H11M-C114-H11N               | 109.5     |
| H11M-C114-H11O               | 109.5     |
| H11N-C114-H11O               | 109.5     |
| C115-C114-H11M               | 109.5     |
| C115-C114-H11N               | 109.5     |
| C115-C114-H11O               | 109.5     |
| H22A-C222-H22B               | 109.5     |
| H22A-C222-H22C               | 109.5     |
| H22B-C222-H22C               | 109.5     |
| C219-C222-H22A               | 109.5     |
| C219-C222-H22B               | 109.5     |
| C219-C222-H22C               | 109.5     |

|                |           |
|----------------|-----------|
| C112-C115-C114 | 111.9(19) |
| C112-C115-C116 | 114(3)    |
| C113-C115-C112 | 114(2)    |
| C113-C115-C114 | 99(5)     |
| C113-C115-C116 | 110(2)    |
| C114-C115-C116 | 106(2)    |
| C232-C230-C229 | 112(2)    |
| C232-C230-C231 | 113.0(18) |
| C232-C230-C233 | 104(4)    |
| C231-C230-C229 | 112(2)    |
| C231-C230-C233 | 110.6(17) |
| C233-C230-C229 | 104(2)    |
| O103-C116-C115 | 118(3)    |
| O103-C116-C117 | 123(3)    |
| C117-C116-C115 | 119.6(17) |
| C116-C117-H117 | 117.4     |
| C118-C117-C116 | 125.3(17) |
| C118-C117-H117 | 117.4     |
| O104-C118-C117 | 119(2)    |
| O104-C118-C119 | 119(3)    |
| C117-C118-C119 | 121.8(17) |
| C120-C119-C118 | 103(2)    |
| C121-C119-C118 | 113(3)    |
| C121-C119-C120 | 111(5)    |
| C121-C119-C122 | 111(4)    |
| C122-C119-C118 | 111(3)    |
| C122-C119-C120 | 108(4)    |
| C119-C120-H12A | 109.5     |
| C119-C120-H12B | 109.5     |
| C119-C120-H12C | 109.5     |
| H12A-C120-H12B | 109.5     |
| H12A-C120-H12C | 109.5     |
| H12B-C120-H12C | 109.5     |
| H22D-C220-H22E | 109.5     |
| H22D-C220-H22F | 109.5     |
| H22E-C220-H22F | 109.5     |
| C219-C220-H22D | 109.5     |
| C219-C220-H22E | 109.5     |
| C219-C220-H22F | 109.5     |
| C119-C121-H12D | 109.5     |
| C119-C121-H12E | 109.5     |
| C119-C121-H12F | 109.5     |
| H12D-C121-H12E | 109.5     |
| H12D-C121-H12F | 109.5     |
| H12E-C121-H12F | 109.5     |
| C226-C224-H22G | 109.5     |
| C226-C224-H22H | 109.5     |
| C226-C224-H22I | 109.5     |
| H22G-C224-H22H | 109.5     |
| H22G-C224-H22I | 109.5     |
| H22H-C224-H22I | 109.5     |
| C119-C122-H12G | 109.5     |
| C119-C122-H12H | 109.5     |
| C119-C122-H12I | 109.5     |
| H12G-C122-H12H | 109.5     |
| H12G-C122-H12I | 109.5     |
| H12H-C122-H12I | 109.5     |
| C227-C228-H228 | 118.0     |
| C229-C228-H228 | 118.0     |

|                |           |
|----------------|-----------|
| C229-C228-C227 | 124.0(15) |
| H12J-C123-H12K | 109.5     |
| H12J-C123-H12L | 109.5     |
| H12K-C123-H12L | 109.5     |
| C126-C123-H12J | 109.5     |
| C126-C123-H12K | 109.5     |
| C126-C123-H12L | 109.5     |
| C230-C232-H23A | 109.5     |
| C230-C232-H23B | 109.5     |
| C230-C232-H23C | 109.5     |
| H23A-C232-H23B | 109.5     |
| H23A-C232-H23C | 109.5     |
| H23B-C232-H23C | 109.5     |
| H12M-C124-H12N | 109.5     |
| H12M-C124-H12O | 109.5     |
| H12N-C124-H12O | 109.5     |
| C126-C124-H12M | 109.5     |
| C126-C124-H12N | 109.5     |
| C126-C124-H12O | 109.5     |
| C101-C104-C105 | 110(3)    |
| C101-C104-C102 | 112.5(18) |
| C101-C104-C103 | 112.1(19) |
| C102-C104-C105 | 112(2)    |
| C102-C104-C103 | 103(4)    |
| C103-C104-C105 | 108(2)    |
| H12P-C125-H12Q | 109.5     |
| H12P-C125-H12R | 109.5     |
| H12Q-C125-H12R | 109.5     |
| C126-C125-H12P | 109.5     |
| C126-C125-H12Q | 109.5     |
| C126-C125-H12R | 109.5     |
| O101-C105-C104 | 119(3)    |
| O101-C105-C106 | 121(2)    |
| C106-C105-C104 | 119.7(16) |
| C123-C126-C124 | 113(4)    |
| C123-C126-C127 | 105(2)    |
| C124-C126-C127 | 105(2)    |
| C125-C126-C123 | 105(4)    |
| C125-C126-C124 | 117(4)    |
| C125-C126-C127 | 111(2)    |
| O105-C127-C126 | 115(2)    |
| O105-C127-C128 | 123(2)    |
| C128-C127-C126 | 121.4(16) |
| C320-C319-C336 | 117(2)    |
| C318-C319-C320 | 128(3)    |
| C318-C319-C336 | 115(2)    |
| C127-C128-H128 | 117.3     |
| C127-C128-C129 | 125.4(17) |
| C129-C128-H128 | 117.3     |
| O106-C129-C128 | 124(2)    |
| O106-C129-C130 | 114(2)    |
| C128-C129-C130 | 121.2(16) |
| C131-C130-C129 | 113(2)    |
| C131-C130-C132 | 111.5(19) |
| C131-C130-C133 | 111(4)    |
| C132-C130-C129 | 107(2)    |
| C132-C130-C133 | 110.1(18) |
| C133-C130-C129 | 104(2)    |
| C130-C131-H13A | 109.5     |

|                |           |
|----------------|-----------|
| C130-C131-H13B | 109.5     |
| C130-C131-H13C | 109.5     |
| H13A-C131-H13B | 109.5     |
| H13A-C131-H13C | 109.5     |
| H13B-C131-H13C | 109.5     |
| C315-C314-C331 | 110(2)    |
| C315-C314-C313 | 132(3)    |
| C313-C314-C331 | 117(3)    |
| C130-C132-H13D | 109.5     |
| C130-C132-H13E | 109.5     |
| C130-C132-H13F | 109.5     |
| H13D-C132-H13E | 109.5     |
| H13D-C132-H13F | 109.5     |
| H13E-C132-H13F | 109.5     |
| C222-C219-C220 | 107(3)    |
| C222-C219-C218 | 106(2)    |
| C220-C219-C218 | 104(2)    |
| C221-C219-C222 | 106(4)    |
| C221-C219-C220 | 121(4)    |
| C221-C219-C218 | 112(2)    |
| C130-C133-H13G | 109.5     |
| C130-C133-H13H | 109.5     |
| C130-C133-H13I | 109.5     |
| H13G-C133-H13H | 109.5     |
| H13G-C133-H13I | 109.5     |
| H13H-C133-H13I | 109.5     |
| C219-C221-H22J | 109.5     |
| C219-C221-H22K | 109.5     |
| C219-C221-H22L | 109.5     |
| H22J-C221-H22K | 109.5     |
| H22J-C221-H22L | 109.5     |
| H22K-C221-H22L | 109.5     |
| C226-C223-H22M | 109.5     |
| C226-C223-H22N | 109.5     |
| C226-C223-H22O | 109.5     |
| H22M-C223-H22N | 109.5     |
| H22M-C223-H22O | 109.5     |
| H22N-C223-H22O | 109.5     |
| C226-C225-H22P | 109.5     |
| C226-C225-H22Q | 109.5     |
| C226-C225-H22R | 109.5     |
| H22P-C225-H22Q | 109.5     |
| H22P-C225-H22R | 109.5     |
| H22Q-C225-H22R | 109.5     |
| C104-C101-H10D | 109.5     |
| C104-C101-H10E | 109.5     |
| C104-C101-H10F | 109.5     |
| H10D-C101-H10E | 109.5     |
| H10D-C101-H10F | 109.5     |
| H10E-C101-H10F | 109.5     |
| O205-C227-C226 | 116(2)    |
| O205-C227-C228 | 123(2)    |
| C228-C227-C226 | 121.2(15) |
| O206-C229-C230 | 114(2)    |
| O206-C229-C228 | 124(2)    |
| C228-C229-C230 | 121.3(15) |
| N306-C328-H328 | 117.7     |
| N306-C328-C327 | 125(4)    |
| C327-C328-H328 | 117.7     |

|                |           |
|----------------|-----------|
| C230-C231-H23D | 109.5     |
| C230-C231-H23E | 109.5     |
| C230-C231-H23F | 109.5     |
| H23D-C231-H23E | 109.5     |
| H23D-C231-H23F | 109.5     |
| H23E-C231-H23F | 109.5     |
| C230-C233-H23G | 109.5     |
| C230-C233-H23H | 109.5     |
| C230-C233-H23I | 109.5     |
| H23G-C233-H23H | 109.5     |
| H23G-C233-H23I | 109.5     |
| H23H-C233-H23I | 109.5     |
| C104-C102-H10G | 109.5     |
| C104-C102-H10H | 109.5     |
| C104-C102-H10I | 109.5     |
| H10G-C102-H10H | 109.5     |
| H10G-C102-H10I | 109.5     |
| H10H-C102-H10I | 109.5     |
| C104-C103-H10J | 109.5     |
| C104-C103-H10K | 109.5     |
| C104-C103-H10L | 109.5     |
| H10J-C103-H10K | 109.5     |
| H10J-C103-H10L | 109.5     |
| H10K-C103-H10L | 109.5     |
| C305-C304-C303 | 128(3)    |
| C305-C304-C321 | 115(2)    |
| C303-C304-C321 | 117(2)    |
| C326-C330-H330 | 120.7     |
| C329-C330-H330 | 120.7     |
| C329-C330-C326 | 119(5)    |
| H21G-C213-H21H | 109.5     |
| H21G-C213-H21I | 109.5     |
| H21H-C213-H21I | 109.5     |
| C215-C213-H21G | 109.5     |
| C215-C213-H21H | 109.5     |
| C215-C213-H21I | 109.5     |
| H21J-C214-H21K | 109.5     |
| H21J-C214-H21L | 109.5     |
| H21K-C214-H21L | 109.5     |
| C215-C214-H21J | 109.5     |
| C215-C214-H21K | 109.5     |
| C215-C214-H21L | 109.5     |
| C213-C215-C216 | 112(2)    |
| C213-C215-C212 | 112.9(18) |
| C214-C215-C213 | 113.6(19) |
| C214-C215-C216 | 113(2)    |
| C214-C215-C212 | 100(4)    |
| C212-C215-C216 | 103(2)    |
| C105-C106-H106 | 116.7     |
| C105-C106-C107 | 126.6(17) |
| C107-C106-H106 | 116.7     |
| O203-C216-C215 | 115(2)    |
| O203-C216-C217 | 124(2)    |
| C217-C216-C215 | 121.4(16) |
| O102-C107-C108 | 118(3)    |
| O102-C107-C106 | 122(2)    |
| C106-C107-C108 | 120.1(16) |
| C216-C217-H217 | 118.1     |
| C216-C217-C218 | 123.8(16) |

|                |           |
|----------------|-----------|
| C218–C217–H217 | 118.1     |
| O204–C218–C219 | 117(2)    |
| O204–C218–C217 | 123(2)    |
| C217–C218–C219 | 120.7(16) |
| C205–C206–C207 | 122(4)    |
| C205–C206–H206 | 119.1     |
| C207–C206–H206 | 119.1     |
| C310–C311–H311 | 126.0     |
| C312–C311–H311 | 126.0     |
| C312–C311–C310 | 108.0     |
| N303–C310–C311 | 108.0     |
| C309–C310–C311 | 128(3)    |
| C309–C310–N303 | 124(3)    |
| C310–N303–H303 | 126.0     |
| C310–N303–C313 | 108.0     |
| C313–N303–H303 | 126.0     |
| C314–C313–N303 | 123(3)    |
| C314–C313–C312 | 128(3)    |
| C312–C313–N303 | 108.0     |
| C311–C312–C313 | 108.0     |
| C311–C312–H312 | 126.0     |
| C313–C312–H312 | 126.0     |
| C308–C309–C310 | 132(3)    |
| C308–C309–C326 | 113(2)    |
| C310–C309–C326 | 115(2)    |
| C330–C326–C309 | 126(4)    |
| C330–C326–C327 | 122(4)    |
| C327–C326–C309 | 111(4)    |
| N306–C329–C330 | 122(6)    |
| N306–C329–H329 | 119.1     |
| C330–C329–H329 | 119.1     |
| C215–C212–H21M | 109.5     |
| C215–C212–H21N | 109.5     |
| C215–C212–H21O | 109.5     |
| H21M–C212–H21N | 109.5     |
| H21M–C212–H21O | 109.5     |
| H21N–C212–H21O | 109.5     |
| C328–C327–C326 | 110(4)    |
| C328–C327–H327 | 125.1     |
| C326–C327–H327 | 125.1     |

Symmetry transformations used to generate equivalent atoms:

#1: +X, 0.5-Y, 0.5+Z; #2: 1+X, 0.5-Y, 0.5+Z; #3: -1+X, 0.5-Y, -0.5+Z; #4: +X, 0.5-Y, -0.5+Z;

**Table S5.** Bond lengths [Å] and angles [°] for **2**.

---

|              |           |
|--------------|-----------|
| Tb(1)-O(4)   | 2.293(5)  |
| Tb(1)-O(1)   | 2.309(5)  |
| Tb(1)-O(2)   | 2.326(6)  |
| Tb(1)-O(3)   | 2.333(5)  |
| Tb(1)-O(5)   | 2.335(6)  |
| Tb(1)-O(6)   | 2.337(5)  |
| Tb(1)-N(1)   | 2.579(6)  |
| Tb(1)-N(6)#1 | 2.602(6)  |
| Tb(2)-O(9)   | 2.290(6)  |
| Tb(2)-O(11)  | 2.291(5)  |
| Tb(2)-O(8)   | 2.338(6)  |
| Tb(2)-O(10)  | 2.350(6)  |
| Tb(2)-O(12)  | 2.353(5)  |
| Tb(2)-O(7)   | 2.363(5)  |
| Tb(2)-N(8)   | 2.611(6)  |
| Tb(2)-N(7)#2 | 2.673(6)  |
| Cu(1)-N(3)   | 1.995(6)  |
| Cu(1)-N(5)   | 1.998(6)  |
| Cu(1)-N(2)   | 2.019(6)  |
| Cu(1)-N(4)   | 2.020(5)  |
| O(1)-C(1)    | 1.253(10) |
| O(2)-C(3)    | 1.263(10) |
| O(3)-C(12)   | 1.249(9)  |
| O(4)-C(14)   | 1.253(9)  |
| O(5)-C(23)   | 1.228(11) |
| O(6)-C(25)   | 1.246(10) |
| O(7)-C(74)   | 1.261(10) |
| O(8)-C(76)   | 1.247(10) |
| O(9)-C(85)   | 1.286(11) |
| O(10)-C(87)  | 1.288(11) |
| O(11)-C(96)  | 1.246(10) |
| O(12)-C(98)  | 1.270(11) |
| N(1)-C(34)   | 1.313(12) |
| N(1)-C(38)   | 1.326(12) |
| N(2)-C(43)   | 1.368(9)  |
| N(2)-C(40)   | 1.391(8)  |
| N(3)-C(50)   | 1.371(9)  |
| N(3)-C(53)   | 1.395(8)  |
| N(4)-C(63)   | 1.375(9)  |
| N(4)-C(60)   | 1.394(8)  |
| N(5)-C(70)   | 1.380(10) |
| N(5)-C(73)   | 1.381(9)  |
| N(6)-C(57)   | 1.331(10) |
| N(6)-C(59)   | 1.332(10) |
| N(7)-C(67)   | 1.325(10) |
| N(7)-C(69)   | 1.340(10) |
| N(8)-C(49)   | 1.338(10) |
| N(8)-C(47)   | 1.339(10) |
| C(1)-C(2)    | 1.396(14) |
| C(1)-C(4)    | 1.554(13) |
| C(1A)-C(99)  | 1.53(2)   |
| C(1A)-H(1AA) | 0.9800    |
| C(1A)-H(1AB) | 0.9800    |
| C(1A)-H(1AC) | 0.9800    |
| C(1B)-C(103) | 1.51(4)   |
| C(1B)-H(1BA) | 0.9800    |
| C(1B)-H(1BB) | 0.9800    |
| C(1B)-H(1BC) | 0.9800    |
| C(1C)-C(103) | 1.57(3)   |

|              |           |
|--------------|-----------|
| C(1C)-H(1CA) | 0.9800    |
| C(1C)-H(1CB) | 0.9800    |
| C(1C)-H(1CC) | 0.9800    |
| C(1D)-C(103) | 1.51(3)   |
| C(1D)-H(1DA) | 0.9800    |
| C(1D)-H(1DB) | 0.9800    |
| C(1D)-H(1DC) | 0.9800    |
| C(2)-C(3)    | 1.409(14) |
| C(2)-H(2)    | 0.9500    |
| C(3)-C(8)    | 1.545(14) |
| C(4)-C(6')   | 1.503(14) |
| C(4)-C(7)    | 1.511(16) |
| C(4)-C(5)    | 1.514(15) |
| C(4)-C(6)    | 1.521(15) |
| C(4)-C(5')   | 1.523(15) |
| C(4)-C(7')   | 1.530(15) |
| C(5)-H(5A)   | 0.9800    |
| C(5)-H(5B)   | 0.9800    |
| C(5)-H(5C)   | 0.9800    |
| C(5')-H(5'A) | 0.9800    |
| C(5')-H(5'B) | 0.9800    |
| C(5')-H(5'C) | 0.9800    |
| C(6)-H(6A)   | 0.9800    |
| C(6)-H(6B)   | 0.9800    |
| C(6)-H(6C)   | 0.9800    |
| C(6')-H(6'A) | 0.9800    |
| C(6')-H(6'B) | 0.9800    |
| C(6')-H(6'C) | 0.9800    |
| C(7)-H(7A)   | 0.9800    |
| C(7)-H(7B)   | 0.9800    |
| C(7)-H(7C)   | 0.9800    |
| C(7')-H(7'A) | 0.9800    |
| C(7')-H(7'B) | 0.9800    |
| C(7')-H(7'C) | 0.9800    |
| C(8)-C(11)   | 1.499(15) |
| C(8)-C(9)    | 1.525(15) |
| C(8)-C(10)   | 1.554(16) |
| C(9)-H(9A)   | 0.9800    |
| C(9)-H(9B)   | 0.9800    |
| C(9)-H(9C)   | 0.9800    |
| C(10)-H(10A) | 0.9800    |
| C(10)-H(10B) | 0.9800    |
| C(10)-H(10C) | 0.9800    |
| C(11)-H(11A) | 0.9800    |
| C(11)-H(11B) | 0.9800    |
| C(11)-H(11C) | 0.9800    |
| C(12)-C(13)  | 1.408(11) |
| C(12)-C(15)  | 1.559(10) |
| C(13)-C(14)  | 1.410(11) |
| C(13)-H(13)  | 0.9500    |
| C(14)-C(19)  | 1.552(10) |
| C(15)-C(18)  | 1.504(12) |
| C(15)-C(16)  | 1.507(14) |
| C(15)-C(17)  | 1.531(12) |
| C(16)-H(16A) | 0.9800    |
| C(16)-H(16B) | 0.9800    |
| C(16)-H(16C) | 0.9800    |
| C(17)-H(17A) | 0.9800    |
| C(17)-H(17B) | 0.9800    |
| C(17)-H(17C) | 0.9800    |
| C(18)-H(18A) | 0.9800    |
| C(18)-H(18B) | 0.9800    |

|              |           |
|--------------|-----------|
| C(18)-H(18C) | 0.9800    |
| C(19)-C(22)  | 1.503(13) |
| C(19)-C(20)  | 1.508(13) |
| C(19)-C(21)  | 1.523(13) |
| C(20)-H(20A) | 0.9800    |
| C(20)-H(20B) | 0.9800    |
| C(20)-H(20C) | 0.9800    |
| C(21)-H(21A) | 0.9800    |
| C(21)-H(21B) | 0.9800    |
| C(21)-H(21C) | 0.9800    |
| C(22)-H(22A) | 0.9800    |
| C(22)-H(22B) | 0.9800    |
| C(22)-H(22C) | 0.9800    |
| C(23)-C(24)  | 1.433(12) |
| C(23)-C(26)  | 1.556(12) |
| C(24)-C(25)  | 1.402(11) |
| C(24)-H(24)  | 0.9500    |
| C(25)-C(30)  | 1.540(11) |
| C(26)-C(29)  | 1.507(15) |
| C(26)-C(28)  | 1.513(15) |
| C(26)-C(27)  | 1.526(15) |
| C(27)-H(27A) | 0.9800    |
| C(27)-H(27B) | 0.9800    |
| C(27)-H(27C) | 0.9800    |
| C(28)-H(28A) | 0.9800    |
| C(28)-H(28B) | 0.9800    |
| C(28)-H(28C) | 0.9800    |
| C(29)-H(29A) | 0.9800    |
| C(29)-H(29B) | 0.9800    |
| C(29)-H(29C) | 0.9800    |
| C(30)-C(32)  | 1.519(12) |
| C(30)-C(33)  | 1.519(13) |
| C(30)-C(31)  | 1.525(13) |
| C(31)-H(31A) | 0.9800    |
| C(31)-H(31B) | 0.9800    |
| C(31)-H(31C) | 0.9800    |
| C(32)-H(32A) | 0.9800    |
| C(32)-H(32B) | 0.9800    |
| C(32)-H(32C) | 0.9800    |
| C(33)-H(33A) | 0.9800    |
| C(33)-H(33B) | 0.9800    |
| C(33)-H(33C) | 0.9800    |
| C(34)-C(35)  | 1.393(11) |
| C(34)-H(34)  | 0.9500    |
| C(35)-C(36)  | 1.369(13) |
| C(35)-H(35)  | 0.9500    |
| C(36)-C(37)  | 1.371(13) |
| C(36)-C(39)  | 1.503(9)  |
| C(37)-C(38)  | 1.397(10) |
| C(37)-H(37)  | 0.9500    |
| C(38)-H(38)  | 0.9500    |
| C(39)-C(73)  | 1.387(11) |
| C(39)-C(40)  | 1.388(10) |
| C(40)-C(41)  | 1.418(10) |
| C(41)-C(42)  | 1.354(11) |
| C(41)-H(41)  | 0.9500    |
| C(42)-C(43)  | 1.443(9)  |
| C(42)-H(42)  | 0.9500    |
| C(43)-C(44)  | 1.408(10) |
| C(44)-C(50)  | 1.411(9)  |
| C(44)-C(45)  | 1.485(10) |
| C(45)-C(46)  | 1.388(11) |

|              |           |
|--------------|-----------|
| C(45)-C(48)  | 1.389(11) |
| C(46)-C(47)  | 1.376(10) |
| C(46)-H(46)  | 0.9500    |
| C(47)-H(47)  | 0.9500    |
| C(48)-C(49)  | 1.397(11) |
| C(48)-H(48)  | 0.9500    |
| C(49)-H(49)  | 0.9500    |
| C(50)-C(51)  | 1.445(9)  |
| C(51)-C(52)  | 1.339(10) |
| C(51)-H(51)  | 0.9500    |
| C(52)-C(53)  | 1.432(10) |
| C(52)-H(52)  | 0.9500    |
| C(53)-C(54)  | 1.379(10) |
| C(54)-C(60)  | 1.391(10) |
| C(54)-C(55)  | 1.494(8)  |
| C(55)-C(58)  | 1.390(11) |
| C(55)-C(56)  | 1.402(11) |
| C(56)-C(57)  | 1.388(9)  |
| C(56)-H(56)  | 0.9500    |
| C(57)-H(57)  | 0.9500    |
| C(58)-C(59)  | 1.374(10) |
| C(58)-H(58)  | 0.9500    |
| C(59)-H(59)  | 0.9500    |
| C(60)-C(61)  | 1.415(10) |
| C(61)-C(62)  | 1.348(10) |
| C(61)-H(61)  | 0.9500    |
| C(62)-C(63)  | 1.437(9)  |
| C(62)-H(62)  | 0.9500    |
| C(63)-C(64)  | 1.403(10) |
| C(64)-C(70)  | 1.416(10) |
| C(64)-C(65)  | 1.480(10) |
| C(65)-C(66)  | 1.384(11) |
| C(65)-C(68)  | 1.395(11) |
| C(66)-C(67)  | 1.405(10) |
| C(66)-H(66)  | 0.9500    |
| C(67)-H(67)  | 0.9500    |
| C(68)-C(69)  | 1.367(11) |
| C(68)-H(68)  | 0.9500    |
| C(69)-H(69)  | 0.9500    |
| C(70)-C(71)  | 1.418(10) |
| C(71)-C(72)  | 1.355(11) |
| C(71)-H(71)  | 0.9500    |
| C(72)-C(73)  | 1.440(11) |
| C(72)-H(72)  | 0.9500    |
| C(74)-C(75)  | 1.394(13) |
| C(74)-C(77)  | 1.539(11) |
| C(75)-C(76)  | 1.399(13) |
| C(75)-H(75)  | 0.9500    |
| C(76)-C(81)  | 1.529(14) |
| C(77)-C(78)  | 1.494(16) |
| C(77)-C(80)  | 1.528(16) |
| C(77)-C(79)  | 1.546(14) |
| C(78)-H(78A) | 0.9800    |
| C(78)-H(78B) | 0.9800    |
| C(78)-H(78C) | 0.9800    |
| C(79)-H(79A) | 0.9800    |
| C(79)-H(79B) | 0.9800    |
| C(79)-H(79C) | 0.9800    |
| C(80)-H(80A) | 0.9800    |
| C(80)-H(80B) | 0.9800    |
| C(80)-H(80C) | 0.9800    |
| C(81)-C(82)  | 1.516(13) |

|               |           |
|---------------|-----------|
| C(81)-C(83')  | 1.531(19) |
| C(81)-C(82')  | 1.532(19) |
| C(81)-C(84')  | 1.533(19) |
| C(81)-C(84)   | 1.535(14) |
| C(81)-C(83)   | 1.542(13) |
| C(82)-H(82A)  | 0.9800    |
| C(82)-H(82B)  | 0.9800    |
| C(82)-H(82C)  | 0.9800    |
| C(82')-H(82D) | 0.9800    |
| C(82')-H(82E) | 0.9800    |
| C(82')-H(82F) | 0.9800    |
| C(83)-H(83A)  | 0.9800    |
| C(83)-H(83B)  | 0.9800    |
| C(83)-H(83C)  | 0.9800    |
| C(83')-H(83D) | 0.9800    |
| C(83')-H(83E) | 0.9800    |
| C(83')-H(83F) | 0.9800    |
| C(84)-H(84A)  | 0.9800    |
| C(84)-H(84B)  | 0.9800    |
| C(84)-H(84C)  | 0.9800    |
| C(84')-H(84D) | 0.9800    |
| C(84')-H(84E) | 0.9800    |
| C(84')-H(84F) | 0.9800    |
| C(85)-C(86)   | 1.380(16) |
| C(85)-C(88')  | 1.52(10)  |
| C(85)-C(88)   | 1.55(2)   |
| C(86)-C(87)   | 1.367(16) |
| C(86)-H(86)   | 0.9500    |
| C(87)-C(92)   | 1.531(18) |
| C(87)-C(92')  | 1.57(2)   |
| C(88)-C(91)   | 1.505(14) |
| C(88)-C(90)   | 1.508(13) |
| C(88)-C(89)   | 1.531(13) |
| C(88')-C(91') | 1.512(18) |
| C(88')-C(90') | 1.519(18) |
| C(88')-C(89') | 1.519(18) |
| C(89)-H(89A)  | 0.9800    |
| C(89)-H(89B)  | 0.9800    |
| C(89)-H(89C)  | 0.9800    |
| C(89')-H(89D) | 0.9800    |
| C(89')-H(89E) | 0.9800    |
| C(89')-H(89F) | 0.9800    |
| C(90)-H(90A)  | 0.9800    |
| C(90)-H(90B)  | 0.9800    |
| C(90)-H(90C)  | 0.9800    |
| C(90')-H(90D) | 0.9800    |
| C(90')-H(90E) | 0.9800    |
| C(90')-H(90F) | 0.9800    |
| C(91)-H(91A)  | 0.9800    |
| C(91)-H(91B)  | 0.9800    |
| C(91)-H(91C)  | 0.9800    |
| C(91')-H(91D) | 0.9800    |
| C(91')-H(91E) | 0.9800    |
| C(91')-H(91F) | 0.9800    |
| C(92)-C(94)   | 1.491(15) |
| C(92)-C(93)   | 1.502(14) |
| C(92)-C(95)   | 1.517(14) |
| C(92')-C(93') | 1.515(18) |
| C(92')-C(94') | 1.516(18) |
| C(92')-C(95') | 1.517(17) |
| C(93)-H(93A)  | 0.9800    |
| C(93)-H(93B)  | 0.9800    |

|                 |           |
|-----------------|-----------|
| C(93)-H(93C)    | 0.9800    |
| C(93')-H(93D)   | 0.9800    |
| C(93'')-H(93E)  | 0.9800    |
| C(93''')-H(93F) | 0.9800    |
| C(94)-H(94A)    | 0.9800    |
| C(94)-H(94B)    | 0.9800    |
| C(94)-H(94C)    | 0.9800    |
| C(94')-H(94D)   | 0.9800    |
| C(94'')-H(94E)  | 0.9800    |
| C(94''')-H(94F) | 0.9800    |
| C(95)-H(95A)    | 0.9800    |
| C(95)-H(95B)    | 0.9800    |
| C(95)-H(95C)    | 0.9800    |
| C(95')-H(95D)   | 0.9800    |
| C(95'')-H(95E)  | 0.9800    |
| C(95''')-H(95F) | 0.9800    |
| C(96)-C(97)     | 1.388(14) |
| C(96)-C(99)     | 1.560(12) |
| C(97)-C(98)     | 1.385(14) |
| C(97)-H(97)     | 0.9500    |
| C(98)-C(103)    | 1.542(14) |
| C(99)-C(100)    | 1.495(16) |
| C(99)-C(102)    | 1.501(16) |
| C(99)-C(101)    | 1.518(17) |
| C(100)-H(10D)   | 0.9800    |
| C(100)-H(10E)   | 0.9800    |
| C(100)-H(10F)   | 0.9800    |
| C(101)-H(10G)   | 0.9800    |
| C(101)-H(10H)   | 0.9800    |
| C(101)-H(10I)   | 0.9800    |
| C(102)-H(10J)   | 0.9800    |
| C(102)-H(10K)   | 0.9800    |
| C(102)-H(10L)   | 0.9800    |
| C(103)-C(106)   | 1.46(2)   |
| C(103)-C(105)   | 1.46(2)   |
| C(103)-C(104)   | 1.56(2)   |
| C(104)-H(10M)   | 0.9800    |
| C(104)-H(10N)   | 0.9800    |
| C(104)-H(10O)   | 0.9800    |
| C(105)-H(10P)   | 0.9800    |
| C(105)-H(10Q)   | 0.9800    |
| C(105)-H(10R)   | 0.9800    |
| C(106)-H(10S)   | 0.9800    |
| C(106)-H(10T)   | 0.9800    |
| C(106)-H(10U)   | 0.9800    |
| Cs(1)-O(15)     | 2.914(7)  |
| Cs(1)-O(13)     | 2.929(7)  |
| Cs(1)-O(18)     | 2.950(7)  |
| Cs(1)-O(16)     | 2.965(6)  |
| Cs(1)-O(14)     | 2.970(6)  |
| Cs(1)-O(17)     | 2.975(8)  |
| Cs(1)-N(9)      | 3.078(9)  |
| Cs(1)-N(10)     | 3.113(7)  |
| O(13)-C(109)    | 1.411(13) |
| O(13)-C(108)    | 1.464(14) |
| O(14)-C(111)    | 1.422(12) |
| O(14)-C(110)    | 1.435(12) |
| O(15)-C(114)    | 1.395(15) |
| O(15)-C(115)    | 1.417(13) |
| O(16)-C(117)    | 1.376(12) |
| O(16)-C(116)    | 1.440(12) |
| O(17)-C(121)    | 1.444(15) |

|                 |            |
|-----------------|------------|
| O(17)-C(120)    | 1.457(14)  |
| O(18)-C(123)    | 1.415(13)  |
| O(18)-C(122)    | 1.441(14)  |
| N(9)-C(113)     | 1.426(17)  |
| N(9)-C(119)     | 1.460(19)  |
| N(9)-C(107)     | 1.477(14)  |
| N(10)-C(124)    | 1.426(14)  |
| N(10)-C(118)    | 1.454(13)  |
| N(10)-C(112)    | 1.482(13)  |
| C(107)-C(108)   | 1.519(17)  |
| C(107)-H(10V)   | 0.9900     |
| C(107)-H(10W)   | 0.9900     |
| C(108)-H(10X)   | 0.9900     |
| C(108)-H(10Y)   | 0.9900     |
| C(109)-C(110)   | 1.482(18)  |
| C(109)-H        | 0.9900     |
| C(109)-H(10Z)   | 0.9900     |
| C(110)-H(11D)   | 0.9900     |
| C(110)-H(11E)   | 0.9900     |
| C(111)-C(112)   | 1.510(15)  |
| C(111)-H(11F)   | 0.9900     |
| C(111)-H(11G)   | 0.9900     |
| C(112)-H(11H)   | 0.9900     |
| C(112)-H(11I)   | 0.9900     |
| C(113)-C(114)   | 1.509(17)  |
| C(113)-H(11J)   | 0.9900     |
| C(113)-H(11K)   | 0.9900     |
| C(114)-H(11L)   | 0.9900     |
| C(114)-H(11M)   | 0.9900     |
| C(115)-C(116)   | 1.495(16)  |
| C(115)-H(11N)   | 0.9900     |
| C(115)-H(11O)   | 0.9900     |
| C(116)-H(11P)   | 0.9900     |
| C(116)-H(11Q)   | 0.9900     |
| C(117)-C(118)   | 1.469(16)  |
| C(117)-H(11R)   | 0.9900     |
| C(117)-H(11S)   | 0.9900     |
| C(118)-H(11T)   | 0.9900     |
| C(118)-H(11U)   | 0.9900     |
| C(119)-C(120)   | 1.52(2)    |
| C(119)-H(11V)   | 0.9900     |
| C(119)-H(11W)   | 0.9900     |
| C(120)-H(12A)   | 0.9900     |
| C(120)-H(12B)   | 0.9900     |
| C(121)-C(122)   | 1.464(18)  |
| C(121)-H(12C)   | 0.9900     |
| C(121)-H(12D)   | 0.9900     |
| C(122)-H(12E)   | 0.9900     |
| C(122)-H(12F)   | 0.9900     |
| C(123)-C(124)   | 1.540(16)  |
| C(123)-H(12G)   | 0.9900     |
| C(123)-H(12H)   | 0.9900     |
| C(124)-H(12I)   | 0.9900     |
| C(124)-H(12J)   | 0.9900     |
| O(4)-Tb(1)-O(1) | 145.47(17) |
| O(4)-Tb(1)-O(2) | 107.8(2)   |
| O(1)-Tb(1)-O(2) | 73.1(2)    |
| O(4)-Tb(1)-O(3) | 71.87(17)  |
| O(1)-Tb(1)-O(3) | 137.11(18) |
| O(2)-Tb(1)-O(3) | 74.47(19)  |
| O(4)-Tb(1)-O(5) | 82.6(2)    |

|                    |            |
|--------------------|------------|
| O(1)-Tb(1)-O(5)    | 117.3(2)   |
| O(2)-Tb(1)-O(5)    | 144.72(18) |
| O(3)-Tb(1)-O(5)    | 77.3(2)    |
| O(4)-Tb(1)-O(6)    | 82.57(19)  |
| O(1)-Tb(1)-O(6)    | 78.48(19)  |
| O(2)-Tb(1)-O(6)    | 142.32(18) |
| O(3)-Tb(1)-O(6)    | 141.5(2)   |
| O(5)-Tb(1)-O(6)    | 71.15(19)  |
| O(4)-Tb(1)-N(1)    | 141.4(2)   |
| O(1)-Tb(1)-N(1)    | 73.08(19)  |
| O(2)-Tb(1)-N(1)    | 80.5(2)    |
| O(3)-Tb(1)-N(1)    | 74.58(19)  |
| O(5)-Tb(1)-N(1)    | 71.9(2)    |
| O(6)-Tb(1)-N(1)    | 114.3(2)   |
| O(4)-Tb(1)-N(6)#1  | 72.48(19)  |
| O(1)-Tb(1)-N(6)#1  | 75.01(18)  |
| O(2)-Tb(1)-N(6)#1  | 73.37(18)  |
| O(3)-Tb(1)-N(6)#1  | 120.65(19) |
| O(5)-Tb(1)-N(6)#1  | 140.7(2)   |
| O(6)-Tb(1)-N(6)#1  | 75.80(19)  |
| N(1)-Tb(1)-N(6)#1  | 143.4(2)   |
| O(9)-Tb(2)-O(11)   | 82.1(2)    |
| O(9)-Tb(2)-O(8)    | 81.3(2)    |
| O(11)-Tb(2)-O(8)   | 76.3(2)    |
| O(9)-Tb(2)-O(10)   | 71.2(2)    |
| O(11)-Tb(2)-O(10)  | 80.4(2)    |
| O(8)-Tb(2)-O(10)   | 146.0(2)   |
| O(9)-Tb(2)-O(12)   | 141.7(2)   |
| O(11)-Tb(2)-O(12)  | 72.4(2)    |
| O(8)-Tb(2)-O(12)   | 118.2(2)   |
| O(10)-Tb(2)-O(12)  | 76.7(2)    |
| O(9)-Tb(2)-O(7)    | 74.2(2)    |
| O(11)-Tb(2)-O(7)   | 142.94(19) |
| O(8)-Tb(2)-O(7)    | 72.30(19)  |
| O(10)-Tb(2)-O(7)   | 116.9(2)   |
| O(12)-Tb(2)-O(7)   | 140.93(18) |
| O(9)-Tb(2)-N(8)    | 110.8(2)   |
| O(11)-Tb(2)-N(8)   | 143.9(2)   |
| O(8)-Tb(2)-N(8)    | 137.4(2)   |
| O(10)-Tb(2)-N(8)   | 73.0(2)    |
| O(12)-Tb(2)-N(8)   | 78.0(2)    |
| O(7)-Tb(2)-N(8)    | 72.41(19)  |
| O(9)-Tb(2)-N(7)#2  | 146.2(2)   |
| O(11)-Tb(2)-N(7)#2 | 116.3(2)   |
| O(8)-Tb(2)-N(7)#2  | 76.5(2)    |
| O(10)-Tb(2)-N(7)#2 | 136.8(2)   |
| O(12)-Tb(2)-N(7)#2 | 72.0(2)    |
| O(7)-Tb(2)-N(7)#2  | 74.81(18)  |
| N(8)-Tb(2)-N(7)#2  | 71.9(2)    |
| N(3)-Cu(1)-N(5)    | 178.6(3)   |
| N(3)-Cu(1)-N(2)    | 89.3(2)    |
| N(5)-Cu(1)-N(2)    | 90.2(2)    |
| N(3)-Cu(1)-N(4)    | 90.6(2)    |
| N(5)-Cu(1)-N(4)    | 90.0(2)    |
| N(2)-Cu(1)-N(4)    | 179.8(3)   |
| C(1)-O(1)-Tb(1)    | 137.1(6)   |
| C(3)-O(2)-Tb(1)    | 137.2(6)   |
| C(12)-O(3)-Tb(1)   | 136.2(5)   |
| C(14)-O(4)-Tb(1)   | 135.5(5)   |
| C(23)-O(5)-Tb(1)   | 138.7(5)   |
| C(25)-O(6)-Tb(1)   | 138.8(5)   |
| C(74)-O(7)-Tb(2)   | 133.1(5)   |

|                     |          |
|---------------------|----------|
| C(76)-O(8)-Tb(2)    | 132.4(6) |
| C(85)-O(9)-Tb(2)    | 137.9(7) |
| C(87)-O(10)-Tb(2)   | 135.5(7) |
| C(96)-O(11)-Tb(2)   | 136.7(6) |
| C(98)-O(12)-Tb(2)   | 133.3(6) |
| C(34)-N(1)-C(38)    | 115.9(7) |
| C(34)-N(1)-Tb(1)    | 125.7(6) |
| C(38)-N(1)-Tb(1)    | 117.6(5) |
| C(43)-N(2)-C(40)    | 105.2(6) |
| C(43)-N(2)-Cu(1)    | 128.2(4) |
| C(40)-N(2)-Cu(1)    | 126.6(5) |
| C(50)-N(3)-C(53)    | 105.3(6) |
| C(50)-N(3)-Cu(1)    | 128.1(4) |
| C(53)-N(3)-Cu(1)    | 126.7(5) |
| C(63)-N(4)-C(60)    | 105.7(5) |
| C(63)-N(4)-Cu(1)    | 127.9(4) |
| C(60)-N(4)-Cu(1)    | 126.4(5) |
| C(70)-N(5)-C(73)    | 105.3(6) |
| C(70)-N(5)-Cu(1)    | 127.3(4) |
| C(73)-N(5)-Cu(1)    | 127.4(5) |
| C(57)-N(6)-C(59)    | 116.6(6) |
| C(57)-N(6)-Tb(1)#3  | 120.8(5) |
| C(59)-N(6)-Tb(1)#3  | 121.0(5) |
| C(67)-N(7)-C(69)    | 117.0(7) |
| C(67)-N(7)-Tb(2)#4  | 120.0(5) |
| C(69)-N(7)-Tb(2)#4  | 119.6(5) |
| C(49)-N(8)-C(47)    | 116.8(7) |
| C(49)-N(8)-Tb(2)    | 116.3(5) |
| C(47)-N(8)-Tb(2)    | 125.0(5) |
| O(1)-C(1)-C(2)      | 124.2(8) |
| O(1)-C(1)-C(4)      | 117.2(9) |
| C(2)-C(1)-C(4)      | 118.5(8) |
| C(99)-C(1A)-H(1AA)  | 109.5    |
| C(99)-C(1A)-H(1AB)  | 109.5    |
| H(1AA)-C(1A)-H(1AB) | 109.5    |
| C(99)-C(1A)-H(1AC)  | 109.5    |
| H(1AA)-C(1A)-H(1AC) | 109.5    |
| H(1AB)-C(1A)-H(1AC) | 109.5    |
| C(103)-C(1B)-H(1BA) | 109.5    |
| C(103)-C(1B)-H(1BB) | 109.5    |
| H(1BA)-C(1B)-H(1BB) | 109.5    |
| C(103)-C(1B)-H(1BC) | 109.5    |
| H(1BA)-C(1B)-H(1BC) | 109.5    |
| H(1BB)-C(1B)-H(1BC) | 109.5    |
| C(103)-C(1C)-H(1CA) | 109.5    |
| C(103)-C(1C)-H(1CB) | 109.5    |
| H(1CA)-C(1C)-H(1CB) | 109.5    |
| C(103)-C(1C)-H(1CC) | 109.5    |
| H(1CA)-C(1C)-H(1CC) | 109.5    |
| H(1CB)-C(1C)-H(1CC) | 109.5    |
| C(103)-C(1D)-H(1DA) | 109.5    |
| C(103)-C(1D)-H(1DB) | 109.5    |
| H(1DA)-C(1D)-H(1DB) | 109.5    |
| C(103)-C(1D)-H(1DC) | 109.5    |
| H(1DA)-C(1D)-H(1DC) | 109.5    |
| H(1DB)-C(1D)-H(1DC) | 109.5    |
| C(1)-C(2)-C(3)      | 125.0(9) |
| C(1)-C(2)-H(2)      | 117.5    |
| C(3)-C(2)-H(2)      | 117.5    |
| O(2)-C(3)-C(2)      | 122.9(9) |
| O(2)-C(3)-C(8)      | 115.6(9) |
| C(2)-C(3)-C(8)      | 121.5(9) |

|                     |           |
|---------------------|-----------|
| C(7)-C(4)-C(5)      | 123(3)    |
| C(7)-C(4)-C(6)      | 106(2)    |
| C(5)-C(4)-C(6)      | 106.3(19) |
| C(6')-C(4)-C(5')    | 111.4(15) |
| C(6')-C(4)-C(7')    | 107.0(15) |
| C(5')-C(4)-C(7')    | 103(2)    |
| C(6')-C(4)-C(1)     | 113.3(13) |
| C(7)-C(4)-C(1)      | 105.1(14) |
| C(5)-C(4)-C(1)      | 104.6(17) |
| C(6)-C(4)-C(1)      | 111.8(16) |
| C(5')-C(4)-C(1)     | 112.3(15) |
| C(7')-C(4)-C(1)     | 108.7(11) |
| C(4)-C(5)-H(5A)     | 109.5     |
| C(4)-C(5)-H(5B)     | 109.5     |
| H(5A)-C(5)-H(5B)    | 109.5     |
| C(4)-C(5)-H(5C)     | 109.5     |
| H(5A)-C(5)-H(5C)    | 109.5     |
| H(5B)-C(5)-H(5C)    | 109.5     |
| C(4)-C(5')-H(5'A)   | 109.5     |
| C(4)-C(5')-H(5'B)   | 109.5     |
| H(5'A)-C(5')-H(5'B) | 109.5     |
| C(4)-C(5')-H(5'C)   | 109.5     |
| H(5'A)-C(5')-H(5'C) | 109.5     |
| H(5'B)-C(5')-H(5'C) | 109.5     |
| C(4)-C(6)-H(6A)     | 109.5     |
| C(4)-C(6)-H(6B)     | 109.5     |
| H(6A)-C(6)-H(6B)    | 109.5     |
| C(4)-C(6)-H(6C)     | 109.5     |
| H(6A)-C(6)-H(6C)    | 109.5     |
| H(6B)-C(6)-H(6C)    | 109.5     |
| C(4)-C(6')-H(6'A)   | 109.5     |
| C(4)-C(6')-H(6'B)   | 109.5     |
| H(6'A)-C(6')-H(6'B) | 109.5     |
| C(4)-C(6')-H(6'C)   | 109.5     |
| H(6'A)-C(6')-H(6'C) | 109.5     |
| H(6'B)-C(6')-H(6'C) | 109.5     |
| C(4)-C(7)-H(7A)     | 109.5     |
| C(4)-C(7)-H(7B)     | 109.5     |
| H(7A)-C(7)-H(7B)    | 109.5     |
| C(4)-C(7)-H(7C)     | 109.5     |
| H(7A)-C(7)-H(7C)    | 109.5     |
| H(7B)-C(7)-H(7C)    | 109.5     |
| C(4)-C(7')-H(7'A)   | 109.5     |
| C(4)-C(7')-H(7'B)   | 109.5     |
| H(7'A)-C(7')-H(7'B) | 109.5     |
| C(4)-C(7')-H(7'C)   | 109.5     |
| H(7'A)-C(7')-H(7'C) | 109.5     |
| H(7'B)-C(7')-H(7'C) | 109.5     |
| C(11)-C(8)-C(9)     | 110.7(11) |
| C(11)-C(8)-C(3)     | 108.9(8)  |
| C(9)-C(8)-C(3)      | 105.9(8)  |
| C(11)-C(8)-C(10)    | 109.8(10) |
| C(9)-C(8)-C(10)     | 108.9(11) |
| C(3)-C(8)-C(10)     | 112.5(10) |
| C(8)-C(9)-H(9A)     | 109.5     |
| C(8)-C(9)-H(9B)     | 109.5     |
| H(9A)-C(9)-H(9B)    | 109.5     |
| C(8)-C(9)-H(9C)     | 109.5     |
| H(9A)-C(9)-H(9C)    | 109.5     |
| H(9B)-C(9)-H(9C)    | 109.5     |
| C(8)-C(10)-H(10A)   | 109.5     |
| C(8)-C(10)-H(10B)   | 109.5     |

|                     |          |
|---------------------|----------|
| H(10A)-C(10)-H(10B) | 109.5    |
| C(8)-C(10)-H(10C)   | 109.5    |
| H(10A)-C(10)-H(10C) | 109.5    |
| H(10B)-C(10)-H(10C) | 109.5    |
| C(8)-C(11)-H(11A)   | 109.5    |
| C(8)-C(11)-H(11B)   | 109.5    |
| H(11A)-C(11)-H(11B) | 109.5    |
| C(8)-C(11)-H(11C)   | 109.5    |
| H(11A)-C(11)-H(11C) | 109.5    |
| H(11B)-C(11)-H(11C) | 109.5    |
| O(3)-C(12)-C(13)    | 123.9(7) |
| O(3)-C(12)-C(15)    | 114.7(7) |
| C(13)-C(12)-C(15)   | 121.4(7) |
| C(12)-C(13)-C(14)   | 122.4(8) |
| C(12)-C(13)-H(13)   | 118.8    |
| C(14)-C(13)-H(13)   | 118.8    |
| O(4)-C(14)-C(13)    | 124.9(7) |
| O(4)-C(14)-C(19)    | 114.2(7) |
| C(13)-C(14)-C(19)   | 120.9(7) |
| C(18)-C(15)-C(16)   | 110.2(8) |
| C(18)-C(15)-C(17)   | 108.5(8) |
| C(16)-C(15)-C(17)   | 110.3(8) |
| C(18)-C(15)-C(12)   | 113.7(7) |
| C(16)-C(15)-C(12)   | 107.6(7) |
| C(17)-C(15)-C(12)   | 106.4(7) |
| C(15)-C(16)-H(16A)  | 109.5    |
| C(15)-C(16)-H(16B)  | 109.5    |
| H(16A)-C(16)-H(16B) | 109.5    |
| C(15)-C(16)-H(16C)  | 109.5    |
| H(16A)-C(16)-H(16C) | 109.5    |
| H(16B)-C(16)-H(16C) | 109.5    |
| C(15)-C(17)-H(17A)  | 109.5    |
| C(15)-C(17)-H(17B)  | 109.5    |
| H(17A)-C(17)-H(17B) | 109.5    |
| C(15)-C(17)-H(17C)  | 109.5    |
| H(17A)-C(17)-H(17C) | 109.5    |
| H(17B)-C(17)-H(17C) | 109.5    |
| C(15)-C(18)-H(18A)  | 109.5    |
| C(15)-C(18)-H(18B)  | 109.5    |
| H(18A)-C(18)-H(18B) | 109.5    |
| C(15)-C(18)-H(18C)  | 109.5    |
| H(18A)-C(18)-H(18C) | 109.5    |
| H(18B)-C(18)-H(18C) | 109.5    |
| C(22)-C(19)-C(20)   | 108.9(9) |
| C(22)-C(19)-C(21)   | 108.4(9) |
| C(20)-C(19)-C(21)   | 110.3(9) |
| C(22)-C(19)-C(14)   | 107.1(7) |
| C(20)-C(19)-C(14)   | 113.9(7) |
| C(21)-C(19)-C(14)   | 108.0(7) |
| C(19)-C(20)-H(20A)  | 109.5    |
| C(19)-C(20)-H(20B)  | 109.5    |
| H(20A)-C(20)-H(20B) | 109.5    |
| C(19)-C(20)-H(20C)  | 109.5    |
| H(20A)-C(20)-H(20C) | 109.5    |
| H(20B)-C(20)-H(20C) | 109.5    |
| C(19)-C(21)-H(21A)  | 109.5    |
| C(19)-C(21)-H(21B)  | 109.5    |
| H(21A)-C(21)-H(21B) | 109.5    |
| C(19)-C(21)-H(21C)  | 109.5    |
| H(21A)-C(21)-H(21C) | 109.5    |
| H(21B)-C(21)-H(21C) | 109.5    |
| C(19)-C(22)-H(22A)  | 109.5    |

|                     |           |
|---------------------|-----------|
| C(19)-C(22)-H(22B)  | 109.5     |
| H(22A)-C(22)-H(22B) | 109.5     |
| C(19)-C(22)-H(22C)  | 109.5     |
| H(22A)-C(22)-H(22C) | 109.5     |
| H(22B)-C(22)-H(22C) | 109.5     |
| O(5)-C(23)-C(24)    | 123.4(8)  |
| O(5)-C(23)-C(26)    | 116.7(8)  |
| C(24)-C(23)-C(26)   | 119.9(9)  |
| C(25)-C(24)-C(23)   | 123.7(9)  |
| C(25)-C(24)-H(24)   | 118.1     |
| C(23)-C(24)-H(24)   | 118.1     |
| O(6)-C(25)-C(24)    | 122.9(8)  |
| O(6)-C(25)-C(30)    | 116.3(7)  |
| C(24)-C(25)-C(30)   | 120.8(8)  |
| C(29)-C(26)-C(28)   | 112.2(10) |
| C(29)-C(26)-C(27)   | 108.5(10) |
| C(28)-C(26)-C(27)   | 108.0(9)  |
| C(29)-C(26)-C(23)   | 114.7(8)  |
| C(28)-C(26)-C(23)   | 105.1(8)  |
| C(27)-C(26)-C(23)   | 108.1(9)  |
| C(26)-C(27)-H(27A)  | 109.5     |
| C(26)-C(27)-H(27B)  | 109.5     |
| H(27A)-C(27)-H(27B) | 109.5     |
| C(26)-C(27)-H(27C)  | 109.5     |
| H(27A)-C(27)-H(27C) | 109.5     |
| H(27B)-C(27)-H(27C) | 109.5     |
| C(26)-C(28)-H(28A)  | 109.5     |
| C(26)-C(28)-H(28B)  | 109.5     |
| H(28A)-C(28)-H(28B) | 109.5     |
| C(26)-C(28)-H(28C)  | 109.5     |
| H(28A)-C(28)-H(28C) | 109.5     |
| H(28B)-C(28)-H(28C) | 109.5     |
| C(26)-C(29)-H(29A)  | 109.5     |
| C(26)-C(29)-H(29B)  | 109.5     |
| H(29A)-C(29)-H(29B) | 109.5     |
| C(26)-C(29)-H(29C)  | 109.5     |
| H(29A)-C(29)-H(29C) | 109.5     |
| H(29B)-C(29)-H(29C) | 109.5     |
| C(32)-C(30)-C(33)   | 108.9(8)  |
| C(32)-C(30)-C(31)   | 109.0(8)  |
| C(33)-C(30)-C(31)   | 111.3(8)  |
| C(32)-C(30)-C(25)   | 107.2(7)  |
| C(33)-C(30)-C(25)   | 106.8(7)  |
| C(31)-C(30)-C(25)   | 113.5(7)  |
| C(30)-C(31)-H(31A)  | 109.5     |
| C(30)-C(31)-H(31B)  | 109.5     |
| H(31A)-C(31)-H(31B) | 109.5     |
| C(30)-C(31)-H(31C)  | 109.5     |
| H(31A)-C(31)-H(31C) | 109.5     |
| H(31B)-C(31)-H(31C) | 109.5     |
| C(30)-C(32)-H(32A)  | 109.5     |
| C(30)-C(32)-H(32B)  | 109.5     |
| H(32A)-C(32)-H(32B) | 109.5     |
| C(30)-C(32)-H(32C)  | 109.5     |
| H(32A)-C(32)-H(32C) | 109.5     |
| H(32B)-C(32)-H(32C) | 109.5     |
| C(30)-C(33)-H(33A)  | 109.5     |
| C(30)-C(33)-H(33B)  | 109.5     |
| H(33A)-C(33)-H(33B) | 109.5     |
| C(30)-C(33)-H(33C)  | 109.5     |
| H(33A)-C(33)-H(33C) | 109.5     |
| H(33B)-C(33)-H(33C) | 109.5     |

|                   |          |
|-------------------|----------|
| N(1)-C(34)-C(35)  | 123.9(9) |
| N(1)-C(34)-H(34)  | 118.1    |
| C(35)-C(34)-H(34) | 118.1    |
| C(36)-C(35)-C(34) | 119.9(9) |
| C(36)-C(35)-H(35) | 120.0    |
| C(34)-C(35)-H(35) | 120.0    |
| C(35)-C(36)-C(37) | 116.8(7) |
| C(35)-C(36)-C(39) | 123.8(8) |
| C(37)-C(36)-C(39) | 119.4(8) |
| C(36)-C(37)-C(38) | 119.2(9) |
| C(36)-C(37)-H(37) | 120.4    |
| C(38)-C(37)-H(37) | 120.4    |
| N(1)-C(38)-C(37)  | 124.0(9) |
| N(1)-C(38)-H(38)  | 118.0    |
| C(37)-C(38)-H(38) | 118.0    |
| C(73)-C(39)-C(40) | 125.2(7) |
| C(73)-C(39)-C(36) | 117.9(7) |
| C(40)-C(39)-C(36) | 116.8(7) |
| C(39)-C(40)-N(2)  | 125.2(7) |
| C(39)-C(40)-C(41) | 124.5(6) |
| N(2)-C(40)-C(41)  | 110.3(6) |
| C(42)-C(41)-C(40) | 107.6(6) |
| C(42)-C(41)-H(41) | 126.2    |
| C(40)-C(41)-H(41) | 126.2    |
| C(41)-C(42)-C(43) | 106.4(7) |
| C(41)-C(42)-H(42) | 126.8    |
| C(43)-C(42)-H(42) | 126.8    |
| N(2)-C(43)-C(44)  | 125.3(6) |
| N(2)-C(43)-C(42)  | 110.5(6) |
| C(44)-C(43)-C(42) | 124.2(7) |
| C(43)-C(44)-C(50) | 123.1(6) |
| C(43)-C(44)-C(45) | 119.0(6) |
| C(50)-C(44)-C(45) | 117.9(6) |
| C(46)-C(45)-C(48) | 116.6(7) |
| C(46)-C(45)-C(44) | 123.8(7) |
| C(48)-C(45)-C(44) | 119.6(7) |
| C(47)-C(46)-C(45) | 120.1(7) |
| C(47)-C(46)-H(46) | 120.0    |
| C(45)-C(46)-H(46) | 120.0    |
| N(8)-C(47)-C(46)  | 123.7(8) |
| N(8)-C(47)-H(47)  | 118.1    |
| C(46)-C(47)-H(47) | 118.1    |
| C(45)-C(48)-C(49) | 120.0(8) |
| C(45)-C(48)-H(48) | 120.0    |
| C(49)-C(48)-H(48) | 120.0    |
| N(8)-C(49)-C(48)  | 122.8(7) |
| N(8)-C(49)-H(49)  | 118.6    |
| C(48)-C(49)-H(49) | 118.6    |
| N(3)-C(50)-C(44)  | 126.0(6) |
| N(3)-C(50)-C(51)  | 110.6(6) |
| C(44)-C(50)-C(51) | 123.2(7) |
| C(52)-C(51)-C(50) | 106.5(7) |
| C(52)-C(51)-H(51) | 126.8    |
| C(50)-C(51)-H(51) | 126.8    |
| C(51)-C(52)-C(53) | 108.3(6) |
| C(51)-C(52)-H(52) | 125.9    |
| C(53)-C(52)-H(52) | 125.9    |
| C(54)-C(53)-N(3)  | 125.8(6) |
| C(54)-C(53)-C(52) | 124.9(6) |
| N(3)-C(53)-C(52)  | 109.3(6) |
| C(53)-C(54)-C(60) | 125.3(6) |
| C(53)-C(54)-C(55) | 115.5(6) |

|                   |          |
|-------------------|----------|
| C(60)-C(54)-C(55) | 119.2(6) |
| C(58)-C(55)-C(56) | 117.0(6) |
| C(58)-C(55)-C(54) | 122.8(7) |
| C(56)-C(55)-C(54) | 120.1(7) |
| C(57)-C(56)-C(55) | 118.6(7) |
| C(57)-C(56)-H(56) | 120.7    |
| C(55)-C(56)-H(56) | 120.7    |
| N(6)-C(57)-C(56)  | 124.0(7) |
| N(6)-C(57)-H(57)  | 118.0    |
| C(56)-C(57)-H(57) | 118.0    |
| C(59)-C(58)-C(55) | 119.5(7) |
| C(59)-C(58)-H(58) | 120.3    |
| C(55)-C(58)-H(58) | 120.3    |
| N(6)-C(59)-C(58)  | 124.1(8) |
| N(6)-C(59)-H(59)  | 117.9    |
| C(58)-C(59)-H(59) | 117.9    |
| C(54)-C(60)-N(4)  | 125.1(6) |
| C(54)-C(60)-C(61) | 125.5(6) |
| N(4)-C(60)-C(61)  | 109.5(6) |
| C(62)-C(61)-C(60) | 108.2(6) |
| C(62)-C(61)-H(61) | 125.9    |
| C(60)-C(61)-H(61) | 125.9    |
| C(61)-C(62)-C(63) | 106.8(6) |
| C(61)-C(62)-H(62) | 126.6    |
| C(63)-C(62)-H(62) | 126.6    |
| N(4)-C(63)-C(64)  | 125.1(6) |
| N(4)-C(63)-C(62)  | 109.8(6) |
| C(64)-C(63)-C(62) | 125.0(7) |
| C(63)-C(64)-C(70) | 123.7(7) |
| C(63)-C(64)-C(65) | 118.8(6) |
| C(70)-C(64)-C(65) | 117.4(6) |
| C(66)-C(65)-C(68) | 115.7(7) |
| C(66)-C(65)-C(64) | 122.6(7) |
| C(68)-C(65)-C(64) | 121.7(7) |
| C(65)-C(66)-C(67) | 119.6(7) |
| C(65)-C(66)-H(66) | 120.2    |
| C(67)-C(66)-H(66) | 120.2    |
| N(7)-C(67)-C(66)  | 123.4(8) |
| N(7)-C(67)-H(67)  | 118.3    |
| C(66)-C(67)-H(67) | 118.3    |
| C(69)-C(68)-C(65) | 121.1(8) |
| C(69)-C(68)-H(68) | 119.4    |
| C(65)-C(68)-H(68) | 119.4    |
| N(7)-C(69)-C(68)  | 123.0(8) |
| N(7)-C(69)-H(69)  | 118.5    |
| C(68)-C(69)-H(69) | 118.5    |
| N(5)-C(70)-C(64)  | 125.9(7) |
| N(5)-C(70)-C(71)  | 110.1(6) |
| C(64)-C(70)-C(71) | 124.0(7) |
| C(72)-C(71)-C(70) | 108.3(7) |
| C(72)-C(71)-H(71) | 125.9    |
| C(70)-C(71)-H(71) | 125.9    |
| C(71)-C(72)-C(73) | 105.8(7) |
| C(71)-C(72)-H(72) | 127.1    |
| C(73)-C(72)-H(72) | 127.1    |
| N(5)-C(73)-C(39)  | 125.4(7) |
| N(5)-C(73)-C(72)  | 110.5(7) |
| C(39)-C(73)-C(72) | 124.2(7) |
| O(7)-C(74)-C(75)  | 123.4(8) |
| O(7)-C(74)-C(77)  | 115.3(8) |
| C(75)-C(74)-C(77) | 121.2(8) |
| C(74)-C(75)-C(76) | 125.2(8) |

|                      |           |
|----------------------|-----------|
| C(74)-C(75)-H(75)    | 117.4     |
| C(76)-C(75)-H(75)    | 117.4     |
| O(8)-C(76)-C(75)     | 124.8(8)  |
| O(8)-C(76)-C(81)     | 114.2(8)  |
| C(75)-C(76)-C(81)    | 121.0(8)  |
| C(78)-C(77)-C(80)    | 110.5(10) |
| C(78)-C(77)-C(74)    | 110.2(8)  |
| C(80)-C(77)-C(74)    | 104.4(9)  |
| C(78)-C(77)-C(79)    | 108.3(11) |
| C(80)-C(77)-C(79)    | 110.3(11) |
| C(74)-C(77)-C(79)    | 113.1(8)  |
| C(77)-C(78)-H(78A)   | 109.5     |
| C(77)-C(78)-H(78B)   | 109.5     |
| H(78A)-C(78)-H(78B)  | 109.5     |
| C(77)-C(78)-H(78C)   | 109.5     |
| H(78A)-C(78)-H(78C)  | 109.5     |
| H(78B)-C(78)-H(78C)  | 109.5     |
| C(77)-C(79)-H(79A)   | 109.5     |
| C(77)-C(79)-H(79B)   | 109.5     |
| H(79A)-C(79)-H(79B)  | 109.5     |
| C(77)-C(79)-H(79C)   | 109.5     |
| H(79A)-C(79)-H(79C)  | 109.5     |
| H(79B)-C(79)-H(79C)  | 109.5     |
| C(77)-C(80)-H(80A)   | 109.5     |
| C(77)-C(80)-H(80B)   | 109.5     |
| H(80A)-C(80)-H(80B)  | 109.5     |
| C(77)-C(80)-H(80C)   | 109.5     |
| H(80A)-C(80)-H(80C)  | 109.5     |
| H(80B)-C(80)-H(80C)  | 109.5     |
| C(82)-C(81)-C(76)    | 115.9(9)  |
| C(76)-C(81)-C(83')   | 105(8)    |
| C(76)-C(81)-C(82')   | 102(8)    |
| C(83')-C(81)-C(82')  | 114(4)    |
| C(76)-C(81)-C(84')   | 105(8)    |
| C(83')-C(81)-C(84')  | 114(4)    |
| C(82')-C(81)-C(84')  | 114(4)    |
| C(82)-C(81)-C(84)    | 110.2(13) |
| C(76)-C(81)-C(84)    | 105.7(10) |
| C(82)-C(81)-C(83)    | 107.9(12) |
| C(76)-C(81)-C(83)    | 108.7(9)  |
| C(84)-C(81)-C(83)    | 108.1(14) |
| C(81)-C(82)-H(82A)   | 109.5     |
| C(81)-C(82)-H(82B)   | 109.5     |
| H(82A)-C(82)-H(82B)  | 109.5     |
| C(81)-C(82)-H(82C)   | 109.5     |
| H(82A)-C(82)-H(82C)  | 109.5     |
| H(82B)-C(82)-H(82C)  | 109.5     |
| C(81)-C(82')-H(82D)  | 109.5     |
| C(81)-C(82')-H(82E)  | 109.5     |
| H(82D)-C(82')-H(82E) | 109.5     |
| C(81)-C(82')-H(82F)  | 109.5     |
| H(82D)-C(82')-H(82F) | 109.5     |
| H(82E)-C(82')-H(82F) | 109.5     |
| C(81)-C(83)-H(83A)   | 109.5     |
| C(81)-C(83)-H(83B)   | 109.5     |
| H(83A)-C(83)-H(83B)  | 109.5     |
| C(81)-C(83)-H(83C)   | 109.5     |
| H(83A)-C(83)-H(83C)  | 109.5     |
| H(83B)-C(83)-H(83C)  | 109.5     |
| C(81)-C(83')-H(83D)  | 109.5     |
| C(81)-C(83')-H(83E)  | 109.5     |
| H(83D)-C(83')-H(83E) | 109.5     |

|                      |           |
|----------------------|-----------|
| C(81)-C(83')-H(83F)  | 109.5     |
| H(83D)-C(83')-H(83F) | 109.5     |
| H(83E)-C(83')-H(83F) | 109.5     |
| C(81)-C(84)-H(84A)   | 109.5     |
| C(81)-C(84)-H(84B)   | 109.5     |
| H(84A)-C(84)-H(84B)  | 109.5     |
| C(81)-C(84)-H(84C)   | 109.5     |
| H(84A)-C(84)-H(84C)  | 109.5     |
| H(84B)-C(84)-H(84C)  | 109.5     |
| C(81)-C(84')-H(84D)  | 109.5     |
| C(81)-C(84')-H(84E)  | 109.5     |
| H(84D)-C(84')-H(84E) | 109.5     |
| C(81)-C(84')-H(84F)  | 109.5     |
| H(84D)-C(84')-H(84F) | 109.5     |
| H(84E)-C(84')-H(84F) | 109.5     |
| O(9)-C(85)-C(86)     | 123.3(9)  |
| O(9)-C(85)-C(88')    | 122(2)    |
| C(86)-C(85)-C(88')   | 113(2)    |
| O(9)-C(85)-C(88)     | 112.3(11) |
| C(86)-C(85)-C(88)    | 124.3(10) |
| C(87)-C(86)-C(85)    | 124.8(10) |
| C(87)-C(86)-H(86)    | 117.6     |
| C(85)-C(86)-H(86)    | 117.6     |
| O(10)-C(87)-C(86)    | 123.8(10) |
| O(10)-C(87)-C(92)    | 119.6(11) |
| C(86)-C(87)-C(92)    | 115.6(10) |
| O(10)-C(87)-C(92')   | 107.7(17) |
| C(86)-C(87)-C(92')   | 127.5(16) |
| C(91)-C(88)-C(90)    | 104.3(14) |
| C(91)-C(88)-C(89)    | 110.8(16) |
| C(90)-C(88)-C(89)    | 111.5(13) |
| C(91)-C(88)-C(85)    | 109.6(11) |
| C(90)-C(88)-C(85)    | 114.5(13) |
| C(89)-C(88)-C(85)    | 106.2(11) |
| C(91')-C(88')-C(90') | 109(6)    |
| C(91')-C(88')-C(89') | 98(5)     |
| C(90')-C(88')-C(89') | 125(8)    |
| C(91')-C(88')-C(85)  | 102(5)    |
| C(90')-C(88')-C(85)  | 114(6)    |
| C(89')-C(88')-C(85)  | 105(6)    |
| C(88)-C(89)-H(89A)   | 109.5     |
| C(88)-C(89)-H(89B)   | 109.5     |
| H(89A)-C(89)-H(89B)  | 109.5     |
| C(88)-C(89)-H(89C)   | 109.5     |
| H(89A)-C(89)-H(89C)  | 109.5     |
| H(89B)-C(89)-H(89C)  | 109.5     |
| C(88')-C(89')-H(89D) | 109.5     |
| C(88')-C(89')-H(89E) | 109.5     |
| H(89D)-C(89')-H(89E) | 109.5     |
| C(88')-C(89')-H(89F) | 109.5     |
| H(89D)-C(89')-H(89F) | 109.5     |
| H(89E)-C(89')-H(89F) | 109.5     |
| C(88)-C(90)-H(90A)   | 109.5     |
| C(88)-C(90)-H(90B)   | 109.5     |
| H(90A)-C(90)-H(90B)  | 109.5     |
| C(88)-C(90)-H(90C)   | 109.5     |
| H(90A)-C(90)-H(90C)  | 109.5     |
| H(90B)-C(90)-H(90C)  | 109.5     |
| C(88')-C(90')-H(90D) | 109.5     |
| C(88')-C(90')-H(90E) | 109.5     |
| H(90D)-C(90')-H(90E) | 109.5     |
| C(88')-C(90')-H(90F) | 109.5     |

|                      |           |
|----------------------|-----------|
| H(90D)-C(90')-H(90F) | 109.5     |
| H(90E)-C(90')-H(90F) | 109.5     |
| C(88)-C(91)-H(91A)   | 109.5     |
| C(88)-C(91)-H(91B)   | 109.5     |
| H(91A)-C(91)-H(91B)  | 109.5     |
| C(88)-C(91)-H(91C)   | 109.5     |
| H(91A)-C(91)-H(91C)  | 109.5     |
| H(91B)-C(91)-H(91C)  | 109.5     |
| C(88')-C(91')-H(91D) | 109.5     |
| C(88')-C(91')-H(91E) | 109.5     |
| H(91D)-C(91')-H(91E) | 109.5     |
| C(88')-C(91')-H(91F) | 109.5     |
| H(91D)-C(91')-H(91F) | 109.5     |
| H(91E)-C(91')-H(91F) | 109.5     |
| C(94)-C(92)-C(93)    | 110.1(18) |
| C(94)-C(92)-C(95)    | 112.7(15) |
| C(93)-C(92)-C(95)    | 110.8(18) |
| C(94)-C(92)-C(87)    | 102.4(12) |
| C(93)-C(92)-C(87)    | 112.6(15) |
| C(95)-C(92)-C(87)    | 108.0(13) |
| C(93')-C(92')-C(94') | 99(3)     |
| C(93')-C(92')-C(95') | 99(3)     |
| C(94')-C(92')-C(95') | 103(3)    |
| C(93')-C(92')-C(87)  | 119(3)    |
| C(94')-C(92')-C(87)  | 121(3)    |
| C(95')-C(92')-C(87)  | 113(2)    |
| C(92)-C(93)-H(93A)   | 109.5     |
| C(92)-C(93)-H(93B)   | 109.5     |
| H(93A)-C(93)-H(93B)  | 109.5     |
| C(92)-C(93)-H(93C)   | 109.5     |
| H(93A)-C(93)-H(93C)  | 109.5     |
| H(93B)-C(93)-H(93C)  | 109.5     |
| C(92')-C(93')-H(93D) | 109.5     |
| C(92')-C(93')-H(93E) | 109.5     |
| H(93D)-C(93')-H(93E) | 109.5     |
| C(92')-C(93')-H(93F) | 109.5     |
| H(93D)-C(93')-H(93F) | 109.5     |
| H(93E)-C(93')-H(93F) | 109.5     |
| C(92)-C(94)-H(94A)   | 109.5     |
| C(92)-C(94)-H(94B)   | 109.5     |
| H(94A)-C(94)-H(94B)  | 109.5     |
| C(92)-C(94)-H(94C)   | 109.5     |
| H(94A)-C(94)-H(94C)  | 109.5     |
| H(94B)-C(94)-H(94C)  | 109.5     |
| C(92')-C(94')-H(94D) | 109.5     |
| C(92')-C(94')-H(94E) | 109.5     |
| H(94D)-C(94')-H(94E) | 109.5     |
| C(92')-C(94')-H(94F) | 109.5     |
| H(94D)-C(94')-H(94F) | 109.5     |
| H(94E)-C(94')-H(94F) | 109.5     |
| C(92)-C(95)-H(95A)   | 109.5     |
| C(92)-C(95)-H(95B)   | 109.5     |
| H(95A)-C(95)-H(95B)  | 109.5     |
| C(92)-C(95)-H(95C)   | 109.5     |
| H(95A)-C(95)-H(95C)  | 109.5     |
| H(95B)-C(95)-H(95C)  | 109.5     |
| C(92')-C(95')-H(95D) | 109.5     |
| C(92')-C(95')-H(95E) | 109.5     |
| H(95D)-C(95')-H(95E) | 109.5     |
| C(92')-C(95')-H(95F) | 109.5     |
| H(95D)-C(95')-H(95F) | 109.5     |
| H(95E)-C(95')-H(95F) | 109.5     |

|                      |           |
|----------------------|-----------|
| O(11)-C(96)-C(97)    | 123.2(9)  |
| O(11)-C(96)-C(99)    | 116.0(9)  |
| C(97)-C(96)-C(99)    | 120.8(8)  |
| C(98)-C(97)-C(96)    | 125.5(9)  |
| C(98)-C(97)-H(97)    | 117.3     |
| C(96)-C(97)-H(97)    | 117.3     |
| O(12)-C(98)-C(97)    | 123.9(9)  |
| O(12)-C(98)-C(103)   | 115.7(9)  |
| C(97)-C(98)-C(103)   | 120.4(9)  |
| C(100)-C(99)-C(102)  | 107.7(11) |
| C(100)-C(99)-C(101)  | 102.1(16) |
| C(102)-C(99)-C(101)  | 120.0(16) |
| C(100)-C(99)-C(1A)   | 128(3)    |
| C(102)-C(99)-C(1A)   | 94(3)     |
| C(100)-C(99)-C(96)   | 108.3(9)  |
| C(102)-C(99)-C(96)   | 105.3(9)  |
| C(101)-C(99)-C(96)   | 112.9(11) |
| C(1A)-C(99)-C(96)    | 110.1(18) |
| C(99)-C(100)-H(10D)  | 109.5     |
| C(99)-C(100)-H(10E)  | 109.5     |
| H(10D)-C(100)-H(10E) | 109.5     |
| C(99)-C(100)-H(10F)  | 109.5     |
| H(10D)-C(100)-H(10F) | 109.5     |
| H(10E)-C(100)-H(10F) | 109.5     |
| C(99)-C(101)-H(10G)  | 109.5     |
| C(99)-C(101)-H(10H)  | 109.5     |
| H(10G)-C(101)-H(10H) | 109.5     |
| C(99)-C(101)-H(10I)  | 109.5     |
| H(10G)-C(101)-H(10I) | 109.5     |
| H(10H)-C(101)-H(10I) | 109.5     |
| C(99)-C(102)-H(10J)  | 109.5     |
| C(99)-C(102)-H(10K)  | 109.5     |
| H(10J)-C(102)-H(10K) | 109.5     |
| C(99)-C(102)-H(10L)  | 109.5     |
| H(10J)-C(102)-H(10L) | 109.5     |
| H(10K)-C(102)-H(10L) | 109.5     |
| C(106)-C(103)-C(105) | 112.2(15) |
| C(1B)-C(103)-C(1D)   | 106(2)    |
| C(106)-C(103)-C(98)  | 110.0(10) |
| C(105)-C(103)-C(98)  | 102.8(12) |
| C(1B)-C(103)-C(98)   | 112.2(16) |
| C(1D)-C(103)-C(98)   | 114.2(13) |
| C(106)-C(103)-C(104) | 112.1(18) |
| C(105)-C(103)-C(104) | 108.7(17) |
| C(98)-C(103)-C(104)  | 110.6(11) |
| C(1B)-C(103)-C(1C)   | 106(2)    |
| C(1D)-C(103)-C(1C)   | 107(2)    |
| C(98)-C(103)-C(1C)   | 111.5(14) |
| C(103)-C(104)-H(10M) | 109.5     |
| C(103)-C(104)-H(10N) | 109.5     |
| H(10M)-C(104)-H(10N) | 109.5     |
| C(103)-C(104)-H(10O) | 109.5     |
| H(10M)-C(104)-H(10O) | 109.5     |
| H(10N)-C(104)-H(10O) | 109.5     |
| C(103)-C(105)-H(10P) | 109.5     |
| C(103)-C(105)-H(10Q) | 109.5     |
| H(10P)-C(105)-H(10Q) | 109.5     |
| C(103)-C(105)-H(10R) | 109.5     |
| H(10P)-C(105)-H(10R) | 109.5     |
| H(10Q)-C(105)-H(10R) | 109.5     |
| C(103)-C(106)-H(10S) | 109.5     |
| C(103)-C(106)-H(10T) | 109.5     |

|                      |            |
|----------------------|------------|
| H(10S)-C(106)-H(10T) | 109.5      |
| C(103)-C(106)-H(10U) | 109.5      |
| H(10S)-C(106)-H(10U) | 109.5      |
| H(10T)-C(106)-H(10U) | 109.5      |
| O(15)-Cs(1)-O(13)    | 106.0(2)   |
| O(15)-Cs(1)-O(18)    | 133.5(2)   |
| O(13)-Cs(1)-O(18)    | 112.6(2)   |
| O(15)-Cs(1)-O(16)    | 60.9(2)    |
| O(13)-Cs(1)-O(16)    | 150.0(2)   |
| O(18)-Cs(1)-O(16)    | 93.27(19)  |
| O(15)-Cs(1)-O(14)    | 131.7(2)   |
| O(13)-Cs(1)-O(14)    | 60.6(2)    |
| O(18)-Cs(1)-O(14)    | 90.67(19)  |
| O(16)-Cs(1)-O(14)    | 106.18(19) |
| O(15)-Cs(1)-O(17)    | 95.0(3)    |
| O(13)-Cs(1)-O(17)    | 91.1(2)    |
| O(18)-Cs(1)-O(17)    | 60.2(2)    |
| O(16)-Cs(1)-O(17)    | 115.8(2)   |
| O(14)-Cs(1)-O(17)    | 128.9(2)   |
| O(15)-Cs(1)-N(9)     | 60.8(3)    |
| O(13)-Cs(1)-N(9)     | 60.6(2)    |
| O(18)-Cs(1)-N(9)     | 118.9(3)   |
| O(16)-Cs(1)-N(9)     | 120.5(2)   |
| O(14)-Cs(1)-N(9)     | 120.5(2)   |
| O(17)-Cs(1)-N(9)     | 59.5(3)    |
| O(15)-Cs(1)-N(10)    | 119.9(2)   |
| O(13)-Cs(1)-N(10)    | 120.3(2)   |
| O(18)-Cs(1)-N(10)    | 59.2(2)    |
| O(16)-Cs(1)-N(10)    | 59.8(2)    |
| O(14)-Cs(1)-N(10)    | 60.6(2)    |
| O(17)-Cs(1)-N(10)    | 118.5(2)   |
| N(9)-Cs(1)-N(10)     | 178.0(3)   |
| C(109)-O(13)-C(108)  | 111.7(9)   |
| C(109)-O(13)-Cs(1)   | 110.3(6)   |
| C(108)-O(13)-Cs(1)   | 105.6(6)   |
| C(111)-O(14)-C(110)  | 113.6(9)   |
| C(111)-O(14)-Cs(1)   | 111.1(5)   |
| C(110)-O(14)-Cs(1)   | 105.2(5)   |
| C(114)-O(15)-C(115)  | 112.3(9)   |
| C(114)-O(15)-Cs(1)   | 112.7(8)   |
| C(115)-O(15)-Cs(1)   | 108.1(6)   |
| C(117)-O(16)-C(116)  | 113.3(8)   |
| C(117)-O(16)-Cs(1)   | 104.6(5)   |
| C(116)-O(16)-Cs(1)   | 108.6(6)   |
| C(121)-O(17)-C(120)  | 113.0(12)  |
| C(121)-O(17)-Cs(1)   | 108.2(6)   |
| C(120)-O(17)-Cs(1)   | 112.8(7)   |
| C(123)-O(18)-C(122)  | 110.8(8)   |
| C(123)-O(18)-Cs(1)   | 109.3(6)   |
| C(122)-O(18)-Cs(1)   | 108.7(6)   |
| C(113)-N(9)-C(119)   | 112.3(12)  |
| C(113)-N(9)-C(107)   | 110.9(11)  |
| C(119)-N(9)-C(107)   | 109.1(11)  |
| C(113)-N(9)-Cs(1)    | 105.2(7)   |
| C(119)-N(9)-Cs(1)    | 111.1(7)   |
| C(107)-N(9)-Cs(1)    | 108.1(7)   |
| C(124)-N(10)-C(118)  | 112.1(9)   |
| C(124)-N(10)-C(112)  | 110.2(8)   |
| C(118)-N(10)-C(112)  | 111.6(9)   |
| C(124)-N(10)-Cs(1)   | 109.9(6)   |
| C(118)-N(10)-Cs(1)   | 107.2(6)   |
| C(112)-N(10)-Cs(1)   | 105.6(5)   |

|                      |           |
|----------------------|-----------|
| N(9)-C(107)-C(108)   | 113.1(10) |
| N(9)-C(107)-Cs(1)    | 50.3(5)   |
| C(108)-C(107)-Cs(1)  | 71.0(6)   |
| N(9)-C(107)-H(10V)   | 109.0     |
| C(108)-C(107)-H(10V) | 109.0     |
| Cs(1)-C(107)-H(10V)  | 151.2     |
| N(9)-C(107)-H(10W)   | 109.0     |
| C(108)-C(107)-H(10W) | 109.0     |
| Cs(1)-C(107)-H(10W)  | 98.9      |
| H(10V)-C(107)-H(10W) | 107.8     |
| O(13)-C(108)-C(107)  | 106.5(10) |
| O(13)-C(108)-Cs(1)   | 51.4(4)   |
| C(107)-C(108)-Cs(1)  | 85.5(6)   |
| O(13)-C(108)-H(10X)  | 110.4     |
| C(107)-C(108)-H(10X) | 110.4     |
| Cs(1)-C(108)-H(10X)  | 159.9     |
| O(13)-C(108)-H(10Y)  | 110.4     |
| C(107)-C(108)-H(10Y) | 110.4     |
| Cs(1)-C(108)-H(10Y)  | 75.2      |
| H(10X)-C(108)-H(10Y) | 108.6     |
| O(13)-C(109)-C(110)  | 108.2(10) |
| O(13)-C(109)-Cs(1)   | 48.6(4)   |
| C(110)-C(109)-Cs(1)  | 76.6(6)   |
| O(13)-C(109)-H       | 110.1     |
| C(110)-C(109)-H      | 110.1     |
| Cs(1)-C(109)-H       | 88.1      |
| O(13)-C(109)-H(10Z)  | 110.1     |
| C(110)-C(109)-H(10Z) | 110.1     |
| Cs(1)-C(109)-H(10Z)  | 157.6     |
| H-C(109)-H(10Z)      | 108.4     |
| O(14)-C(110)-C(109)  | 109.5(10) |
| O(14)-C(110)-Cs(1)   | 52.3(4)   |
| C(109)-C(110)-Cs(1)  | 80.0(6)   |
| O(14)-C(110)-H(11D)  | 109.8     |
| C(109)-C(110)-H(11D) | 109.8     |
| Cs(1)-C(110)-H(11D)  | 81.2      |
| O(14)-C(110)-H(11E)  | 109.8     |
| C(109)-C(110)-H(11E) | 109.8     |
| Cs(1)-C(110)-H(11E)  | 162.1     |
| H(11D)-C(110)-H(11E) | 108.2     |
| O(14)-C(111)-C(112)  | 108.9(9)  |
| O(14)-C(111)-Cs(1)   | 48.0(4)   |
| C(112)-C(111)-Cs(1)  | 80.8(5)   |
| O(14)-C(111)-H(11F)  | 109.9     |
| C(112)-C(111)-H(11F) | 109.9     |
| Cs(1)-C(111)-H(11F)  | 157.9     |
| O(14)-C(111)-H(11G)  | 109.9     |
| C(112)-C(111)-H(11G) | 109.9     |
| Cs(1)-C(111)-H(11G)  | 84.7      |
| H(11F)-C(111)-H(11G) | 108.3     |
| N(10)-C(112)-C(111)  | 115.0(8)  |
| N(10)-C(112)-Cs(1)   | 52.3(4)   |
| C(111)-C(112)-Cs(1)  | 76.0(5)   |
| N(10)-C(112)-H(11H)  | 108.5     |
| C(111)-C(112)-H(11H) | 108.5     |
| Cs(1)-C(112)-H(11H)  | 157.9     |
| N(10)-C(112)-H(11I)  | 108.5     |
| C(111)-C(112)-H(11I) | 108.5     |
| Cs(1)-C(112)-H(11I)  | 90.7      |
| H(11H)-C(112)-H(11I) | 107.5     |
| N(9)-C(113)-C(114)   | 115.7(12) |
| N(9)-C(113)-Cs(1)    | 53.1(6)   |

|                      |           |
|----------------------|-----------|
| C(114)-C(113)-Cs(1)  | 77.1(6)   |
| N(9)-C(113)-H(11J)   | 108.4     |
| C(114)-C(113)-H(11J) | 108.4     |
| Cs(1)-C(113)-H(11J)  | 159.4     |
| N(9)-C(113)-H(11K)   | 108.4     |
| C(114)-C(113)-H(11K) | 108.4     |
| Cs(1)-C(113)-H(11K)  | 88.9      |
| H(11J)-C(113)-H(11K) | 107.4     |
| O(15)-C(114)-C(113)  | 110.6(11) |
| O(15)-C(114)-Cs(1)   | 46.8(5)   |
| C(113)-C(114)-Cs(1)  | 79.4(6)   |
| O(15)-C(114)-H(11L)  | 109.5     |
| C(113)-C(114)-H(11L) | 109.5     |
| Cs(1)-C(114)-H(11L)  | 155.5     |
| O(15)-C(114)-H(11M)  | 109.5     |
| C(113)-C(114)-H(11M) | 109.5     |
| Cs(1)-C(114)-H(11M)  | 89.2      |
| H(11L)-C(114)-H(11M) | 108.1     |
| O(15)-C(115)-C(116)  | 109.0(9)  |
| O(15)-C(115)-Cs(1)   | 50.0(4)   |
| C(116)-C(115)-Cs(1)  | 80.9(6)   |
| O(15)-C(115)-H(11N)  | 109.9     |
| C(116)-C(115)-H(11N) | 109.9     |
| Cs(1)-C(115)-H(11N)  | 82.4      |
| O(15)-C(115)-H(11O)  | 109.9     |
| C(116)-C(115)-H(11O) | 109.9     |
| Cs(1)-C(115)-H(11O)  | 159.9     |
| H(11N)-C(115)-H(11O) | 108.3     |
| O(16)-C(116)-C(115)  | 110.0(8)  |
| O(16)-C(116)-Cs(1)   | 49.7(4)   |
| C(115)-C(116)-Cs(1)  | 75.5(5)   |
| O(16)-C(116)-H(11P)  | 109.7     |
| C(115)-C(116)-H(11P) | 109.7     |
| Cs(1)-C(116)-H(11P)  | 89.7      |
| O(16)-C(116)-H(11Q)  | 109.7     |
| C(115)-C(116)-H(11Q) | 109.7     |
| Cs(1)-C(116)-H(11Q)  | 157.5     |
| H(11P)-C(116)-H(11Q) | 108.2     |
| O(16)-C(117)-C(118)  | 112.6(10) |
| O(16)-C(117)-Cs(1)   | 53.5(4)   |
| C(118)-C(117)-Cs(1)  | 87.7(5)   |
| O(16)-C(117)-H(11R)  | 109.1     |
| C(118)-C(117)-H(11R) | 109.1     |
| Cs(1)-C(117)-H(11R)  | 160.5     |
| O(16)-C(117)-H(11S)  | 109.1     |
| C(118)-C(117)-H(11S) | 109.1     |
| Cs(1)-C(117)-H(11S)  | 74.5      |
| H(11R)-C(117)-H(11S) | 107.8     |
| N(10)-C(118)-C(117)  | 116.7(9)  |
| N(10)-C(118)-Cs(1)   | 51.4(4)   |
| C(117)-C(118)-Cs(1)  | 69.6(5)   |
| N(10)-C(118)-H(11T)  | 108.1     |
| C(117)-C(118)-H(11T) | 108.1     |
| Cs(1)-C(118)-H(11T)  | 145.5     |
| N(10)-C(118)-H(11U)  | 108.1     |
| C(117)-C(118)-H(11U) | 108.1     |
| Cs(1)-C(118)-H(11U)  | 105.8     |
| H(11T)-C(118)-H(11U) | 107.3     |
| N(9)-C(119)-C(120)   | 114.0(11) |
| N(9)-C(119)-Cs(1)    | 48.2(5)   |
| C(120)-C(119)-Cs(1)  | 76.1(6)   |
| N(9)-C(119)-H(11V)   | 108.8     |

|                      |           |
|----------------------|-----------|
| C(120)-C(119)-H(11V) | 108.8     |
| Cs(1)-C(119)-H(11V)  | 152.7     |
| N(9)-C(119)-H(11W)   | 108.8     |
| C(120)-C(119)-H(11W) | 108.8     |
| Cs(1)-C(119)-H(11W)  | 95.4      |
| H(11V)-C(119)-H(11W) | 107.7     |
| O(17)-C(120)-C(119)  | 109.5(13) |
| O(17)-C(120)-Cs(1)   | 46.4(5)   |
| C(119)-C(120)-Cs(1)  | 81.0(7)   |
| O(17)-C(120)-H(12A)  | 109.8     |
| C(119)-C(120)-H(12A) | 109.8     |
| Cs(1)-C(120)-H(12A)  | 155.9     |
| O(17)-C(120)-H(12B)  | 109.8     |
| C(119)-C(120)-H(12B) | 109.8     |
| Cs(1)-C(120)-H(12B)  | 86.9      |
| H(12A)-C(120)-H(12B) | 108.2     |
| O(17)-C(121)-C(122)  | 107.7(10) |
| O(17)-C(121)-Cs(1)   | 50.0(5)   |
| C(122)-C(121)-Cs(1)  | 78.0(7)   |
| O(17)-C(121)-H(12C)  | 110.2     |
| C(122)-C(121)-H(12C) | 110.2     |
| Cs(1)-C(121)-H(12C)  | 84.5      |
| O(17)-C(121)-H(12D)  | 110.2     |
| C(122)-C(121)-H(12D) | 110.2     |
| Cs(1)-C(121)-H(12D)  | 159.9     |
| H(12C)-C(121)-H(12D) | 108.5     |
| O(18)-C(122)-C(121)  | 110.2(10) |
| O(18)-C(122)-Cs(1)   | 49.5(5)   |
| C(121)-C(122)-Cs(1)  | 79.1(7)   |
| O(18)-C(122)-H(12E)  | 109.6     |
| C(121)-C(122)-H(12E) | 109.6     |
| Cs(1)-C(122)-H(12E)  | 85.9      |
| O(18)-C(122)-H(12F)  | 109.6     |
| C(121)-C(122)-H(12F) | 109.6     |
| Cs(1)-C(122)-H(12F)  | 158.7     |
| H(12E)-C(122)-H(12F) | 108.1     |
| O(18)-C(123)-C(124)  | 108.8(9)  |
| O(18)-C(123)-Cs(1)   | 49.4(5)   |
| C(124)-C(123)-Cs(1)  | 84.5(6)   |
| O(18)-C(123)-H(12G)  | 109.9     |
| C(124)-C(123)-H(12G) | 109.9     |
| Cs(1)-C(123)-H(12G)  | 158.8     |
| O(18)-C(123)-H(12H)  | 109.9     |
| C(124)-C(123)-H(12H) | 109.9     |
| Cs(1)-C(123)-H(12H)  | 79.6      |
| H(12G)-C(123)-H(12H) | 108.3     |
| N(10)-C(124)-C(123)  | 113.9(9)  |
| N(10)-C(124)-Cs(1)   | 49.6(5)   |
| C(123)-C(124)-Cs(1)  | 72.0(5)   |
| N(10)-C(124)-H(12I)  | 108.8     |
| C(123)-C(124)-H(12I) | 108.8     |
| Cs(1)-C(124)-H(12I)  | 150.3     |
| N(10)-C(124)-H(12J)  | 108.8     |
| C(123)-C(124)-H(12J) | 108.8     |
| Cs(1)-C(124)-H(12J)  | 99.6      |
| H(12I)-C(124)-H(12J) | 107.7     |

---

Symmetry transformations used to generate equivalent atoms:

#1  $x-1, -y+1/2, z-1/2$  #2  $x, -y+1/2, z+1/2$  #3  $x+1, -y+1/2, z+1/2$

#4  $x, -y+1/2, z-1/2$

**Table S6.** Bond lengths [E] and angles [°] for **3**.

---

|               |           |
|---------------|-----------|
| Tb(1)-O(1)    | 2.311(3)  |
| Tb(1)-O(4)    | 2.313(4)  |
| Tb(1)-O(5)    | 2.327(3)  |
| Tb(1)-O(3)    | 2.339(4)  |
| Tb(1)-O(6)    | 2.349(4)  |
| Tb(1)-O(2)    | 2.349(3)  |
| Tb(1)-N(1)    | 2.604(4)  |
| Tb(1)-N(6)#1  | 2.637(4)  |
| Tb(2)-O(8)    | 2.299(4)  |
| Tb(2)-O(10)   | 2.309(4)  |
| Tb(2)-O(11)   | 2.323(3)  |
| Tb(2)-O(9)    | 2.340(4)  |
| Tb(2)-O(12)   | 2.341(3)  |
| Tb(2)-O(7)    | 2.373(4)  |
| Tb(2)-N(8)#2  | 2.580(4)  |
| Tb(2)-N(7)    | 2.598(4)  |
| Cs(1)-O(18')  | 2.832(10) |
| Cs(1)-O(13)   | 2.932(13) |
| Cs(1)-O(17)   | 3.020(8)  |
| Cs(1)-O(18)   | 3.042(11) |
| Cs(1)-O(13')  | 3.06(2)   |
| Cs(1)-O(14)   | 3.102(11) |
| Cs(1)-O(14')  | 3.200(14) |
| Cs(1)-N(5)    | 3.207(4)  |
| Cs(1)-O(17')  | 3.227(12) |
| Cs(1)-N(10')  | 3.23(2)   |
| Cs(1)-C(40)   | 3.287(5)  |
| Cs(1)-N(9)    | 3.309(16) |
| Cs(2)-O(23)   | 2.991(7)  |
| Cs(2)-O(21)   | 2.993(10) |
| Cs(2)-O(24)   | 3.020(6)  |
| Cs(2)-O(22)   | 3.147(10) |
| Cs(2)-N(11)   | 3.218(6)  |
| Cs(2)-N(12)   | 3.252(8)  |
| Cs(2)-N(3)    | 3.293(5)  |
| Cs(2)-N(4)    | 3.386(4)  |
| Cs(2)-C(53)   | 3.527(5)  |
| Cs(2)-C(142)  | 3.551(10) |
| Cs(2)-C(131)  | 3.60(2)   |
| Cs(2)-C(136)  | 3.665(8)  |
| Cs(2')-O(23') | 2.99(2)   |
| Cs(2')-O(24') | 3.03(3)   |
| Cs(2')-O(22') | 3.032(19) |
| Cs(2')-O(21') | 3.13(4)   |
| Cs(2')-N(3)   | 3.184(5)  |
| Cs(2')-N(11)  | 3.256(6)  |
| Cs(2')-N(12') | 3.285(19) |
| Cs(2')-N(4)   | 3.360(5)  |
| Cs(2')-C(23A) | 3.60(2)   |
| Cs(2')-C(141) | 3.604(7)  |
| Cs(2')-C(24A) | 3.68(6)   |
| Cs(2')-C(53)  | 3.706(6)  |
| O(1)-C(1)     | 1.262(6)  |
| O(2)-C(3)     | 1.276(6)  |
| O(3)-C(12)    | 1.270(8)  |
| O(4)-C(14)    | 1.261(7)  |
| O(5)-C(23)    | 1.254(7)  |
| O(6)-C(25)    | 1.279(6)  |
| O(7)-C(74)    | 1.267(7)  |
| O(8)-C(76)    | 1.264(7)  |

|               |           |
|---------------|-----------|
| O(9)-C(85)    | 1.259(7)  |
| O(10)-C(87)   | 1.266(7)  |
| O(11)-C(96)   | 1.267(7)  |
| O(12)-C(98)   | 1.275(7)  |
| O(13)-C(108)  | 1.39(2)   |
| O(13)-C(109)  | 1.50(3)   |
| O(13')-C(2A)  | 1.29(4)   |
| O(13')-C(3A)  | 1.50(4)   |
| O(14)-C(110)  | 1.37(2)   |
| O(14)-C(111)  | 1.56(2)   |
| O(14')-C(4A)  | 1.32(3)   |
| O(14')-C(5A)  | 1.63(3)   |
| O(15)-C(114)  | 1.398(10) |
| O(15)-C(115)  | 1.435(9)  |
| O(16)-C(116)  | 1.404(8)  |
| O(16)-C(117)  | 1.416(8)  |
| O(17)-C(121)  | 1.361(19) |
| O(17)-C(120)  | 1.47(3)   |
| O(17')-C(11A) | 1.37(3)   |
| O(17')-C(10A) | 1.46(2)   |
| O(18)-C(123)  | 1.38(2)   |
| O(18)-C(122)  | 1.46(3)   |
| O(18')-C(13A) | 1.36(4)   |
| O(18')-C(12A) | 1.48(2)   |
| O(19)-C(127)  | 1.343(12) |
| O(19)-C(126)  | 1.400(14) |
| O(19')-C(16A) | 1.394(13) |
| O(19')-C(127) | 1.521(12) |
| O(20)-C(129)  | 1.397(9)  |
| O(20)-C(128)  | 1.436(10) |
| O(20')-C(129) | 1.36(2)   |
| O(20')-C(17A) | 1.45(4)   |
| O(21)-C(133)  | 1.369(18) |
| O(21)-C(132)  | 1.451(18) |
| O(21')-C(20A) | 1.41(6)   |
| O(21')-C(21A) | 1.44(6)   |
| O(22)-C(135)  | 1.385(14) |
| O(22)-C(134)  | 1.435(14) |
| O(22')-C(22A) | 1.55(2)   |
| O(22')-C(136) | 1.563(17) |
| O(23)-C(138)  | 1.398(17) |
| O(23)-C(139)  | 1.441(16) |
| O(23')-C(25A) | 1.41(4)   |
| O(23')-C(26A) | 1.44(4)   |
| O(24)-C(140)  | 1.446(16) |
| O(24)-C(141)  | 1.446(10) |
| O(24')-C(28A) | 1.37(5)   |
| O(24')-C(27A) | 1.52(6)   |
| N(1)-C(34)    | 1.329(7)  |
| N(1)-C(38)    | 1.347(7)  |
| N(2)-C(70)    | 1.383(7)  |
| N(2)-C(73)    | 1.394(6)  |
| N(2)-H(2)     | 0.8800    |
| N(3)-C(60)    | 1.378(7)  |
| N(3)-C(63)    | 1.385(7)  |
| N(3)-H(3)     | 0.8800    |
| N(4)-C(50)    | 1.393(6)  |
| N(4)-C(53)    | 1.399(6)  |
| N(4)-H(4)     | 0.8800    |
| N(5)-C(40)    | 1.372(7)  |
| N(5)-C(43)    | 1.387(6)  |
| N(5)-H(5)     | 0.8800    |

|               |           |
|---------------|-----------|
| N(6)-C(49)    | 1.336(6)  |
| N(6)-C(47)    | 1.354(6)  |
| N(7)-C(57)    | 1.335(7)  |
| N(7)-C(59)    | 1.354(7)  |
| N(8)-C(67)    | 1.312(7)  |
| N(8)-C(69)    | 1.348(7)  |
| N(9)-C(113)   | 1.44(3)   |
| N(9)-C(119)   | 1.45(2)   |
| N(9)-C(107)   | 1.54(3)   |
| N(9')-C(9A)   | 1.40(4)   |
| N(9')-C(1A)   | 1.48(3)   |
| N(9')-C(7A)   | 1.56(4)   |
| N(10)-C(112)  | 1.43(2)   |
| N(10)-C(118)  | 1.48(3)   |
| N(10)-C(124)  | 1.55(4)   |
| N(10')-C(6A)  | 1.42(3)   |
| N(10')-C(8A)  | 1.48(3)   |
| N(10')-C(14A) | 1.49(3)   |
| N(11)-C(24A)  | 1.25(6)   |
| N(11)-C(125)  | 1.444(18) |
| N(11)-C(131)  | 1.453(12) |
| N(11)-C(19A)  | 1.460(19) |
| N(11)-C(15A)  | 1.51(6)   |
| N(11)-C(137)  | 1.572(17) |
| N(12)-C(142)  | 1.435(12) |
| N(12)-C(130)  | 1.478(11) |
| N(12)-C(136)  | 1.483(11) |
| N(12')-C(18A) | 1.459(19) |
| N(12')-C(23A) | 1.463(19) |
| N(12')-C(141) | 1.473(17) |
| C(1)-C(2)     | 1.402(8)  |
| C(1)-C(4)     | 1.542(7)  |
| C(1A)-C(2A)   | 1.46(5)   |
| C(1A)-H(1AA)  | 0.9900    |
| C(1A)-H(1AB)  | 0.9900    |
| C(2)-C(3)     | 1.380(8)  |
| C(2)-H(2A)    | 0.9500    |
| C(2A)-H(2AA)  | 0.9900    |
| C(2A)-H(2AB)  | 0.9900    |
| C(3)-C(8)     | 1.552(7)  |
| C(3A)-C(4A)   | 1.548(19) |
| C(3A)-H(3AA)  | 0.9900    |
| C(3A)-H(3AB)  | 0.9900    |
| C(4)-C(7)     | 1.527(8)  |
| C(4)-C(5)     | 1.528(9)  |
| C(4)-C(6)     | 1.549(9)  |
| C(4A)-H(4AA)  | 0.9900    |
| C(4A)-H(4AB)  | 0.9900    |
| C(5)-H(5A)    | 0.9800    |
| C(5)-H(5B)    | 0.9800    |
| C(5)-H(5C)    | 0.9800    |
| C(5A)-C(6A)   | 1.27(3)   |
| C(5A)-H(5AA)  | 0.9900    |
| C(5A)-H(5AB)  | 0.9900    |
| C(6)-H(6A)    | 0.9800    |
| C(6)-H(6B)    | 0.9800    |
| C(6)-H(6C)    | 0.9800    |
| C(6A)-H(6AA)  | 0.9900    |
| C(6A)-H(6AB)  | 0.9900    |
| C(7)-H(7A)    | 0.9800    |
| C(7)-H(7B)    | 0.9800    |
| C(7)-H(7C)    | 0.9800    |

|               |           |
|---------------|-----------|
| C(7A)-C(114)  | 1.573(19) |
| C(7A)-H(7AA)  | 0.9900    |
| C(7A)-H(7AB)  | 0.9900    |
| C(8)-C(11)    | 1.526(8)  |
| C(8)-C(10)    | 1.529(9)  |
| C(8)-C(9)     | 1.536(8)  |
| C(8A)-C(117)  | 1.515(15) |
| C(8A)-H(8AA)  | 0.9900    |
| C(8A)-H(8AB)  | 0.9900    |
| C(9)-H(9A)    | 0.9800    |
| C(9)-H(9B)    | 0.9800    |
| C(9)-H(9C)    | 0.9800    |
| C(9A)-C(10A)  | 1.55(4)   |
| C(9A)-H(9AA)  | 0.9900    |
| C(9A)-H(9AB)  | 0.9900    |
| C(10)-H(10A)  | 0.9800    |
| C(10)-H(10B)  | 0.9800    |
| C(10)-H(10C)  | 0.9800    |
| C(10A)-H(10D) | 0.9900    |
| C(10A)-H(10E) | 0.9900    |
| C(11)-H(11A)  | 0.9800    |
| C(11)-H(11B)  | 0.9800    |
| C(11)-H(11C)  | 0.9800    |
| C(11A)-C(12A) | 1.52(3)   |
| C(11A)-H(11D) | 0.9900    |
| C(11A)-H(11E) | 0.9900    |
| C(12)-C(13)   | 1.384(10) |
| C(12)-C(15')  | 1.548(13) |
| C(12)-C(15)   | 1.587(13) |
| C(12A)-H(12A) | 0.9900    |
| C(12A)-H(12B) | 0.9900    |
| C(13)-C(14)   | 1.405(9)  |
| C(13)-H(13)   | 0.9500    |
| C(13A)-C(14A) | 1.52(3)   |
| C(13A)-H(13A) | 0.9900    |
| C(13A)-H(13B) | 0.9900    |
| C(14)-C(19)   | 1.540(8)  |
| C(14A)-H(14A) | 0.9900    |
| C(14A)-H(14B) | 0.9900    |
| C(15)-C(18)   | 1.514(14) |
| C(15)-C(16)   | 1.520(13) |
| C(15)-C(17)   | 1.522(13) |
| C(15')-C(18') | 1.508(13) |
| C(15')-C(16') | 1.528(13) |
| C(15')-C(17') | 1.529(12) |
| C(15A)-C(16A) | 1.576(15) |
| C(15A)-H(15A) | 0.9900    |
| C(15A)-H(15B) | 0.9900    |
| C(16)-H(16A)  | 0.9800    |
| C(16)-H(16B)  | 0.9800    |
| C(16)-H(16C)  | 0.9800    |
| C(16')-H(16D) | 0.9800    |
| C(16')-H(16E) | 0.9800    |
| C(16')-H(16F) | 0.9800    |
| C(16A)-H(16G) | 0.9900    |
| C(16A)-H(16H) | 0.9900    |
| C(17)-H(17A)  | 0.9800    |
| C(17)-H(17B)  | 0.9800    |
| C(17)-H(17C)  | 0.9800    |
| C(17')-H(17D) | 0.9800    |
| C(17')-H(17E) | 0.9800    |
| C(17')-H(17F) | 0.9800    |

|               |           |
|---------------|-----------|
| C(17A)-C(127) | 1.36(2)   |
| C(17A)-H(17G) | 0.9900    |
| C(17A)-H(17H) | 0.9900    |
| C(18)-H(18A)  | 0.9800    |
| C(18)-H(18B)  | 0.9800    |
| C(18)-H(18C)  | 0.9800    |
| C(18')-H(18D) | 0.9800    |
| C(18')-H(18E) | 0.9800    |
| C(18')-H(18F) | 0.9800    |
| C(18A)-C(129) | 1.42(3)   |
| C(18A)-H(18G) | 0.9900    |
| C(18A)-H(18H) | 0.9900    |
| C(19)-C(21)   | 1.521(10) |
| C(19)-C(22)   | 1.546(10) |
| C(19)-C(20)   | 1.551(9)  |
| C(19A)-C(20A) | 1.61(6)   |
| C(19A)-H(19A) | 0.9900    |
| C(19A)-H(19B) | 0.9900    |
| C(20)-H(20A)  | 0.9800    |
| C(20)-H(20B)  | 0.9800    |
| C(20)-H(20C)  | 0.9800    |
| C(20A)-H(20D) | 0.9900    |
| C(20A)-H(20E) | 0.9900    |
| C(21)-H(21A)  | 0.9800    |
| C(21)-H(21B)  | 0.9800    |
| C(21)-H(21C)  | 0.9800    |
| C(21A)-C(22A) | 1.37(6)   |
| C(21A)-H(21D) | 0.9900    |
| C(21A)-H(21E) | 0.9900    |
| C(22)-H(22A)  | 0.9800    |
| C(22)-H(22B)  | 0.9800    |
| C(22)-H(22C)  | 0.9800    |
| C(22A)-H(22D) | 0.9900    |
| C(22A)-H(22E) | 0.9900    |
| C(23)-C(24)   | 1.386(8)  |
| C(23)-C(26)   | 1.547(8)  |
| C(23A)-C(136) | 1.40(3)   |
| C(23A)-H(23A) | 0.9900    |
| C(23A)-H(23B) | 0.9900    |
| C(24)-C(25)   | 1.402(8)  |
| C(24)-H(24)   | 0.9500    |
| C(24A)-C(25A) | 1.43(6)   |
| C(24A)-H(24A) | 0.9900    |
| C(24A)-H(24B) | 0.9900    |
| C(25)-C(30)   | 1.538(8)  |
| C(25A)-H(25A) | 0.9900    |
| C(25A)-H(25B) | 0.9900    |
| C(26)-C(27)   | 1.497(13) |
| C(26)-C(29)   | 1.510(10) |
| C(26)-C(28)   | 1.518(11) |
| C(26A)-C(27A) | 1.45(6)   |
| C(26A)-H(26A) | 0.9900    |
| C(26A)-H(26B) | 0.9900    |
| C(27)-H(27A)  | 0.9800    |
| C(27)-H(27B)  | 0.9800    |
| C(27)-H(27C)  | 0.9800    |
| C(27A)-H(27D) | 0.9900    |
| C(27A)-H(27E) | 0.9900    |
| C(28)-H(28A)  | 0.9800    |
| C(28)-H(28B)  | 0.9800    |
| C(28)-H(28C)  | 0.9800    |
| C(28A)-C(141) | 1.51(3)   |

|               |          |
|---------------|----------|
| C(28A)-H(28D) | 0.9900   |
| C(28A)-H(28E) | 0.9900   |
| C(29)-H(29A)  | 0.9800   |
| C(29)-H(29B)  | 0.9800   |
| C(29)-H(29C)  | 0.9800   |
| C(30)-C(33)   | 1.520(8) |
| C(30)-C(31)   | 1.530(9) |
| C(30)-C(32)   | 1.538(9) |
| C(31)-H(31A)  | 0.9800   |
| C(31)-H(31B)  | 0.9800   |
| C(31)-H(31C)  | 0.9800   |
| C(32)-H(32A)  | 0.9800   |
| C(32)-H(32B)  | 0.9800   |
| C(32)-H(32C)  | 0.9800   |
| C(33)-H(33A)  | 0.9800   |
| C(33)-H(33B)  | 0.9800   |
| C(33)-H(33C)  | 0.9800   |
| C(34)-C(35)   | 1.373(8) |
| C(34)-H(34)   | 0.9500   |
| C(35)-C(36)   | 1.372(8) |
| C(35)-H(35)   | 0.9500   |
| C(36)-C(37)   | 1.386(8) |
| C(36)-C(39)   | 1.499(7) |
| C(37)-C(38)   | 1.386(8) |
| C(37)-H(37)   | 0.9500   |
| C(38)-H(38)   | 0.9500   |
| C(39)-C(73)   | 1.357(7) |
| C(39)-C(40)   | 1.458(7) |
| C(40)-C(41)   | 1.414(7) |
| C(41)-C(42)   | 1.389(8) |
| C(41)-H(41)   | 0.9500   |
| C(42)-C(43)   | 1.410(7) |
| C(42)-H(42)   | 0.9500   |
| C(43)-C(44)   | 1.453(7) |
| C(44)-C(50)   | 1.382(7) |
| C(44)-C(45)   | 1.483(7) |
| C(45)-C(48)   | 1.398(7) |
| C(45)-C(46)   | 1.400(7) |
| C(46)-C(47)   | 1.384(7) |
| C(46)-H(46)   | 0.9500   |
| C(47)-H(47)   | 0.9500   |
| C(48)-C(49)   | 1.397(7) |
| C(48)-H(48)   | 0.9500   |
| C(49)-H(49)   | 0.9500   |
| C(50)-C(51)   | 1.440(7) |
| C(51)-C(52)   | 1.351(7) |
| C(51)-H(51)   | 0.9500   |
| C(52)-C(53)   | 1.431(7) |
| C(52)-H(52)   | 0.9500   |
| C(53)-C(54)   | 1.376(7) |
| C(54)-C(60)   | 1.451(8) |
| C(54)-C(55)   | 1.487(7) |
| C(55)-C(56)   | 1.385(7) |
| C(55)-C(58)   | 1.403(7) |
| C(56)-C(57)   | 1.383(7) |
| C(56)-H(56)   | 0.9500   |
| C(57)-H(57)   | 0.9500   |
| C(58)-C(59)   | 1.383(8) |
| C(58)-H(58)   | 0.9500   |
| C(59)-H(59)   | 0.9500   |
| C(60)-C(61)   | 1.406(7) |
| C(61)-C(62)   | 1.382(8) |

|              |           |
|--------------|-----------|
| C(61)-H(61)  | 0.9500    |
| C(62)-C(63)  | 1.409(7)  |
| C(62)-H(62)  | 0.9500    |
| C(63)-C(64)  | 1.449(8)  |
| C(64)-C(70)  | 1.389(7)  |
| C(64)-C(65)  | 1.492(7)  |
| C(65)-C(68)  | 1.383(8)  |
| C(65)-C(66)  | 1.399(7)  |
| C(66)-C(67)  | 1.384(8)  |
| C(66)-H(66)  | 0.9500    |
| C(67)-H(67)  | 0.9500    |
| C(68)-C(69)  | 1.391(8)  |
| C(68)-H(68)  | 0.9500    |
| C(69)-H(69)  | 0.9500    |
| C(70)-C(71)  | 1.446(8)  |
| C(71)-C(72)  | 1.356(8)  |
| C(71)-H(71)  | 0.9500    |
| C(72)-C(73)  | 1.452(7)  |
| C(72)-H(72)  | 0.9500    |
| C(74)-C(75)  | 1.411(9)  |
| C(74)-C(77)  | 1.534(10) |
| C(75)-C(76)  | 1.404(10) |
| C(75)-H(75)  | 0.9500    |
| C(76)-C(81)  | 1.550(9)  |
| C(77)-C(78)  | 1.519(9)  |
| C(77)-C(80)  | 1.527(10) |
| C(77)-C(79)  | 1.541(11) |
| C(78)-H(78A) | 0.9800    |
| C(78)-H(78B) | 0.9800    |
| C(78)-H(78C) | 0.9800    |
| C(79)-H(79A) | 0.9800    |
| C(79)-H(79B) | 0.9800    |
| C(79)-H(79C) | 0.9800    |
| C(80)-H(80A) | 0.9800    |
| C(80)-H(80B) | 0.9800    |
| C(80)-H(80C) | 0.9800    |
| C(81)-C(82)  | 1.513(10) |
| C(81)-C(83)  | 1.522(9)  |
| C(81)-C(84)  | 1.531(12) |
| C(82)-H(82A) | 0.9800    |
| C(82)-H(82B) | 0.9800    |
| C(82)-H(82C) | 0.9800    |
| C(83)-H(83A) | 0.9800    |
| C(83)-H(83B) | 0.9800    |
| C(83)-H(83C) | 0.9800    |
| C(84)-H(84A) | 0.9800    |
| C(84)-H(84B) | 0.9800    |
| C(84)-H(84C) | 0.9800    |
| C(85)-C(86)  | 1.413(9)  |
| C(85)-C(88)  | 1.542(10) |
| C(86)-C(87)  | 1.392(9)  |
| C(86)-H(86)  | 0.9500    |
| C(87)-C(92)  | 1.549(9)  |
| C(88)-C(90)  | 1.504(11) |
| C(88)-C(91)  | 1.506(10) |
| C(88)-C(89)  | 1.521(12) |
| C(89)-H(89A) | 0.9800    |
| C(89)-H(89B) | 0.9800    |
| C(89)-H(89C) | 0.9800    |
| C(90)-H(90A) | 0.9800    |
| C(90)-H(90B) | 0.9800    |
| C(90)-H(90C) | 0.9800    |

|               |           |
|---------------|-----------|
| C(91)-H(91A)  | 0.9800    |
| C(91)-H(91B)  | 0.9800    |
| C(91)-H(91C)  | 0.9800    |
| C(92)-C(93)   | 1.525(9)  |
| C(92)-C(95)   | 1.529(11) |
| C(92)-C(94)   | 1.543(10) |
| C(93)-H(93A)  | 0.9800    |
| C(93)-H(93B)  | 0.9800    |
| C(93)-H(93C)  | 0.9800    |
| C(94)-H(94A)  | 0.9800    |
| C(94)-H(94B)  | 0.9800    |
| C(94)-H(94C)  | 0.9800    |
| C(95)-H(95A)  | 0.9800    |
| C(95)-H(95B)  | 0.9800    |
| C(95)-H(95C)  | 0.9800    |
| C(96)-C(97)   | 1.413(8)  |
| C(96)-C(99)   | 1.539(8)  |
| C(97)-C(98)   | 1.385(8)  |
| C(97)-H(97)   | 0.9500    |
| C(98)-C(103)  | 1.529(7)  |
| C(99)-C(100)  | 1.502(10) |
| C(99)-C(102)  | 1.524(8)  |
| C(99)-C(101)  | 1.536(10) |
| C(100)-H(10F) | 0.9800    |
| C(100)-H(10G) | 0.9800    |
| C(100)-H(10H) | 0.9800    |
| C(101)-H(10I) | 0.9800    |
| C(101)-H(10J) | 0.9800    |
| C(101)-H(10K) | 0.9800    |
| C(102)-H(10L) | 0.9800    |
| C(102)-H(10M) | 0.9800    |
| C(102)-H(10N) | 0.9800    |
| C(103)-C(106) | 1.512(10) |
| C(103)-C(104) | 1.533(10) |
| C(103)-C(105) | 1.538(10) |
| C(104)-H(10O) | 0.9800    |
| C(104)-H(10P) | 0.9800    |
| C(104)-H(10Q) | 0.9800    |
| C(105)-H(10R) | 0.9800    |
| C(105)-H(10S) | 0.9800    |
| C(105)-H(10T) | 0.9800    |
| C(106)-H(10U) | 0.9800    |
| C(106)-H(10V) | 0.9800    |
| C(106)-H(10W) | 0.9800    |
| C(107)-C(108) | 1.58(3)   |
| C(107)-H(10X) | 0.9900    |
| C(107)-H(10Y) | 0.9900    |
| C(108)-H      | 0.9900    |
| C(108)-H(10Z) | 0.9900    |
| C(109)-C(110) | 1.566(17) |
| C(109)-H(10)  | 0.9900    |
| C(109)-HA     | 0.9900    |
| C(110)-H(11F) | 0.9900    |
| C(110)-H(11G) | 0.9900    |
| C(111)-C(112) | 1.40(3)   |
| C(111)-H(11H) | 0.9900    |
| C(111)-H(11I) | 0.9900    |
| C(112)-H(11J) | 0.9900    |
| C(112)-H(11K) | 0.9900    |
| C(113)-C(114) | 1.546(15) |
| C(113)-H(11L) | 0.9900    |
| C(113)-H(11M) | 0.9900    |

|               |           |
|---------------|-----------|
| C(114)-H(11N) | 0.9900    |
| C(114)-H(11O) | 0.9900    |
| C(114)-H(11P) | 0.9900    |
| C(114)-H(11Q) | 0.9900    |
| C(115)-C(116) | 1.471(11) |
| C(115)-H(11R) | 0.9900    |
| C(115)-H(11S) | 0.9900    |
| C(116)-H(11T) | 0.9900    |
| C(116)-H(11U) | 0.9900    |
| C(117)-C(118) | 1.523(15) |
| C(117)-H(11V) | 0.9900    |
| C(117)-H(11W) | 0.9900    |
| C(117)-H(11X) | 0.9900    |
| C(117)-H(11Y) | 0.9900    |
| C(118)-H(11Z) | 0.9900    |
| C(118)-HB     | 0.9900    |
| C(119)-C(120) | 1.51(3)   |
| C(119)-H(11)  | 0.9900    |
| C(119)-HC     | 0.9900    |
| C(120)-H(12C) | 0.9900    |
| C(120)-H(12D) | 0.9900    |
| C(121)-C(122) | 1.49(3)   |
| C(121)-H(12E) | 0.9900    |
| C(121)-H(12F) | 0.9900    |
| C(122)-H(12G) | 0.9900    |
| C(122)-H(12H) | 0.9900    |
| C(123)-C(124) | 1.49(3)   |
| C(123)-H(12I) | 0.9900    |
| C(123)-H(12J) | 0.9900    |
| C(124)-H(12K) | 0.9900    |
| C(124)-H(12L) | 0.9900    |
| C(125)-C(126) | 1.588(12) |
| C(125)-H(12M) | 0.9900    |
| C(125)-H(12N) | 0.9900    |
| C(126)-H(12O) | 0.9900    |
| C(126)-H(12P) | 0.9900    |
| C(127)-C(128) | 1.432(14) |
| C(127)-H(12S) | 0.9900    |
| C(127)-H(12T) | 0.9900    |
| C(127)-H(12Q) | 0.9900    |
| C(127)-H(12R) | 0.9900    |
| C(128)-H(12U) | 0.9900    |
| C(128)-H(12V) | 0.9900    |
| C(129)-C(130) | 1.485(12) |
| C(129)-H(12W) | 0.9900    |
| C(129)-H(12X) | 0.9900    |
| C(129)-H(12Y) | 0.9900    |
| C(129)-HD     | 0.9900    |
| C(130)-H(13C) | 0.9900    |
| C(130)-H(13D) | 0.9900    |
| C(131)-C(132) | 1.45(2)   |
| C(131)-H(13E) | 0.9900    |
| C(131)-H(13F) | 0.9900    |
| C(132)-H(13G) | 0.9900    |
| C(132)-H(13H) | 0.9900    |
| C(133)-C(134) | 1.475(16) |
| C(133)-H(13I) | 0.9900    |
| C(133)-H(13J) | 0.9900    |
| C(134)-H(13K) | 0.9900    |
| C(134)-H(13L) | 0.9900    |
| C(135)-C(136) | 1.474(12) |
| C(135)-H(13M) | 0.9900    |

|               |           |
|---------------|-----------|
| C(135)-H(13N) | 0.9900    |
| C(136)-H(13O) | 0.9900    |
| C(136)-H(13P) | 0.9900    |
| C(136)-H(13Q) | 0.9900    |
| C(136)-H(13R) | 0.9900    |
| C(137)-C(138) | 1.52(2)   |
| C(137)-H(13S) | 0.9900    |
| C(137)-H(13T) | 0.9900    |
| C(138)-H(13U) | 0.9900    |
| C(138)-H(13V) | 0.9900    |
| C(139)-C(140) | 1.46(3)   |
| C(139)-H(13W) | 0.9900    |
| C(139)-H(13X) | 0.9900    |
| C(140)-H(14C) | 0.9900    |
| C(140)-H(14D) | 0.9900    |
| C(141)-C(142) | 1.514(14) |
| C(141)-H(14E) | 0.9900    |
| C(141)-H(14F) | 0.9900    |
| C(141)-H(14G) | 0.9900    |
| C(141)-H(14H) | 0.9900    |
| C(142)-H(14I) | 0.9900    |
| C(142)-H(14J) | 0.9900    |
| C(1S)-C(2S)   | 1.354(12) |
| C(1S)-C(6S)   | 1.380(12) |
| C(1S)-C(7S)   | 1.521(14) |
| C(2S)-C(3S)   | 1.386(12) |
| C(2S)-H(2S)   | 0.9500    |
| C(3S)-C(4S)   | 1.393(12) |
| C(3S)-H(3S)   | 0.9500    |
| C(4S)-C(5S)   | 1.361(15) |
| C(4S)-H(4S)   | 0.9500    |
| C(5S)-C(6S)   | 1.381(15) |
| C(5S)-H(5S)   | 0.9500    |
| C(6S)-H(6S)   | 0.9500    |
| C(7S)-H(7SA)  | 0.9800    |
| C(7S)-H(7SB)  | 0.9800    |
| C(7S)-H(7SC)  | 0.9800    |
| C(8S)-C(13S)  | 1.358(13) |
| C(8S)-C(13')  | 1.362(11) |
| C(8S)-C(9')   | 1.367(11) |
| C(8S)-C(9S)   | 1.391(13) |
| C(8S)-C(14S)  | 1.439(18) |
| C(8S)-H(8S)   | 0.9500    |
| C(9')-C(10')  | 1.365(11) |
| C(9')-H(9')   | 0.9500    |
| C(9S)-C(10S)  | 1.377(14) |
| C(9S)-H(9S)   | 0.9500    |
| C(10')-C(11') | 1.368(11) |
| C(10')-H(10') | 0.9500    |
| C(10S)-C(11S) | 1.345(14) |
| C(10S)-H(1)   | 0.9500    |
| C(11')-C(12') | 1.367(12) |
| C(11')-H(11') | 0.9500    |
| C(11S)-C(12S) | 1.379(14) |
| C(11S)-H(6)   | 0.9500    |
| C(12')-C(13') | 1.370(11) |
| C(12')-H(12') | 0.9500    |
| C(12S)-C(13S) | 1.378(14) |
| C(12S)-H(12Z) | 0.9500    |
| C(13')-C(14') | 1.47(2)   |
| C(13S)-H(13Y) | 0.9500    |
| C(14')-H(14K) | 0.9800    |

|                            |            |
|----------------------------|------------|
| C(14 <sup>l</sup> )-H(14L) | 0.9800     |
| C(14 <sup>l</sup> )-H(14M) | 0.9800     |
| C(14S)-H(14N)              | 0.9800     |
| C(14S)-H(14O)              | 0.9800     |
| C(14S)-H(14P)              | 0.9800     |
| C(15S)-C(16S)              | 1.388(10)  |
| C(15S)-C(20S)              | 1.389(11)  |
| C(15S)-C(21S)              | 1.507(10)  |
| C(16S)-C(17S)              | 1.378(11)  |
| C(16S)-H(16S)              | 0.9500     |
| C(17S)-C(18S)              | 1.343(13)  |
| C(17S)-H(17S)              | 0.9500     |
| C(18S)-C(19S)              | 1.414(14)  |
| C(18S)-H(18S)              | 0.9500     |
| C(19S)-C(20S)              | 1.375(13)  |
| C(19S)-H(19S)              | 0.9500     |
| C(20S)-H(20S)              | 0.9500     |
| C(21S)-H(21F)              | 0.9800     |
| C(21S)-H(21G)              | 0.9800     |
| C(21S)-H(21H)              | 0.9800     |
| O(1)-Tb(1)-O(4)            | 77.31(13)  |
| O(1)-Tb(1)-O(5)            | 147.26(12) |
| O(4)-Tb(1)-O(5)            | 82.55(14)  |
| O(1)-Tb(1)-O(3)            | 117.93(14) |
| O(4)-Tb(1)-O(3)            | 72.36(14)  |
| O(5)-Tb(1)-O(3)            | 79.05(14)  |
| O(1)-Tb(1)-O(6)            | 79.14(12)  |
| O(4)-Tb(1)-O(6)            | 77.24(13)  |
| O(5)-Tb(1)-O(6)            | 71.36(13)  |
| O(3)-Tb(1)-O(6)            | 139.78(12) |
| O(1)-Tb(1)-O(2)            | 72.13(12)  |
| O(4)-Tb(1)-O(2)            | 116.24(14) |
| O(5)-Tb(1)-O(2)            | 140.53(12) |
| O(3)-Tb(1)-O(2)            | 75.00(12)  |
| O(6)-Tb(1)-O(2)            | 143.68(12) |
| O(1)-Tb(1)-N(1)            | 138.15(12) |
| O(4)-Tb(1)-N(1)            | 141.59(13) |
| O(5)-Tb(1)-N(1)            | 70.53(13)  |
| O(3)-Tb(1)-N(1)            | 75.93(15)  |
| O(6)-Tb(1)-N(1)            | 116.98(14) |
| O(2)-Tb(1)-N(1)            | 74.62(13)  |
| O(1)-Tb(1)-N(6)#1          | 74.53(13)  |
| O(4)-Tb(1)-N(6)#1          | 143.24(13) |
| O(5)-Tb(1)-N(6)#1          | 109.83(14) |
| O(3)-Tb(1)-N(6)#1          | 142.73(13) |
| O(6)-Tb(1)-N(6)#1          | 74.66(12)  |
| O(2)-Tb(1)-N(6)#1          | 76.60(13)  |
| N(1)-Tb(1)-N(6)#1          | 73.63(13)  |
| O(8)-Tb(2)-O(10)           | 86.40(15)  |
| O(8)-Tb(2)-O(11)           | 74.62(14)  |
| O(10)-Tb(2)-O(11)          | 147.07(14) |
| O(8)-Tb(2)-O(9)            | 81.37(17)  |
| O(10)-Tb(2)-O(9)           | 72.16(15)  |
| O(11)-Tb(2)-O(9)           | 78.46(14)  |
| O(8)-Tb(2)-O(12)           | 143.15(15) |
| O(10)-Tb(2)-O(12)          | 112.57(14) |
| O(11)-Tb(2)-O(12)          | 72.91(12)  |
| O(9)-Tb(2)-O(12)           | 75.52(14)  |
| O(8)-Tb(2)-O(7)            | 71.37(15)  |
| O(10)-Tb(2)-O(7)           | 76.37(14)  |
| O(11)-Tb(2)-O(7)           | 120.46(13) |

|                     |            |
|---------------------|------------|
| O(9)-Tb(2)-O(7)     | 139.26(14) |
| O(12)-Tb(2)-O(7)    | 141.93(13) |
| O(8)-Tb(2)-N(8)#2   | 144.02(15) |
| O(10)-Tb(2)-N(8)#2  | 72.05(14)  |
| O(11)-Tb(2)-N(8)#2  | 136.70(13) |
| O(9)-Tb(2)-N(8)#2   | 116.90(14) |
| O(12)-Tb(2)-N(8)#2  | 72.79(14)  |
| O(7)-Tb(2)-N(8)#2   | 75.66(14)  |
| O(8)-Tb(2)-N(7)     | 104.32(16) |
| O(10)-Tb(2)-N(7)    | 141.13(15) |
| O(11)-Tb(2)-N(7)    | 70.86(14)  |
| O(9)-Tb(2)-N(7)     | 145.67(14) |
| O(12)-Tb(2)-N(7)    | 80.97(13)  |
| O(7)-Tb(2)-N(7)     | 72.24(13)  |
| N(8)#2-Tb(2)-N(7)   | 78.37(14)  |
| O(13)-Cs(1)-O(17)   | 113.6(3)   |
| O(13)-Cs(1)-O(18)   | 142.7(3)   |
| O(17)-Cs(1)-O(18)   | 54.4(3)    |
| O(18')-Cs(1)-O(13') | 146.1(4)   |
| O(13)-Cs(1)-O(14)   | 56.4(4)    |
| O(17)-Cs(1)-O(14)   | 135.1(2)   |
| O(18)-Cs(1)-O(14)   | 104.7(3)   |
| O(18')-Cs(1)-O(14') | 109.4(4)   |
| O(13')-Cs(1)-O(14') | 53.3(5)    |
| O(18')-Cs(1)-N(5)   | 92.4(2)    |
| O(13)-Cs(1)-N(5)    | 118.8(2)   |
| O(17)-Cs(1)-N(5)    | 100.18(19) |
| O(18)-Cs(1)-N(5)    | 98.5(2)    |
| O(13')-Cs(1)-N(5)   | 121.4(4)   |
| O(14)-Cs(1)-N(5)    | 123.50(19) |
| O(14')-Cs(1)-N(5)   | 126.9(2)   |
| O(18')-Cs(1)-O(17') | 52.8(3)    |
| O(13')-Cs(1)-O(17') | 107.4(5)   |
| O(14')-Cs(1)-O(17') | 121.1(3)   |
| N(5)-Cs(1)-O(17')   | 110.7(2)   |
| O(18')-Cs(1)-N(10') | 54.8(4)    |
| O(13')-Cs(1)-N(10') | 103.5(5)   |
| O(14')-Cs(1)-N(10') | 54.8(4)    |
| N(5)-Cs(1)-N(10')   | 120.0(3)   |
| O(17')-Cs(1)-N(10') | 88.7(4)    |
| O(18')-Cs(1)-C(40)  | 116.7(3)   |
| O(13)-Cs(1)-C(40)   | 95.7(3)    |
| O(17)-Cs(1)-C(40)   | 105.10(19) |
| O(18)-Cs(1)-C(40)   | 121.1(2)   |
| O(13')-Cs(1)-C(40)  | 97.1(4)    |
| O(14)-Cs(1)-C(40)   | 118.9(2)   |
| O(14')-Cs(1)-C(40)  | 115.5(3)   |
| N(5)-Cs(1)-C(40)    | 24.35(12)  |
| O(17')-Cs(1)-C(40)  | 122.2(2)   |
| N(10')-Cs(1)-C(40)  | 135.3(3)   |
| O(13)-Cs(1)-N(9)    | 56.4(4)    |
| O(17)-Cs(1)-N(9)    | 57.2(4)    |
| O(18)-Cs(1)-N(9)    | 102.9(4)   |
| O(14)-Cs(1)-N(9)    | 99.4(4)    |
| N(5)-Cs(1)-N(9)     | 124.6(3)   |
| C(40)-Cs(1)-N(9)    | 106.6(3)   |
| O(23)-Cs(2)-O(21)   | 111.6(3)   |
| O(23)-Cs(2)-O(24)   | 55.9(2)    |
| O(21)-Cs(2)-O(24)   | 134.1(3)   |
| O(23)-Cs(2)-O(22)   | 145.3(2)   |
| O(21)-Cs(2)-O(22)   | 53.5(3)    |
| O(24)-Cs(2)-O(22)   | 108.8(2)   |

|                      |            |
|----------------------|------------|
| O(23)-Cs(2)-N(11)    | 58.1(2)    |
| O(21)-Cs(2)-N(11)    | 54.8(3)    |
| O(24)-Cs(2)-N(11)    | 104.91(19) |
| O(22)-Cs(2)-N(11)    | 105.1(2)   |
| O(23)-Cs(2)-N(12)    | 107.2(2)   |
| O(21)-Cs(2)-N(12)    | 103.4(3)   |
| O(24)-Cs(2)-N(12)    | 53.8(2)    |
| O(22)-Cs(2)-N(12)    | 56.8(2)    |
| N(11)-Cs(2)-N(12)    | 128.39(17) |
| O(23)-Cs(2)-N(3)     | 88.76(17)  |
| O(21)-Cs(2)-N(3)     | 98.4(3)    |
| O(24)-Cs(2)-N(3)     | 122.78(16) |
| O(22)-Cs(2)-N(3)     | 122.25(17) |
| N(11)-Cs(2)-N(3)     | 86.08(13)  |
| N(12)-Cs(2)-N(3)     | 145.49(15) |
| O(23)-Cs(2)-N(4)     | 116.19(18) |
| O(21)-Cs(2)-N(4)     | 122.3(3)   |
| O(24)-Cs(2)-N(4)     | 99.66(15)  |
| O(22)-Cs(2)-N(4)     | 96.11(19)  |
| N(11)-Cs(2)-N(4)     | 139.88(13) |
| N(12)-Cs(2)-N(4)     | 91.72(15)  |
| N(3)-Cs(2)-N(4)      | 53.86(10)  |
| O(23)-Cs(2)-C(53)    | 134.88(18) |
| O(21)-Cs(2)-C(53)    | 99.2(3)    |
| O(24)-Cs(2)-C(53)    | 120.52(16) |
| O(22)-Cs(2)-C(53)    | 79.66(18)  |
| N(11)-Cs(2)-C(53)    | 130.28(14) |
| N(12)-Cs(2)-C(53)    | 96.24(17)  |
| N(3)-Cs(2)-C(53)     | 53.66(12)  |
| N(4)-Cs(2)-C(53)     | 23.24(10)  |
| O(23)-Cs(2)-C(142)   | 98.4(3)    |
| O(21)-Cs(2)-C(142)   | 126.8(3)   |
| O(24)-Cs(2)-C(142)   | 42.9(3)    |
| O(22)-Cs(2)-C(142)   | 76.7(3)    |
| N(11)-Cs(2)-C(142)   | 141.9(2)   |
| N(12)-Cs(2)-C(142)   | 23.8(2)    |
| N(3)-Cs(2)-C(142)    | 125.92(17) |
| N(4)-Cs(2)-C(142)    | 75.63(17)  |
| C(53)-Cs(2)-C(142)   | 87.75(19)  |
| O(23)-Cs(2)-C(131)   | 78.3(3)    |
| O(21)-Cs(2)-C(131)   | 42.0(4)    |
| O(24)-Cs(2)-C(131)   | 128.7(3)   |
| O(22)-Cs(2)-C(131)   | 95.4(3)    |
| N(11)-Cs(2)-C(131)   | 23.8(3)    |
| N(12)-Cs(2)-C(131)   | 139.6(3)   |
| N(3)-Cs(2)-C(131)    | 72.6(2)    |
| N(4)-Cs(2)-C(131)    | 122.5(3)   |
| C(53)-Cs(2)-C(131)   | 107.7(3)   |
| C(142)-Cs(2)-C(131)  | 161.3(3)   |
| O(23)-Cs(2)-C(136)   | 131.0(2)   |
| O(21)-Cs(2)-C(136)   | 91.5(3)    |
| O(24)-Cs(2)-C(136)   | 76.7(2)    |
| O(22)-Cs(2)-C(136)   | 38.7(2)    |
| N(11)-Cs(2)-C(136)   | 135.45(17) |
| N(12)-Cs(2)-C(136)   | 23.80(19)  |
| N(3)-Cs(2)-C(136)    | 131.37(13) |
| N(4)-Cs(2)-C(136)    | 80.72(13)  |
| C(53)-Cs(2)-C(136)   | 77.80(14)  |
| C(142)-Cs(2)-C(136)  | 38.4(2)    |
| C(131)-Cs(2)-C(136)  | 133.3(3)   |
| O(23')-Cs(2')-O(24') | 55.5(10)   |
| O(23')-Cs(2')-O(22') | 133.1(7)   |

|                      |            |
|----------------------|------------|
| O(24')-Cs(2')-O(22') | 108.1(8)   |
| O(23')-Cs(2')-O(21') | 105.2(10)  |
| O(24')-Cs(2')-O(21') | 139.6(9)   |
| O(22')-Cs(2')-O(21') | 56.3(9)    |
| O(23')-Cs(2')-N(3)   | 99.2(6)    |
| O(24')-Cs(2')-N(3)   | 127.7(7)   |
| O(22')-Cs(2')-N(3)   | 119.9(4)   |
| O(21')-Cs(2')-N(3)   | 87.3(8)    |
| O(23')-Cs(2')-N(11)  | 49.5(6)    |
| O(24')-Cs(2')-N(11)  | 100.6(8)   |
| O(22')-Cs(2')-N(11)  | 104.3(4)   |
| O(21')-Cs(2')-N(11)  | 56.7(8)    |
| N(3)-Cs(2')-N(11)    | 87.26(14)  |
| O(23')-Cs(2')-N(12') | 103.6(6)   |
| O(24')-Cs(2')-N(12') | 55.7(8)    |
| O(22')-Cs(2')-N(12') | 54.2(4)    |
| O(21')-Cs(2')-N(12') | 106.0(9)   |
| N(3)-Cs(2')-N(12')   | 149.4(3)   |
| N(11)-Cs(2')-N(12')  | 123.2(3)   |
| O(23')-Cs(2')-N(4)   | 141.1(6)   |
| O(24')-Cs(2')-N(4)   | 114.1(7)   |
| O(22')-Cs(2')-N(4)   | 85.3(3)    |
| O(21')-Cs(2')-N(4)   | 102.2(8)   |
| N(3)-Cs(2')-N(4)     | 55.01(11)  |
| N(11)-Cs(2')-N(4)    | 139.30(15) |
| N(12')-Cs(2')-N(4)   | 94.8(3)    |
| O(23')-Cs(2')-C(23A) | 127.6(7)   |
| O(24')-Cs(2')-C(23A) | 77.0(9)    |
| O(22')-Cs(2')-C(23A) | 40.6(6)    |
| O(21')-Cs(2')-C(23A) | 96.9(10)   |
| N(3)-Cs(2')-C(23A)   | 129.2(4)   |
| N(11)-Cs(2')-C(23A)  | 136.3(5)   |
| N(12')-Cs(2')-C(23A) | 24.0(3)    |
| N(4)-Cs(2')-C(23A)   | 74.8(4)    |
| O(23')-Cs(2')-C(141) | 93.5(6)    |
| O(24')-Cs(2')-C(141) | 38.7(8)    |
| O(22')-Cs(2')-C(141) | 77.0(4)    |
| O(21')-Cs(2')-C(141) | 130.1(8)   |
| N(3)-Cs(2')-C(141)   | 135.40(18) |
| N(11)-Cs(2')-C(141)  | 131.15(17) |
| N(12')-Cs(2')-C(141) | 24.1(3)    |
| N(4)-Cs(2')-C(141)   | 89.47(14)  |
| C(23A)-Cs(2')-C(141) | 39.4(4)    |
| O(23')-Cs(2')-C(24A) | 39.5(10)   |
| O(24')-Cs(2')-C(24A) | 94.9(12)   |
| O(22')-Cs(2')-C(24A) | 123.7(8)   |
| O(21')-Cs(2')-C(24A) | 72.7(11)   |
| N(3)-Cs(2')-C(24A)   | 75.8(9)    |
| N(11)-Cs(2')-C(24A)  | 19.6(7)    |
| N(12')-Cs(2')-C(24A) | 134.2(10)  |
| N(4)-Cs(2')-C(24A)   | 130.8(10)  |
| C(23A)-Cs(2')-C(24A) | 153.3(10)  |
| C(141)-Cs(2')-C(24A) | 132.1(10)  |
| O(23')-Cs(2')-C(53)  | 151.4(6)   |
| O(24')-Cs(2')-C(53)  | 135.1(7)   |
| O(22')-Cs(2')-C(53)  | 73.5(3)    |
| O(21')-Cs(2')-C(53)  | 80.1(8)    |
| N(3)-Cs(2')-C(53)    | 52.55(12)  |
| N(11)-Cs(2')-C(53)   | 122.99(17) |
| N(12')-Cs(2')-C(53)  | 101.7(3)   |
| N(4)-Cs(2')-C(53)    | 22.15(10)  |
| C(23A)-Cs(2')-C(53)  | 78.3(4)    |

|                      |            |
|----------------------|------------|
| C(141)-Cs(2')-C(53)  | 104.47(15) |
| C(24A)-Cs(2')-C(53)  | 122.2(10)  |
| C(1)-O(1)-Tb(1)      | 138.3(3)   |
| C(3)-O(2)-Tb(1)      | 136.7(3)   |
| C(12)-O(3)-Tb(1)     | 135.7(4)   |
| C(14)-O(4)-Tb(1)     | 138.7(4)   |
| C(23)-O(5)-Tb(1)     | 136.0(4)   |
| C(25)-O(6)-Tb(1)     | 134.0(3)   |
| C(74)-O(7)-Tb(2)     | 132.6(4)   |
| C(76)-O(8)-Tb(2)     | 133.6(4)   |
| C(85)-O(9)-Tb(2)     | 137.5(4)   |
| C(87)-O(10)-Tb(2)    | 138.8(4)   |
| C(96)-O(11)-Tb(2)    | 136.3(3)   |
| C(98)-O(12)-Tb(2)    | 134.9(3)   |
| C(108)-O(13)-C(109)  | 108.7(15)  |
| C(108)-O(13)-Cs(1)   | 126.6(12)  |
| C(109)-O(13)-Cs(1)   | 119.3(10)  |
| C(2A)-O(13')-C(3A)   | 123(3)     |
| C(2A)-O(13')-Cs(1)   | 119(2)     |
| C(3A)-O(13')-Cs(1)   | 117.2(14)  |
| C(110)-O(14)-C(111)  | 113.7(12)  |
| C(110)-O(14)-Cs(1)   | 98.5(10)   |
| C(111)-O(14)-Cs(1)   | 93.5(8)    |
| C(4A)-O(14')-C(5A)   | 114.0(17)  |
| C(4A)-O(14')-Cs(1)   | 99.0(15)   |
| C(5A)-O(14')-Cs(1)   | 89.2(10)   |
| C(114)-O(15)-C(115)  | 113.4(6)   |
| C(116)-O(16)-C(117)  | 114.2(5)   |
| C(121)-O(17)-C(120)  | 110.8(12)  |
| C(121)-O(17)-Cs(1)   | 120.6(10)  |
| C(120)-O(17)-Cs(1)   | 119.3(10)  |
| C(11A)-O(17')-C(10A) | 112.4(18)  |
| C(11A)-O(17')-Cs(1)  | 88.6(13)   |
| C(10A)-O(17')-Cs(1)  | 114.0(11)  |
| C(123)-O(18)-C(122)  | 116.6(16)  |
| C(123)-O(18)-Cs(1)   | 117.9(11)  |
| C(122)-O(18)-Cs(1)   | 111.9(10)  |
| C(13A)-O(18')-C(12A) | 113.1(17)  |
| C(13A)-O(18')-Cs(1)  | 126.5(15)  |
| C(12A)-O(18')-Cs(1)  | 120.3(9)   |
| C(127)-O(19)-C(126)  | 102.4(11)  |
| C(16A)-O(19')-C(127) | 111.2(10)  |
| C(129)-O(20)-C(128)  | 113.7(7)   |
| C(129)-O(20')-C(17A) | 123(3)     |
| C(133)-O(21)-C(132)  | 116.5(11)  |
| C(133)-O(21)-Cs(2)   | 124.7(9)   |
| C(132)-O(21)-Cs(2)   | 115.6(8)   |
| C(20A)-O(21')-C(21A) | 110(3)     |
| C(20A)-O(21')-Cs(2') | 126(3)     |
| C(21A)-O(21')-Cs(2') | 114(3)     |
| C(135)-O(22)-C(134)  | 112.0(9)   |
| C(135)-O(22)-Cs(2)   | 117.5(6)   |
| C(134)-O(22)-Cs(2)   | 114.6(7)   |
| C(22A)-O(22')-C(136) | 121(2)     |
| C(22A)-O(22')-Cs(2') | 113(2)     |
| C(136)-O(22')-Cs(2') | 116.7(10)  |
| C(138)-O(23)-C(139)  | 111.8(10)  |
| C(138)-O(23)-Cs(2)   | 121.8(8)   |
| C(139)-O(23)-Cs(2)   | 119.5(8)   |
| C(25A)-O(23')-C(26A) | 114(3)     |
| C(25A)-O(23')-Cs(2') | 120(2)     |
| C(26A)-O(23')-Cs(2') | 117.8(19)  |

|                      |            |
|----------------------|------------|
| C(140)-O(24)-C(141)  | 115.2(9)   |
| C(140)-O(24)-Cs(2)   | 111.8(8)   |
| C(141)-O(24)-Cs(2)   | 113.5(5)   |
| C(28A)-O(24')-C(27A) | 113(3)     |
| C(28A)-O(24')-Cs(2') | 123(2)     |
| C(27A)-O(24')-Cs(2') | 117(2)     |
| C(34)-N(1)-C(38)     | 117.0(5)   |
| C(34)-N(1)-Tb(1)     | 120.3(4)   |
| C(38)-N(1)-Tb(1)     | 122.1(4)   |
| C(70)-N(2)-C(73)     | 110.5(4)   |
| C(70)-N(2)-Cs(1)     | 127.6(3)   |
| C(73)-N(2)-Cs(1)     | 86.1(3)    |
| C(70)-N(2)-H(2)      | 124.7      |
| C(73)-N(2)-H(2)      | 124.7      |
| Cs(1)-N(2)-H(2)      | 61.5       |
| C(60)-N(3)-C(63)     | 104.5(4)   |
| C(60)-N(3)-Cs(2')    | 105.9(3)   |
| C(63)-N(3)-Cs(2')    | 125.8(3)   |
| C(60)-N(3)-Cs(2)     | 96.3(3)    |
| C(63)-N(3)-Cs(2)     | 128.5(3)   |
| C(60)-N(3)-H(3)      | 127.8      |
| C(63)-N(3)-H(3)      | 127.8      |
| Cs(2)-N(3)-H(3)      | 53.3       |
| C(50)-N(4)-C(53)     | 110.5(4)   |
| C(50)-N(4)-Cs(2')    | 110.9(3)   |
| C(53)-N(4)-Cs(2')    | 92.9(3)    |
| C(50)-N(4)-Cs(2)     | 110.5(3)   |
| C(53)-N(4)-Cs(2)     | 84.1(3)    |
| C(50)-N(4)-H(4)      | 124.7      |
| C(53)-N(4)-H(4)      | 124.7      |
| Cs(2)-N(4)-H(4)      | 77.5       |
| C(40)-N(5)-C(43)     | 105.6(4)   |
| C(40)-N(5)-Cs(1)     | 81.1(3)    |
| C(43)-N(5)-Cs(1)     | 93.1(3)    |
| C(40)-N(5)-Cs(2')    | 124.0(3)   |
| C(43)-N(5)-Cs(2')    | 115.6(3)   |
| Cs(1)-N(5)-Cs(2')    | 129.78(13) |
| C(40)-N(5)-H(5)      | 127.2      |
| C(43)-N(5)-H(5)      | 127.2      |
| Cs(1)-N(5)-H(5)      | 94.8       |
| Cs(2')-N(5)-H(5)     | 35.0       |
| C(49)-N(6)-C(47)     | 115.6(4)   |
| C(49)-N(6)-Tb(1)#1   | 121.3(3)   |
| C(47)-N(6)-Tb(1)#1   | 122.0(3)   |
| C(57)-N(7)-C(59)     | 116.4(4)   |
| C(57)-N(7)-Tb(2)     | 118.7(3)   |
| C(59)-N(7)-Tb(2)     | 122.4(3)   |
| C(67)-N(8)-C(69)     | 117.4(5)   |
| C(67)-N(8)-Tb(2)#2   | 124.3(3)   |
| C(69)-N(8)-Tb(2)#2   | 117.8(4)   |
| C(113)-N(9)-C(119)   | 111.4(14)  |
| C(113)-N(9)-C(107)   | 109.5(16)  |
| C(119)-N(9)-C(107)   | 105.8(16)  |
| C(113)-N(9)-Cs(1)    | 140.2(11)  |
| C(119)-N(9)-Cs(1)    | 91.8(10)   |
| C(107)-N(9)-Cs(1)    | 93.5(11)   |
| C(9A)-N(9')-C(1A)    | 115(3)     |
| C(9A)-N(9')-C(7A)    | 116.9(19)  |
| C(1A)-N(9')-C(7A)    | 109(2)     |
| C(9A)-N(9')-Cs(1)    | 87.4(17)   |
| C(1A)-N(9')-Cs(1)    | 87.2(12)   |
| C(7A)-N(9')-Cs(1)    | 138.7(14)  |

|                      |           |
|----------------------|-----------|
| C(112)-N(10)-C(118)  | 113.4(14) |
| C(112)-N(10)-C(124)  | 112.0(14) |
| C(118)-N(10)-C(124)  | 115.3(15) |
| C(112)-N(10)-Cs(1)   | 105.2(10) |
| C(118)-N(10)-Cs(1)   | 117.4(10) |
| C(124)-N(10)-Cs(1)   | 91.3(12)  |
| C(6A)-N(10')-C(8A)   | 110(2)    |
| C(6A)-N(10')-C(14A)  | 111.9(18) |
| C(8A)-N(10')-C(14A)  | 108.6(16) |
| C(6A)-N(10')-Cs(1)   | 109.0(15) |
| C(8A)-N(10')-Cs(1)   | 121.7(13) |
| C(14A)-N(10')-Cs(1)  | 95.2(11)  |
| C(125)-N(11)-C(131)  | 118.7(12) |
| C(24A)-N(11)-C(19A)  | 110(4)    |
| C(24A)-N(11)-C(15A)  | 104(3)    |
| C(19A)-N(11)-C(15A)  | 102(4)    |
| C(125)-N(11)-C(137)  | 113.9(13) |
| C(131)-N(11)-C(137)  | 108.4(10) |
| C(125)-N(11)-Cs(2)   | 123.7(6)  |
| C(131)-N(11)-Cs(2)   | 92.9(11)  |
| C(137)-N(11)-Cs(2)   | 95.4(7)   |
| C(24A)-N(11)-Cs(2')  | 100(2)    |
| C(19A)-N(11)-Cs(2')  | 98(3)     |
| C(15A)-N(11)-Cs(2')  | 141.7(11) |
| C(142)-N(12)-C(130)  | 114.7(8)  |
| C(142)-N(12)-C(136)  | 109.0(8)  |
| C(130)-N(12)-C(136)  | 113.3(8)  |
| C(142)-N(12)-Cs(2)   | 89.8(6)   |
| C(130)-N(12)-Cs(2)   | 132.3(6)  |
| C(136)-N(12)-Cs(2)   | 93.9(5)   |
| C(18A)-N(12')-C(23A) | 110(2)    |
| C(18A)-N(12')-C(141) | 115.3(19) |
| C(23A)-N(12')-C(141) | 111.6(17) |
| C(18A)-N(12')-Cs(2') | 136.2(16) |
| C(23A)-N(12')-Cs(2') | 90.0(12)  |
| C(141)-N(12')-Cs(2') | 90.2(8)   |
| O(1)-C(1)-C(2)       | 124.2(5)  |
| O(1)-C(1)-C(4)       | 114.6(5)  |
| C(2)-C(1)-C(4)       | 121.2(4)  |
| C(2A)-C(1A)-N(9')    | 117(2)    |
| C(2A)-C(1A)-Cs(1)    | 87.8(17)  |
| N(9')-C(1A)-Cs(1)    | 68.8(11)  |
| C(2A)-C(1A)-H(1AA)   | 108.0     |
| N(9')-C(1A)-H(1AA)   | 108.0     |
| Cs(1)-C(1A)-H(1AA)   | 162.8     |
| C(2A)-C(1A)-H(1AB)   | 108.0     |
| N(9')-C(1A)-H(1AB)   | 108.0     |
| Cs(1)-C(1A)-H(1AB)   | 60.0      |
| H(1AA)-C(1A)-H(1AB)  | 107.3     |
| C(3)-C(2)-C(1)       | 124.3(5)  |
| C(3)-C(2)-H(2A)      | 117.9     |
| C(1)-C(2)-H(2A)      | 117.9     |
| O(13')-C(2A)-C(1A)   | 114(3)    |
| O(13')-C(2A)-Cs(1)   | 43.8(18)  |
| C(1A)-C(2A)-Cs(1)    | 70.1(16)  |
| O(13')-C(2A)-H(2AA)  | 108.8     |
| C(1A)-C(2A)-H(2AA)   | 108.8     |
| Cs(1)-C(2A)-H(2AA)   | 122.7     |
| O(13')-C(2A)-H(2AB)  | 108.8     |
| C(1A)-C(2A)-H(2AB)   | 108.8     |
| Cs(1)-C(2A)-H(2AB)   | 127.4     |
| H(2AA)-C(2A)-H(2AB)  | 107.7     |

|                     |           |
|---------------------|-----------|
| O(2)-C(3)-C(2)      | 124.3(5)  |
| O(2)-C(3)-C(8)      | 113.8(5)  |
| C(2)-C(3)-C(8)      | 121.9(5)  |
| O(13')-C(3A)-C(4A)  | 108(2)    |
| O(13')-C(3A)-H(3AA) | 110.1     |
| C(4A)-C(3A)-H(3AA)  | 110.1     |
| O(13')-C(3A)-H(3AB) | 110.1     |
| C(4A)-C(3A)-H(3AB)  | 110.1     |
| H(3AA)-C(3A)-H(3AB) | 108.4     |
| C(7)-C(4)-C(5)      | 109.5(5)  |
| C(7)-C(4)-C(1)      | 115.0(5)  |
| C(5)-C(4)-C(1)      | 107.7(5)  |
| C(7)-C(4)-C(6)      | 109.0(5)  |
| C(5)-C(4)-C(6)      | 108.4(6)  |
| C(1)-C(4)-C(6)      | 107.0(5)  |
| O(14')-C(4A)-C(3A)  | 103(2)    |
| O(14')-C(4A)-Cs(1)  | 60.1(12)  |
| C(3A)-C(4A)-Cs(1)   | 90.5(14)  |
| O(14')-C(4A)-H(4AA) | 111.1     |
| C(3A)-C(4A)-H(4AA)  | 111.1     |
| Cs(1)-C(4A)-H(4AA)  | 158.3     |
| O(14')-C(4A)-H(4AB) | 111.1     |
| C(3A)-C(4A)-H(4AB)  | 111.1     |
| Cs(1)-C(4A)-H(4AB)  | 61.8      |
| H(4AA)-C(4A)-H(4AB) | 109.1     |
| C(4)-C(5)-H(5A)     | 109.5     |
| C(4)-C(5)-H(5B)     | 109.5     |
| H(5A)-C(5)-H(5B)    | 109.5     |
| C(4)-C(5)-H(5C)     | 109.5     |
| H(5A)-C(5)-H(5C)    | 109.5     |
| H(5B)-C(5)-H(5C)    | 109.5     |
| C(6A)-C(5A)-O(14')  | 112(2)    |
| C(6A)-C(5A)-Cs(1)   | 96.8(15)  |
| O(14')-C(5A)-Cs(1)  | 63.6(9)   |
| C(6A)-C(5A)-H(5AA)  | 109.3     |
| O(14')-C(5A)-H(5AA) | 109.3     |
| Cs(1)-C(5A)-H(5AA)  | 153.4     |
| C(6A)-C(5A)-H(5AB)  | 109.3     |
| O(14')-C(5A)-H(5AB) | 109.3     |
| Cs(1)-C(5A)-H(5AB)  | 56.4      |
| H(5AA)-C(5A)-H(5AB) | 108.0     |
| C(4)-C(6)-H(6A)     | 109.5     |
| C(4)-C(6)-H(6B)     | 109.5     |
| H(6A)-C(6)-H(6B)    | 109.5     |
| C(4)-C(6)-H(6C)     | 109.5     |
| H(6A)-C(6)-H(6C)    | 109.5     |
| H(6B)-C(6)-H(6C)    | 109.5     |
| C(5A)-C(6A)-N(10')  | 115(2)    |
| C(5A)-C(6A)-H(6AA)  | 108.5     |
| N(10')-C(6A)-H(6AA) | 108.5     |
| C(5A)-C(6A)-H(6AB)  | 108.5     |
| N(10')-C(6A)-H(6AB) | 108.5     |
| H(6AA)-C(6A)-H(6AB) | 107.5     |
| C(4)-C(7)-H(7A)     | 109.5     |
| C(4)-C(7)-H(7B)     | 109.5     |
| H(7A)-C(7)-H(7B)    | 109.5     |
| C(4)-C(7)-H(7C)     | 109.5     |
| H(7A)-C(7)-H(7C)    | 109.5     |
| H(7B)-C(7)-H(7C)    | 109.5     |
| N(9')-C(7A)-C(114)  | 111.1(18) |
| N(9')-C(7A)-H(7AA)  | 109.4     |
| C(114)-C(7A)-H(7AA) | 109.4     |

|                      |           |
|----------------------|-----------|
| N(9')-C(7A)-H(7AB)   | 109.4     |
| C(114)-C(7A)-H(7AB)  | 109.4     |
| H(7AA)-C(7A)-H(7AB)  | 108.0     |
| C(11)-C(8)-C(10)     | 110.4(5)  |
| C(11)-C(8)-C(9)      | 109.4(5)  |
| C(10)-C(8)-C(9)      | 109.6(5)  |
| C(11)-C(8)-C(3)      | 107.4(5)  |
| C(10)-C(8)-C(3)      | 107.3(5)  |
| C(9)-C(8)-C(3)       | 112.8(5)  |
| N(10')-C(8A)-C(117)  | 110.3(19) |
| N(10')-C(8A)-H(8AA)  | 109.6     |
| C(117)-C(8A)-H(8AA)  | 109.6     |
| N(10')-C(8A)-H(8AB)  | 109.6     |
| C(117)-C(8A)-H(8AB)  | 109.6     |
| H(8AA)-C(8A)-H(8AB)  | 108.1     |
| C(8)-C(9)-H(9A)      | 109.5     |
| C(8)-C(9)-H(9B)      | 109.5     |
| H(9A)-C(9)-H(9B)     | 109.5     |
| C(8)-C(9)-H(9C)      | 109.5     |
| H(9A)-C(9)-H(9C)     | 109.5     |
| H(9B)-C(9)-H(9C)     | 109.5     |
| N(9')-C(9A)-C(10A)   | 116(3)    |
| N(9')-C(9A)-Cs(1)    | 69.8(14)  |
| C(10A)-C(9A)-Cs(1)   | 94.8(16)  |
| N(9')-C(9A)-H(9AA)   | 108.4     |
| C(10A)-C(9A)-H(9AA)  | 108.4     |
| Cs(1)-C(9A)-H(9AA)   | 154.1     |
| N(9')-C(9A)-H(9AB)   | 108.4     |
| C(10A)-C(9A)-H(9AB)  | 108.4     |
| Cs(1)-C(9A)-H(9AB)   | 52.5      |
| H(9AA)-C(9A)-H(9AB)  | 107.4     |
| C(8)-C(10)-H(10A)    | 109.5     |
| C(8)-C(10)-H(10B)    | 109.5     |
| H(10A)-C(10)-H(10B)  | 109.5     |
| C(8)-C(10)-H(10C)    | 109.5     |
| H(10A)-C(10)-H(10C)  | 109.5     |
| H(10B)-C(10)-H(10C)  | 109.5     |
| O(17')-C(10A)-C(9A)  | 109.4(17) |
| O(17')-C(10A)-H(10D) | 109.8     |
| C(9A)-C(10A)-H(10D)  | 109.8     |
| O(17')-C(10A)-H(10E) | 109.8     |
| C(9A)-C(10A)-H(10E)  | 109.8     |
| H(10D)-C(10A)-H(10E) | 108.2     |
| C(8)-C(11)-H(11A)    | 109.5     |
| C(8)-C(11)-H(11B)    | 109.5     |
| H(11A)-C(11)-H(11B)  | 109.5     |
| C(8)-C(11)-H(11C)    | 109.5     |
| H(11A)-C(11)-H(11C)  | 109.5     |
| H(11B)-C(11)-H(11C)  | 109.5     |
| O(17')-C(11A)-C(12A) | 110(2)    |
| O(17')-C(11A)-Cs(1)  | 68.2(11)  |
| C(12A)-C(11A)-Cs(1)  | 90.4(13)  |
| O(17')-C(11A)-H(11D) | 109.8     |
| C(12A)-C(11A)-H(11D) | 109.8     |
| Cs(1)-C(11A)-H(11D)  | 158.5     |
| O(17')-C(11A)-H(11E) | 109.8     |
| C(12A)-C(11A)-H(11E) | 109.8     |
| Cs(1)-C(11A)-H(11E)  | 55.9      |
| H(11D)-C(11A)-H(11E) | 108.2     |
| O(3)-C(12)-C(13)     | 124.8(6)  |
| O(3)-C(12)-C(15')    | 121.4(8)  |
| C(13)-C(12)-C(15')   | 113.1(8)  |

|                      |           |
|----------------------|-----------|
| O(3)-C(12)-C(15)     | 110.4(8)  |
| C(13)-C(12)-C(15)    | 123.7(8)  |
| O(18')-C(12A)-C(11A) | 105.2(14) |
| O(18')-C(12A)-Cs(1)  | 40.0(6)   |
| C(11A)-C(12A)-Cs(1)  | 66.0(11)  |
| O(18')-C(12A)-H(12A) | 110.7     |
| C(11A)-C(12A)-H(12A) | 110.7     |
| Cs(1)-C(12A)-H(12A)  | 117.1     |
| O(18')-C(12A)-H(12B) | 110.7     |
| C(11A)-C(12A)-H(12B) | 110.7     |
| Cs(1)-C(12A)-H(12B)  | 131.9     |
| H(12A)-C(12A)-H(12B) | 108.8     |
| C(12)-C(13)-C(14)    | 124.9(6)  |
| C(12)-C(13)-H(13)    | 117.5     |
| C(14)-C(13)-H(13)    | 117.5     |
| O(18')-C(13A)-C(14A) | 111(3)    |
| O(18')-C(13A)-Cs(1)  | 36.8(12)  |
| C(14A)-C(13A)-Cs(1)  | 73.8(17)  |
| O(18')-C(13A)-H(13A) | 109.5     |
| C(14A)-C(13A)-H(13A) | 109.5     |
| Cs(1)-C(13A)-H(13A)  | 124.2     |
| O(18')-C(13A)-H(13B) | 109.5     |
| C(14A)-C(13A)-H(13B) | 109.5     |
| Cs(1)-C(13A)-H(13B)  | 123.5     |
| H(13A)-C(13A)-H(13B) | 108.1     |
| O(4)-C(14)-C(13)     | 122.6(6)  |
| O(4)-C(14)-C(19)     | 115.8(5)  |
| C(13)-C(14)-C(19)    | 121.6(5)  |
| N(10')-C(14A)-C(13A) | 111(2)    |
| N(10')-C(14A)-Cs(1)  | 61.0(9)   |
| C(13A)-C(14A)-Cs(1)  | 82.8(17)  |
| N(10')-C(14A)-H(14A) | 109.5     |
| C(13A)-C(14A)-H(14A) | 109.5     |
| Cs(1)-C(14A)-H(14A)  | 69.9      |
| N(10')-C(14A)-H(14B) | 109.5     |
| C(13A)-C(14A)-H(14B) | 109.5     |
| Cs(1)-C(14A)-H(14B)  | 167.1     |
| H(14A)-C(14A)-H(14B) | 108.0     |
| C(18)-C(15)-C(16)    | 106.5(15) |
| C(18)-C(15)-C(17)    | 111.8(17) |
| C(16)-C(15)-C(17)    | 106.7(13) |
| C(18)-C(15)-C(12)    | 113.0(13) |
| C(16)-C(15)-C(12)    | 108.0(12) |
| C(17)-C(15)-C(12)    | 110.4(13) |
| C(18')-C(15')-C(16') | 109.7(13) |
| C(18')-C(15')-C(17') | 110.6(14) |
| C(16')-C(15')-C(17') | 110.3(12) |
| C(18')-C(15')-C(12)  | 100.1(12) |
| C(16')-C(15')-C(12)  | 118.1(12) |
| C(17')-C(15')-C(12)  | 107.6(11) |
| N(11)-C(15A)-C(16A)  | 108(3)    |
| N(11)-C(15A)-H(15A)  | 110.1     |
| C(16A)-C(15A)-H(15A) | 110.1     |
| N(11)-C(15A)-H(15B)  | 110.1     |
| C(16A)-C(15A)-H(15B) | 110.1     |
| H(15A)-C(15A)-H(15B) | 108.4     |
| C(15)-C(16)-H(16A)   | 109.5     |
| C(15)-C(16)-H(16B)   | 109.5     |
| H(16A)-C(16)-H(16B)  | 109.5     |
| C(15)-C(16)-H(16C)   | 109.5     |
| H(16A)-C(16)-H(16C)  | 109.5     |
| H(16B)-C(16)-H(16C)  | 109.5     |

|                      |          |
|----------------------|----------|
| C(15')-C(16')-H(16D) | 109.5    |
| C(15')-C(16')-H(16E) | 109.5    |
| H(16D)-C(16')-H(16E) | 109.5    |
| C(15')-C(16')-H(16F) | 109.5    |
| H(16D)-C(16')-H(16F) | 109.5    |
| H(16E)-C(16')-H(16F) | 109.5    |
| O(19')-C(16A)-C(15A) | 123(3)   |
| O(19')-C(16A)-H(16G) | 106.7    |
| C(15A)-C(16A)-H(16G) | 106.7    |
| O(19')-C(16A)-H(16H) | 106.7    |
| C(15A)-C(16A)-H(16H) | 106.7    |
| H(16G)-C(16A)-H(16H) | 106.6    |
| C(15)-C(17)-H(17A)   | 109.5    |
| C(15)-C(17)-H(17B)   | 109.5    |
| H(17A)-C(17)-H(17B)  | 109.5    |
| C(15)-C(17)-H(17C)   | 109.5    |
| H(17A)-C(17)-H(17C)  | 109.5    |
| H(17B)-C(17)-H(17C)  | 109.5    |
| C(15')-C(17')-H(17D) | 109.5    |
| C(15')-C(17')-H(17E) | 109.5    |
| H(17D)-C(17')-H(17E) | 109.5    |
| C(15')-C(17')-H(17F) | 109.5    |
| H(17D)-C(17')-H(17F) | 109.5    |
| H(17E)-C(17')-H(17F) | 109.5    |
| C(127)-C(17A)-O(20') | 99(2)    |
| C(127)-C(17A)-H(17G) | 111.9    |
| O(20')-C(17A)-H(17G) | 111.9    |
| C(127)-C(17A)-H(17H) | 111.9    |
| O(20')-C(17A)-H(17H) | 111.9    |
| H(17G)-C(17A)-H(17H) | 109.6    |
| C(15)-C(18)-H(18A)   | 109.5    |
| C(15)-C(18)-H(18B)   | 109.5    |
| H(18A)-C(18)-H(18B)  | 109.5    |
| C(15)-C(18)-H(18C)   | 109.5    |
| H(18A)-C(18)-H(18C)  | 109.5    |
| H(18B)-C(18)-H(18C)  | 109.5    |
| C(15')-C(18')-H(18D) | 109.5    |
| C(15')-C(18')-H(18E) | 109.5    |
| H(18D)-C(18')-H(18E) | 109.5    |
| C(15')-C(18')-H(18F) | 109.5    |
| H(18D)-C(18')-H(18F) | 109.5    |
| H(18E)-C(18')-H(18F) | 109.5    |
| C(129)-C(18A)-N(12') | 114(2)   |
| C(129)-C(18A)-H(18G) | 108.7    |
| N(12')-C(18A)-H(18G) | 108.7    |
| C(129)-C(18A)-H(18H) | 108.7    |
| N(12')-C(18A)-H(18H) | 108.7    |
| H(18G)-C(18A)-H(18H) | 107.6    |
| C(21)-C(19)-C(14)    | 109.9(5) |
| C(21)-C(19)-C(22)    | 110.1(6) |
| C(14)-C(19)-C(22)    | 113.2(6) |
| C(21)-C(19)-C(20)    | 109.0(6) |
| C(14)-C(19)-C(20)    | 106.1(5) |
| C(22)-C(19)-C(20)    | 108.2(6) |
| N(11)-C(19A)-C(20A)  | 123(4)   |
| N(11)-C(19A)-Cs(2')  | 60(3)    |
| C(20A)-C(19A)-Cs(2') | 92(3)    |
| N(11)-C(19A)-H(19A)  | 106.6    |
| C(20A)-C(19A)-H(19A) | 106.6    |
| Cs(2')-C(19A)-H(19A) | 161.3    |
| N(11)-C(19A)-H(19B)  | 106.6    |
| C(20A)-C(19A)-H(19B) | 106.6    |

|                      |          |
|----------------------|----------|
| Cs(2')-C(19A)-H(19B) | 68.9     |
| H(19A)-C(19A)-H(19B) | 106.6    |
| C(19)-C(20)-H(20A)   | 109.5    |
| C(19)-C(20)-H(20B)   | 109.5    |
| H(20A)-C(20)-H(20B)  | 109.5    |
| C(19)-C(20)-H(20C)   | 109.5    |
| H(20A)-C(20)-H(20C)  | 109.5    |
| H(20B)-C(20)-H(20C)  | 109.5    |
| O(21')-C(20A)-C(19A) | 100(4)   |
| O(21')-C(20A)-H(20D) | 111.7    |
| C(19A)-C(20A)-H(20D) | 111.7    |
| O(21')-C(20A)-H(20E) | 111.7    |
| C(19A)-C(20A)-H(20E) | 111.7    |
| H(20D)-C(20A)-H(20E) | 109.5    |
| C(19)-C(21)-H(21A)   | 109.5    |
| C(19)-C(21)-H(21B)   | 109.5    |
| H(21A)-C(21)-H(21B)  | 109.5    |
| C(19)-C(21)-H(21C)   | 109.5    |
| H(21A)-C(21)-H(21C)  | 109.5    |
| H(21B)-C(21)-H(21C)  | 109.5    |
| C(22A)-C(21A)-O(21') | 117(3)   |
| C(22A)-C(21A)-H(21D) | 108.2    |
| O(21')-C(21A)-H(21D) | 108.2    |
| C(22A)-C(21A)-H(21E) | 108.2    |
| O(21')-C(21A)-H(21E) | 108.2    |
| H(21D)-C(21A)-H(21E) | 107.3    |
| C(19)-C(22)-H(22A)   | 109.5    |
| C(19)-C(22)-H(22B)   | 109.5    |
| H(22A)-C(22)-H(22B)  | 109.5    |
| C(19)-C(22)-H(22C)   | 109.5    |
| H(22A)-C(22)-H(22C)  | 109.5    |
| H(22B)-C(22)-H(22C)  | 109.5    |
| C(21A)-C(22A)-O(22') | 109(3)   |
| C(21A)-C(22A)-Cs(2') | 81(2)    |
| O(22')-C(22A)-Cs(2') | 45.4(16) |
| C(21A)-C(22A)-H(22D) | 109.9    |
| O(22')-C(22A)-H(22D) | 109.9    |
| Cs(2')-C(22A)-H(22D) | 155.2    |
| C(21A)-C(22A)-H(22E) | 109.9    |
| O(22')-C(22A)-H(22E) | 109.9    |
| Cs(2')-C(22A)-H(22E) | 87.1     |
| H(22D)-C(22A)-H(22E) | 108.3    |
| O(5)-C(23)-C(24)     | 123.9(5) |
| O(5)-C(23)-C(26)     | 114.7(5) |
| C(24)-C(23)-C(26)    | 121.4(5) |
| C(136)-C(23A)-N(12') | 122(2)   |
| C(136)-C(23A)-Cs(2') | 95.6(11) |
| N(12')-C(23A)-Cs(2') | 66.0(11) |
| C(136)-C(23A)-H(23A) | 106.7    |
| N(12')-C(23A)-H(23A) | 106.7    |
| Cs(2')-C(23A)-H(23A) | 156.3    |
| C(136)-C(23A)-H(23B) | 106.7    |
| N(12')-C(23A)-H(23B) | 106.7    |
| Cs(2')-C(23A)-H(23B) | 57.9     |
| H(23A)-C(23A)-H(23B) | 106.6    |
| C(23)-C(24)-C(25)    | 124.7(5) |
| C(23)-C(24)-H(24)    | 117.7    |
| C(25)-C(24)-H(24)    | 117.7    |
| N(11)-C(24A)-C(25A)  | 114(5)   |
| N(11)-C(24A)-Cs(2')  | 61(2)    |
| C(25A)-C(24A)-Cs(2') | 87(3)    |
| N(11)-C(24A)-H(24A)  | 108.7    |

|                      |          |
|----------------------|----------|
| C(25A)-C(24A)-H(24A) | 108.7    |
| Cs(2')-C(24A)-H(24A) | 67.9     |
| N(11)-C(24A)-H(24B)  | 108.7    |
| C(25A)-C(24A)-H(24B) | 108.7    |
| Cs(2')-C(24A)-H(24B) | 163.8    |
| H(24A)-C(24A)-H(24B) | 107.6    |
| O(6)-C(25)-C(24)     | 122.9(5) |
| O(6)-C(25)-C(30)     | 117.6(5) |
| C(24)-C(25)-C(30)    | 119.5(5) |
| O(23')-C(25A)-C(24A) | 111(3)   |
| O(23')-C(25A)-Cs(2') | 42.1(17) |
| C(24A)-C(25A)-Cs(2') | 71(3)    |
| O(23')-C(25A)-H(25A) | 109.4    |
| C(24A)-C(25A)-H(25A) | 109.4    |
| Cs(2')-C(25A)-H(25A) | 136.1    |
| O(23')-C(25A)-H(25B) | 109.4    |
| C(24A)-C(25A)-H(25B) | 109.4    |
| Cs(2')-C(25A)-H(25B) | 113.0    |
| H(25A)-C(25A)-H(25B) | 108.0    |
| C(27)-C(26)-C(29)    | 109.1(8) |
| C(27)-C(26)-C(28)    | 109.7(9) |
| C(29)-C(26)-C(28)    | 109.4(7) |
| C(27)-C(26)-C(23)    | 106.8(6) |
| C(29)-C(26)-C(23)    | 112.4(6) |
| C(28)-C(26)-C(23)    | 109.4(6) |
| O(23')-C(26A)-C(27A) | 106(3)   |
| O(23')-C(26A)-Cs(2') | 43.0(14) |
| C(27A)-C(26A)-Cs(2') | 82.3(18) |
| O(23')-C(26A)-H(26A) | 110.5    |
| C(27A)-C(26A)-H(26A) | 110.5    |
| Cs(2')-C(26A)-H(26A) | 86.8     |
| O(23')-C(26A)-H(26B) | 110.5    |
| C(27A)-C(26A)-H(26B) | 110.5    |
| Cs(2')-C(26A)-H(26B) | 153.5    |
| H(26A)-C(26A)-H(26B) | 108.7    |
| C(26)-C(27)-H(27A)   | 109.5    |
| C(26)-C(27)-H(27B)   | 109.5    |
| H(27A)-C(27)-H(27B)  | 109.5    |
| C(26)-C(27)-H(27C)   | 109.5    |
| H(27A)-C(27)-H(27C)  | 109.5    |
| H(27B)-C(27)-H(27C)  | 109.5    |
| C(26A)-C(27A)-O(24') | 112(3)   |
| C(26A)-C(27A)-H(27D) | 109.3    |
| O(24')-C(27A)-H(27D) | 109.3    |
| C(26A)-C(27A)-H(27E) | 109.3    |
| O(24')-C(27A)-H(27E) | 109.3    |
| H(27D)-C(27A)-H(27E) | 107.9    |
| C(26)-C(28)-H(28A)   | 109.5    |
| C(26)-C(28)-H(28B)   | 109.5    |
| H(28A)-C(28)-H(28B)  | 109.5    |
| C(26)-C(28)-H(28C)   | 109.5    |
| H(28A)-C(28)-H(28C)  | 109.5    |
| H(28B)-C(28)-H(28C)  | 109.5    |
| O(24')-C(28A)-C(141) | 103(2)   |
| O(24')-C(28A)-H(28D) | 111.1    |
| C(141)-C(28A)-H(28D) | 111.1    |
| O(24')-C(28A)-H(28E) | 111.1    |
| C(141)-C(28A)-H(28E) | 111.1    |
| H(28D)-C(28A)-H(28E) | 109.1    |
| C(26)-C(29)-H(29A)   | 109.5    |
| C(26)-C(29)-H(29B)   | 109.5    |
| H(29A)-C(29)-H(29B)  | 109.5    |

|                     |          |
|---------------------|----------|
| C(26)-C(29)-H(29C)  | 109.5    |
| H(29A)-C(29)-H(29C) | 109.5    |
| H(29B)-C(29)-H(29C) | 109.5    |
| C(33)-C(30)-C(31)   | 109.4(5) |
| C(33)-C(30)-C(25)   | 110.7(4) |
| C(31)-C(30)-C(25)   | 109.3(5) |
| C(33)-C(30)-C(32)   | 109.7(6) |
| C(31)-C(30)-C(32)   | 108.9(5) |
| C(25)-C(30)-C(32)   | 108.9(5) |
| C(30)-C(31)-H(31A)  | 109.5    |
| C(30)-C(31)-H(31B)  | 109.5    |
| H(31A)-C(31)-H(31B) | 109.5    |
| C(30)-C(31)-H(31C)  | 109.5    |
| H(31A)-C(31)-H(31C) | 109.5    |
| H(31B)-C(31)-H(31C) | 109.5    |
| C(30)-C(32)-H(32A)  | 109.5    |
| C(30)-C(32)-H(32B)  | 109.5    |
| H(32A)-C(32)-H(32B) | 109.5    |
| C(30)-C(32)-H(32C)  | 109.5    |
| H(32A)-C(32)-H(32C) | 109.5    |
| H(32B)-C(32)-H(32C) | 109.5    |
| C(30)-C(33)-H(33A)  | 109.5    |
| C(30)-C(33)-H(33B)  | 109.5    |
| H(33A)-C(33)-H(33B) | 109.5    |
| C(30)-C(33)-H(33C)  | 109.5    |
| H(33A)-C(33)-H(33C) | 109.5    |
| H(33B)-C(33)-H(33C) | 109.5    |
| N(1)-C(34)-C(35)    | 123.6(5) |
| N(1)-C(34)-H(34)    | 118.2    |
| C(35)-C(34)-H(34)   | 118.2    |
| C(36)-C(35)-C(34)   | 120.4(5) |
| C(36)-C(35)-H(35)   | 119.8    |
| C(34)-C(35)-H(35)   | 119.8    |
| C(35)-C(36)-C(37)   | 116.5(5) |
| C(35)-C(36)-C(39)   | 121.9(5) |
| C(37)-C(36)-C(39)   | 121.6(5) |
| C(36)-C(37)-C(38)   | 120.5(5) |
| C(36)-C(37)-H(37)   | 119.8    |
| C(38)-C(37)-H(37)   | 119.8    |
| N(1)-C(38)-C(37)    | 122.0(5) |
| N(1)-C(38)-H(38)    | 119.0    |
| C(37)-C(38)-H(38)   | 119.0    |
| C(73)-C(39)-C(40)   | 127.9(5) |
| C(73)-C(39)-C(36)   | 116.6(4) |
| C(40)-C(39)-C(36)   | 115.5(4) |
| C(73)-C(39)-Cs(1)   | 89.9(3)  |
| C(40)-C(39)-Cs(1)   | 60.4(3)  |
| C(36)-C(39)-Cs(1)   | 121.5(3) |
| N(5)-C(40)-C(41)    | 111.0(4) |
| N(5)-C(40)-C(39)    | 125.2(4) |
| C(41)-C(40)-C(39)   | 123.8(5) |
| N(5)-C(40)-Cs(1)    | 74.5(3)  |
| C(41)-C(40)-Cs(1)   | 95.2(3)  |
| C(39)-C(40)-Cs(1)   | 96.9(3)  |
| C(42)-C(41)-C(40)   | 106.2(5) |
| C(42)-C(41)-Cs(1)   | 85.0(4)  |
| C(40)-C(41)-Cs(1)   | 62.4(3)  |
| C(42)-C(41)-H(41)   | 126.9    |
| C(40)-C(41)-H(41)   | 126.9    |
| Cs(1)-C(41)-H(41)   | 117.3    |
| C(41)-C(42)-C(43)   | 107.0(5) |
| C(41)-C(42)-Cs(1)   | 73.8(4)  |

|                    |          |
|--------------------|----------|
| C(43)-C(42)-Cs(1)  | 68.4(3)  |
| C(41)-C(42)-H(42)  | 126.5    |
| C(43)-C(42)-H(42)  | 126.5    |
| Cs(1)-C(42)-H(42)  | 122.9    |
| N(5)-C(43)-C(42)   | 110.2(4) |
| N(5)-C(43)-C(44)   | 125.1(4) |
| C(42)-C(43)-C(44)  | 124.7(5) |
| N(5)-C(43)-Cs(1)   | 64.0(3)  |
| C(42)-C(43)-Cs(1)  | 90.0(4)  |
| C(44)-C(43)-Cs(1)  | 113.2(3) |
| C(50)-C(44)-C(43)  | 124.6(5) |
| C(50)-C(44)-C(45)  | 117.0(5) |
| C(43)-C(44)-C(45)  | 118.3(4) |
| C(48)-C(45)-C(46)  | 115.4(5) |
| C(48)-C(45)-C(44)  | 122.8(4) |
| C(46)-C(45)-C(44)  | 121.8(4) |
| C(47)-C(46)-C(45)  | 120.7(5) |
| C(47)-C(46)-H(46)  | 119.7    |
| C(45)-C(46)-H(46)  | 119.7    |
| N(6)-C(47)-C(46)   | 123.8(5) |
| N(6)-C(47)-H(47)   | 118.1    |
| C(46)-C(47)-H(47)  | 118.1    |
| C(49)-C(48)-C(45)  | 120.2(5) |
| C(49)-C(48)-H(48)  | 119.9    |
| C(45)-C(48)-H(48)  | 119.9    |
| N(6)-C(49)-C(48)   | 124.2(5) |
| N(6)-C(49)-H(49)   | 117.9    |
| C(48)-C(49)-H(49)  | 117.9    |
| C(44)-C(50)-N(4)   | 125.3(5) |
| C(44)-C(50)-C(51)  | 129.1(5) |
| N(4)-C(50)-C(51)   | 105.5(4) |
| C(52)-C(51)-C(50)  | 108.9(5) |
| C(52)-C(51)-H(51)  | 125.5    |
| C(50)-C(51)-H(51)  | 125.5    |
| C(51)-C(52)-C(53)  | 109.4(5) |
| C(51)-C(52)-H(52)  | 125.3    |
| C(53)-C(52)-H(52)  | 125.3    |
| C(54)-C(53)-N(4)   | 126.8(5) |
| C(54)-C(53)-C(52)  | 127.7(5) |
| N(4)-C(53)-C(52)   | 105.5(4) |
| C(54)-C(53)-Cs(2)  | 85.5(3)  |
| N(4)-C(53)-Cs(2)   | 72.7(3)  |
| C(52)-C(53)-Cs(2)  | 111.1(3) |
| C(54)-C(53)-Cs(2') | 88.0(3)  |
| N(4)-C(53)-Cs(2')  | 64.9(3)  |
| C(52)-C(53)-Cs(2') | 115.8(3) |
| C(53)-C(54)-C(60)  | 126.9(5) |
| C(53)-C(54)-C(55)  | 117.4(5) |
| C(60)-C(54)-C(55)  | 115.6(4) |
| C(53)-C(54)-Cs(2)  | 72.7(3)  |
| C(60)-C(54)-Cs(2)  | 79.6(3)  |
| C(55)-C(54)-Cs(2)  | 126.3(3) |
| C(53)-C(54)-Cs(2') | 71.4(3)  |
| C(60)-C(54)-Cs(2') | 75.1(3)  |
| C(55)-C(54)-Cs(2') | 134.0(3) |
| C(56)-C(55)-C(58)  | 116.0(5) |
| C(56)-C(55)-C(54)  | 123.8(5) |
| C(58)-C(55)-C(54)  | 120.2(5) |
| C(57)-C(56)-C(55)  | 120.8(5) |
| C(57)-C(56)-H(56)  | 119.6    |
| C(55)-C(56)-H(56)  | 119.6    |
| N(7)-C(57)-C(56)   | 123.4(5) |

|                    |          |
|--------------------|----------|
| N(7)-C(57)-H(57)   | 118.3    |
| C(56)-C(57)-H(57)  | 118.3    |
| C(59)-C(58)-C(55)  | 119.8(5) |
| C(59)-C(58)-H(58)  | 120.1    |
| C(55)-C(58)-H(58)  | 120.1    |
| N(7)-C(59)-C(58)   | 123.5(5) |
| N(7)-C(59)-H(59)   | 118.3    |
| C(58)-C(59)-H(59)  | 118.3    |
| N(3)-C(60)-C(61)   | 111.3(5) |
| N(3)-C(60)-C(54)   | 125.1(4) |
| C(61)-C(60)-C(54)  | 123.6(5) |
| N(3)-C(60)-Cs(2)   | 62.0(3)  |
| C(61)-C(60)-Cs(2)  | 137.4(3) |
| C(54)-C(60)-Cs(2)  | 77.8(3)  |
| N(3)-C(60)-Cs(2')  | 53.7(3)  |
| C(61)-C(60)-Cs(2') | 138.7(3) |
| C(54)-C(60)-Cs(2') | 83.3(3)  |
| C(62)-C(61)-C(60)  | 106.7(5) |
| C(62)-C(61)-H(61)  | 126.6    |
| C(60)-C(61)-H(61)  | 126.6    |
| C(61)-C(62)-C(63)  | 106.4(5) |
| C(61)-C(62)-H(62)  | 126.8    |
| C(63)-C(62)-H(62)  | 126.8    |
| N(3)-C(63)-C(62)   | 111.1(5) |
| N(3)-C(63)-C(64)   | 125.3(4) |
| C(62)-C(63)-C(64)  | 123.6(5) |
| C(70)-C(64)-C(63)  | 124.7(5) |
| C(70)-C(64)-C(65)  | 119.3(5) |
| C(63)-C(64)-C(65)  | 116.0(4) |
| C(68)-C(65)-C(66)  | 116.6(5) |
| C(68)-C(65)-C(64)  | 122.9(5) |
| C(66)-C(65)-C(64)  | 120.3(5) |
| C(67)-C(66)-C(65)  | 119.4(5) |
| C(67)-C(66)-H(66)  | 120.3    |
| C(65)-C(66)-H(66)  | 120.3    |
| N(8)-C(67)-C(66)   | 124.1(5) |
| N(8)-C(67)-H(67)   | 118.0    |
| C(66)-C(67)-H(67)  | 118.0    |
| C(65)-C(68)-C(69)  | 120.1(5) |
| C(65)-C(68)-H(68)  | 120.0    |
| C(69)-C(68)-H(68)  | 120.0    |
| N(8)-C(69)-C(68)   | 122.4(5) |
| N(8)-C(69)-H(69)   | 118.8    |
| C(68)-C(69)-H(69)  | 118.8    |
| N(2)-C(70)-C(64)   | 124.6(5) |
| N(2)-C(70)-C(71)   | 106.9(4) |
| C(64)-C(70)-C(71)  | 128.5(5) |
| C(72)-C(71)-C(70)  | 107.8(5) |
| C(72)-C(71)-H(71)  | 126.1    |
| C(70)-C(71)-H(71)  | 126.1    |
| C(71)-C(72)-C(73)  | 109.5(5) |
| C(71)-C(72)-H(72)  | 125.3    |
| C(73)-C(72)-H(72)  | 125.3    |
| C(39)-C(73)-N(2)   | 127.0(5) |
| C(39)-C(73)-C(72)  | 127.6(5) |
| N(2)-C(73)-C(72)   | 105.3(4) |
| O(7)-C(74)-C(75)   | 123.2(6) |
| O(7)-C(74)-C(77)   | 116.3(6) |
| C(75)-C(74)-C(77)  | 120.5(6) |
| C(76)-C(75)-C(74)  | 124.1(5) |
| C(76)-C(75)-H(75)  | 118.0    |
| C(74)-C(75)-H(75)  | 118.0    |

|                     |          |
|---------------------|----------|
| O(8)-C(76)-C(75)    | 123.5(6) |
| O(8)-C(76)-C(81)    | 113.7(6) |
| C(75)-C(76)-C(81)   | 122.8(5) |
| C(78)-C(77)-C(80)   | 110.4(6) |
| C(78)-C(77)-C(74)   | 114.2(7) |
| C(80)-C(77)-C(74)   | 107.3(6) |
| C(78)-C(77)-C(79)   | 108.6(7) |
| C(80)-C(77)-C(79)   | 108.7(7) |
| C(74)-C(77)-C(79)   | 107.5(6) |
| C(77)-C(78)-H(78A)  | 109.5    |
| C(77)-C(78)-H(78B)  | 109.5    |
| H(78A)-C(78)-H(78B) | 109.5    |
| C(77)-C(78)-H(78C)  | 109.5    |
| H(78A)-C(78)-H(78C) | 109.5    |
| H(78B)-C(78)-H(78C) | 109.5    |
| C(77)-C(79)-H(79A)  | 109.5    |
| C(77)-C(79)-H(79B)  | 109.5    |
| H(79A)-C(79)-H(79B) | 109.5    |
| C(77)-C(79)-H(79C)  | 109.5    |
| H(79A)-C(79)-H(79C) | 109.5    |
| H(79B)-C(79)-H(79C) | 109.5    |
| C(77)-C(80)-H(80A)  | 109.5    |
| C(77)-C(80)-H(80B)  | 109.5    |
| H(80A)-C(80)-H(80B) | 109.5    |
| C(77)-C(80)-H(80C)  | 109.5    |
| H(80A)-C(80)-H(80C) | 109.5    |
| H(80B)-C(80)-H(80C) | 109.5    |
| C(82)-C(81)-C(83)   | 110.7(6) |
| C(82)-C(81)-C(84)   | 110.2(7) |
| C(83)-C(81)-C(84)   | 108.4(7) |
| C(82)-C(81)-C(76)   | 112.6(7) |
| C(83)-C(81)-C(76)   | 107.4(5) |
| C(84)-C(81)-C(76)   | 107.4(5) |
| C(81)-C(82)-H(82A)  | 109.5    |
| C(81)-C(82)-H(82B)  | 109.5    |
| H(82A)-C(82)-H(82B) | 109.5    |
| C(81)-C(82)-H(82C)  | 109.5    |
| H(82A)-C(82)-H(82C) | 109.5    |
| H(82B)-C(82)-H(82C) | 109.5    |
| C(81)-C(83)-H(83A)  | 109.5    |
| C(81)-C(83)-H(83B)  | 109.5    |
| H(83A)-C(83)-H(83B) | 109.5    |
| C(81)-C(83)-H(83C)  | 109.5    |
| H(83A)-C(83)-H(83C) | 109.5    |
| H(83B)-C(83)-H(83C) | 109.5    |
| C(81)-C(84)-H(84A)  | 109.5    |
| C(81)-C(84)-H(84B)  | 109.5    |
| H(84A)-C(84)-H(84B) | 109.5    |
| C(81)-C(84)-H(84C)  | 109.5    |
| H(84A)-C(84)-H(84C) | 109.5    |
| H(84B)-C(84)-H(84C) | 109.5    |
| O(9)-C(85)-C(86)    | 123.3(6) |
| O(9)-C(85)-C(88)    | 115.5(6) |
| C(86)-C(85)-C(88)   | 121.2(5) |
| C(87)-C(86)-C(85)   | 124.8(6) |
| C(87)-C(86)-H(86)   | 117.6    |
| C(85)-C(86)-H(86)   | 117.6    |
| O(10)-C(87)-C(86)   | 123.3(6) |
| O(10)-C(87)-C(92)   | 113.4(6) |
| C(86)-C(87)-C(92)   | 123.3(6) |
| C(90)-C(88)-C(91)   | 112.6(8) |
| C(90)-C(88)-C(89)   | 108.8(8) |

|                     |          |
|---------------------|----------|
| C(91)-C(88)-C(89)   | 106.6(8) |
| C(90)-C(88)-C(85)   | 108.0(6) |
| C(91)-C(88)-C(85)   | 110.6(6) |
| C(89)-C(88)-C(85)   | 110.2(6) |
| C(88)-C(89)-H(89A)  | 109.5    |
| C(88)-C(89)-H(89B)  | 109.5    |
| H(89A)-C(89)-H(89B) | 109.5    |
| C(88)-C(89)-H(89C)  | 109.5    |
| H(89A)-C(89)-H(89C) | 109.5    |
| H(89B)-C(89)-H(89C) | 109.5    |
| C(88)-C(90)-H(90A)  | 109.5    |
| C(88)-C(90)-H(90B)  | 109.5    |
| H(90A)-C(90)-H(90B) | 109.5    |
| C(88)-C(90)-H(90C)  | 109.5    |
| H(90A)-C(90)-H(90C) | 109.5    |
| H(90B)-C(90)-H(90C) | 109.5    |
| C(88)-C(91)-H(91A)  | 109.5    |
| C(88)-C(91)-H(91B)  | 109.5    |
| H(91A)-C(91)-H(91B) | 109.5    |
| C(88)-C(91)-H(91C)  | 109.5    |
| H(91A)-C(91)-H(91C) | 109.5    |
| H(91B)-C(91)-H(91C) | 109.5    |
| C(93)-C(92)-C(95)   | 109.0(6) |
| C(93)-C(92)-C(94)   | 110.0(6) |
| C(95)-C(92)-C(94)   | 109.5(6) |
| C(93)-C(92)-C(87)   | 112.9(6) |
| C(95)-C(92)-C(87)   | 106.5(5) |
| C(94)-C(92)-C(87)   | 108.8(5) |
| C(92)-C(93)-H(93A)  | 109.5    |
| C(92)-C(93)-H(93B)  | 109.5    |
| H(93A)-C(93)-H(93B) | 109.5    |
| C(92)-C(93)-H(93C)  | 109.5    |
| H(93A)-C(93)-H(93C) | 109.5    |
| H(93B)-C(93)-H(93C) | 109.5    |
| C(92)-C(94)-H(94A)  | 109.5    |
| C(92)-C(94)-H(94B)  | 109.5    |
| H(94A)-C(94)-H(94B) | 109.5    |
| C(92)-C(94)-H(94C)  | 109.5    |
| H(94A)-C(94)-H(94C) | 109.5    |
| H(94B)-C(94)-H(94C) | 109.5    |
| C(92)-C(95)-H(95A)  | 109.5    |
| C(92)-C(95)-H(95B)  | 109.5    |
| H(95A)-C(95)-H(95B) | 109.5    |
| C(92)-C(95)-H(95C)  | 109.5    |
| H(95A)-C(95)-H(95C) | 109.5    |
| H(95B)-C(95)-H(95C) | 109.5    |
| O(11)-C(96)-C(97)   | 124.2(5) |
| O(11)-C(96)-C(99)   | 114.6(5) |
| C(97)-C(96)-C(99)   | 121.1(5) |
| C(98)-C(97)-C(96)   | 124.0(5) |
| C(98)-C(97)-H(97)   | 118.0    |
| C(96)-C(97)-H(97)   | 118.0    |
| O(12)-C(98)-C(97)   | 125.4(5) |
| O(12)-C(98)-C(103)  | 113.3(5) |
| C(97)-C(98)-C(103)  | 121.4(5) |
| C(100)-C(99)-C(102) | 109.3(6) |
| C(100)-C(99)-C(101) | 111.3(7) |
| C(102)-C(99)-C(101) | 108.8(6) |
| C(100)-C(99)-C(96)  | 108.0(5) |
| C(102)-C(99)-C(96)  | 114.0(5) |
| C(101)-C(99)-C(96)  | 105.4(5) |
| C(99)-C(100)-H(10F) | 109.5    |

|                      |           |
|----------------------|-----------|
| C(99)-C(100)-H(10G)  | 109.5     |
| H(10F)-C(100)-H(10G) | 109.5     |
| C(99)-C(100)-H(10H)  | 109.5     |
| H(10F)-C(100)-H(10H) | 109.5     |
| H(10G)-C(100)-H(10H) | 109.5     |
| C(99)-C(101)-H(10I)  | 109.5     |
| C(99)-C(101)-H(10J)  | 109.5     |
| H(10I)-C(101)-H(10J) | 109.5     |
| C(99)-C(101)-H(10K)  | 109.5     |
| H(10I)-C(101)-H(10K) | 109.5     |
| H(10J)-C(101)-H(10K) | 109.5     |
| C(99)-C(102)-H(10L)  | 109.5     |
| C(99)-C(102)-H(10M)  | 109.5     |
| H(10L)-C(102)-H(10M) | 109.5     |
| C(99)-C(102)-H(10N)  | 109.5     |
| H(10L)-C(102)-H(10N) | 109.5     |
| H(10M)-C(102)-H(10N) | 109.5     |
| C(106)-C(103)-C(98)  | 108.3(5)  |
| C(106)-C(103)-C(104) | 107.5(6)  |
| C(98)-C(103)-C(104)  | 114.0(5)  |
| C(106)-C(103)-C(105) | 110.3(7)  |
| C(98)-C(103)-C(105)  | 107.8(5)  |
| C(104)-C(103)-C(105) | 108.9(6)  |
| C(103)-C(104)-H(10O) | 109.5     |
| C(103)-C(104)-H(10P) | 109.5     |
| H(10O)-C(104)-H(10P) | 109.5     |
| C(103)-C(104)-H(10Q) | 109.5     |
| H(10O)-C(104)-H(10Q) | 109.5     |
| H(10P)-C(104)-H(10Q) | 109.5     |
| C(103)-C(105)-H(10R) | 109.5     |
| C(103)-C(105)-H(10S) | 109.5     |
| H(10R)-C(105)-H(10S) | 109.5     |
| C(103)-C(105)-H(10T) | 109.5     |
| H(10R)-C(105)-H(10T) | 109.5     |
| H(10S)-C(105)-H(10T) | 109.5     |
| C(103)-C(106)-H(10U) | 109.5     |
| C(103)-C(106)-H(10V) | 109.5     |
| H(10U)-C(106)-H(10V) | 109.5     |
| C(103)-C(106)-H(10W) | 109.5     |
| H(10U)-C(106)-H(10W) | 109.5     |
| H(10V)-C(106)-H(10W) | 109.5     |
| N(9)-C(107)-C(108)   | 109.9(15) |
| N(9)-C(107)-Cs(1)    | 62.2(10)  |
| C(108)-C(107)-Cs(1)  | 84.8(10)  |
| N(9)-C(107)-H(10X)   | 109.7     |
| C(108)-C(107)-H(10X) | 109.7     |
| Cs(1)-C(107)-H(10X)  | 66.5      |
| N(9)-C(107)-H(10Y)   | 109.7     |
| C(108)-C(107)-H(10Y) | 109.7     |
| Cs(1)-C(107)-H(10Y)  | 165.4     |
| H(10X)-C(107)-H(10Y) | 108.2     |
| O(13)-C(108)-C(107)  | 106.2(15) |
| O(13)-C(108)-H       | 110.5     |
| C(107)-C(108)-H      | 110.5     |
| O(13)-C(108)-H(10Z)  | 110.5     |
| C(107)-C(108)-H(10Z) | 110.5     |
| H-C(108)-H(10Z)      | 108.7     |
| O(13)-C(109)-C(110)  | 103.6(15) |
| O(13)-C(109)-Cs(1)   | 41.1(7)   |
| C(110)-C(109)-Cs(1)  | 66.6(9)   |
| O(13)-C(109)-H(10)   | 111.0     |
| C(110)-C(109)-H(10)  | 111.0     |

|                      |           |
|----------------------|-----------|
| Cs(1)-C(109)-H(10)   | 140.8     |
| O(13)-C(109)-HA      | 111.0     |
| C(110)-C(109)-HA     | 111.0     |
| Cs(1)-C(109)-HA      | 107.8     |
| H(10)-C(109)-HA      | 109.0     |
| O(14)-C(110)-C(109)  | 105.4(14) |
| O(14)-C(110)-Cs(1)   | 59.2(8)   |
| C(109)-C(110)-Cs(1)  | 89.7(10)  |
| O(14)-C(110)-H(11F)  | 110.7     |
| C(109)-C(110)-H(11F) | 110.7     |
| Cs(1)-C(110)-H(11F)  | 159.5     |
| O(14)-C(110)-H(11G)  | 110.7     |
| C(109)-C(110)-H(11G) | 110.7     |
| Cs(1)-C(110)-H(11G)  | 63.9      |
| H(11F)-C(110)-H(11G) | 108.8     |
| C(112)-C(111)-O(14)  | 109.8(13) |
| C(112)-C(111)-Cs(1)  | 98.2(10)  |
| O(14)-C(111)-Cs(1)   | 60.5(7)   |
| C(112)-C(111)-H(11H) | 109.7     |
| O(14)-C(111)-H(11H)  | 109.7     |
| Cs(1)-C(111)-H(11H)  | 152.0     |
| C(112)-C(111)-H(11I) | 109.7     |
| O(14)-C(111)-H(11I)  | 109.7     |
| Cs(1)-C(111)-H(11I)  | 58.2      |
| H(11H)-C(111)-H(11I) | 108.2     |
| C(111)-C(112)-N(10)  | 116.0(13) |
| C(111)-C(112)-H(11J) | 108.3     |
| N(10)-C(112)-H(11J)  | 108.3     |
| C(111)-C(112)-H(11K) | 108.3     |
| N(10)-C(112)-H(11K)  | 108.3     |
| H(11J)-C(112)-H(11K) | 107.4     |
| N(9)-C(113)-C(114)   | 117.0(14) |
| N(9)-C(113)-H(11L)   | 108.0     |
| C(114)-C(113)-H(11L) | 108.0     |
| N(9)-C(113)-H(11M)   | 108.0     |
| C(114)-C(113)-H(11M) | 108.0     |
| H(11L)-C(113)-H(11M) | 107.3     |
| O(15)-C(114)-C(113)  | 118.5(12) |
| O(15)-C(114)-C(7A)   | 94.6(11)  |
| O(15)-C(114)-H(11N)  | 107.7     |
| C(113)-C(114)-H(11N) | 107.7     |
| O(15)-C(114)-H(11O)  | 107.7     |
| C(113)-C(114)-H(11O) | 107.7     |
| H(11N)-C(114)-H(11O) | 107.1     |
| O(15)-C(114)-H(11P)  | 112.8     |
| C(7A)-C(114)-H(11P)  | 112.8     |
| O(15)-C(114)-H(11Q)  | 112.8     |
| C(7A)-C(114)-H(11Q)  | 112.8     |
| H(11P)-C(114)-H(11Q) | 110.3     |
| O(15)-C(115)-C(116)  | 117.4(6)  |
| O(15)-C(115)-H(11R)  | 107.9     |
| C(116)-C(115)-H(11R) | 107.9     |
| O(15)-C(115)-H(11S)  | 107.9     |
| C(116)-C(115)-H(11S) | 107.9     |
| H(11R)-C(115)-H(11S) | 107.2     |
| O(16)-C(116)-C(115)  | 116.5(7)  |
| O(16)-C(116)-H(11T)  | 108.2     |
| C(115)-C(116)-H(11T) | 108.2     |
| O(16)-C(116)-H(11U)  | 108.2     |
| C(115)-C(116)-H(11U) | 108.2     |
| H(11T)-C(116)-H(11U) | 107.3     |
| O(16)-C(117)-C(8A)   | 115.1(13) |

|                      |           |
|----------------------|-----------|
| O(16)-C(117)-C(118)  | 103.3(10) |
| O(16)-C(117)-H(11V)  | 111.1     |
| C(118)-C(117)-H(11V) | 111.1     |
| O(16)-C(117)-H(11W)  | 111.1     |
| C(118)-C(117)-H(11W) | 111.1     |
| H(11V)-C(117)-H(11W) | 109.1     |
| O(16)-C(117)-H(11X)  | 108.5     |
| C(8A)-C(117)-H(11X)  | 108.5     |
| O(16)-C(117)-H(11Y)  | 108.5     |
| C(8A)-C(117)-H(11Y)  | 108.5     |
| H(11X)-C(117)-H(11Y) | 107.5     |
| N(10)-C(118)-C(117)  | 107.6(15) |
| N(10)-C(118)-H(11Z)  | 110.2     |
| C(117)-C(118)-H(11Z) | 110.2     |
| N(10)-C(118)-HB      | 110.2     |
| C(117)-C(118)-HB     | 110.2     |
| H(11Z)-C(118)-HB     | 108.5     |
| N(9)-C(119)-C(120)   | 113.7(17) |
| N(9)-C(119)-Cs(1)    | 64.8(8)   |
| C(120)-C(119)-Cs(1)  | 89.9(11)  |
| N(9)-C(119)-H(11)    | 108.8     |
| C(120)-C(119)-H(11)  | 108.8     |
| Cs(1)-C(119)-H(11)   | 160.9     |
| N(9)-C(119)-HC       | 108.8     |
| C(120)-C(119)-HC     | 108.8     |
| Cs(1)-C(119)-HC      | 61.1      |
| H(11)-C(119)-HC      | 107.7     |
| O(17)-C(120)-C(119)  | 106.9(13) |
| O(17)-C(120)-H(12C)  | 110.3     |
| C(119)-C(120)-H(12C) | 110.3     |
| O(17)-C(120)-H(12D)  | 110.3     |
| C(119)-C(120)-H(12D) | 110.3     |
| H(12C)-C(120)-H(12D) | 108.6     |
| O(17)-C(121)-C(122)  | 108.3(14) |
| O(17)-C(121)-Cs(1)   | 41.9(7)   |
| C(122)-C(121)-Cs(1)  | 76.6(10)  |
| O(17)-C(121)-H(12E)  | 110.0     |
| C(122)-C(121)-H(12E) | 110.0     |
| Cs(1)-C(121)-H(12E)  | 96.9      |
| O(17)-C(121)-H(12F)  | 110.0     |
| C(122)-C(121)-H(12F) | 110.0     |
| Cs(1)-C(121)-H(12F)  | 148.8     |
| H(12E)-C(121)-H(12F) | 108.4     |
| O(18)-C(122)-C(121)  | 105.3(16) |
| O(18)-C(122)-Cs(1)   | 47.4(8)   |
| C(121)-C(122)-Cs(1)  | 81.1(10)  |
| O(18)-C(122)-H(12G)  | 110.7     |
| C(121)-C(122)-H(12G) | 110.7     |
| Cs(1)-C(122)-H(12G)  | 82.6      |
| O(18)-C(122)-H(12H)  | 110.7     |
| C(121)-C(122)-H(12H) | 110.7     |
| Cs(1)-C(122)-H(12H)  | 158.0     |
| H(12G)-C(122)-H(12H) | 108.8     |
| O(18)-C(123)-C(124)  | 112.9(19) |
| O(18)-C(123)-Cs(1)   | 43.8(8)   |
| C(124)-C(123)-Cs(1)  | 73.9(14)  |
| O(18)-C(123)-H(12I)  | 109.0     |
| C(124)-C(123)-H(12I) | 109.0     |
| Cs(1)-C(123)-H(12I)  | 143.3     |
| O(18)-C(123)-H(12J)  | 109.0     |
| C(124)-C(123)-H(12J) | 109.0     |
| Cs(1)-C(123)-H(12J)  | 105.4     |

|                      |           |
|----------------------|-----------|
| H(12I)-C(123)-H(12J) | 107.8     |
| C(123)-C(124)-N(10)  | 113.6(18) |
| C(123)-C(124)-Cs(1)  | 83.7(14)  |
| N(10)-C(124)-Cs(1)   | 64.4(11)  |
| C(123)-C(124)-H(12K) | 108.8     |
| N(10)-C(124)-H(12K)  | 108.8     |
| Cs(1)-C(124)-H(12K)  | 167.4     |
| C(123)-C(124)-H(12L) | 108.8     |
| N(10)-C(124)-H(12L)  | 108.8     |
| Cs(1)-C(124)-H(12L)  | 66.9      |
| H(12K)-C(124)-H(12L) | 107.7     |
| N(11)-C(125)-C(126)  | 103.4(11) |
| N(11)-C(125)-H(12M)  | 111.1     |
| C(126)-C(125)-H(12M) | 111.1     |
| N(11)-C(125)-H(12N)  | 111.1     |
| C(126)-C(125)-H(12N) | 111.1     |
| H(12M)-C(125)-H(12N) | 109.0     |
| O(19)-C(126)-C(125)  | 109.3(14) |
| O(19)-C(126)-Cs(2)   | 156.5(10) |
| C(125)-C(126)-Cs(2)  | 94.0(9)   |
| O(19)-C(126)-H(12O)  | 109.8     |
| C(125)-C(126)-H(12O) | 109.8     |
| Cs(2)-C(126)-H(12O)  | 62.2      |
| O(19)-C(126)-H(12P)  | 109.8     |
| C(125)-C(126)-H(12P) | 109.8     |
| Cs(2)-C(126)-H(12P)  | 57.7      |
| H(12O)-C(126)-H(12P) | 108.3     |
| O(19)-C(127)-C(128)  | 113.3(12) |
| C(17A)-C(127)-O(19') | 108(3)    |
| C(17A)-C(127)-H(12S) | 110.1     |
| O(19')-C(127)-H(12S) | 110.1     |
| C(17A)-C(127)-H(12T) | 110.1     |
| O(19')-C(127)-H(12T) | 110.1     |
| H(12S)-C(127)-H(12T) | 108.4     |
| O(19)-C(127)-H(12Q)  | 108.9     |
| C(128)-C(127)-H(12Q) | 108.9     |
| O(19)-C(127)-H(12R)  | 108.9     |
| C(128)-C(127)-H(12R) | 108.9     |
| H(12Q)-C(127)-H(12R) | 107.7     |
| C(127)-C(128)-O(20)  | 117.4(10) |
| C(127)-C(128)-H(12U) | 108.0     |
| O(20)-C(128)-H(12U)  | 108.0     |
| C(127)-C(128)-H(12V) | 108.0     |
| O(20)-C(128)-H(12V)  | 108.0     |
| H(12U)-C(128)-H(12V) | 107.2     |
| O(20')-C(129)-C(18A) | 118(2)    |
| O(20)-C(129)-C(130)  | 110.5(7)  |
| O(20)-C(129)-H(12W)  | 109.5     |
| C(130)-C(129)-H(12W) | 109.5     |
| O(20)-C(129)-H(12X)  | 109.5     |
| C(130)-C(129)-H(12X) | 109.5     |
| H(12W)-C(129)-H(12X) | 108.1     |
| O(20')-C(129)-H(12Y) | 107.9     |
| C(18A)-C(129)-H(12Y) | 107.9     |
| O(20')-C(129)-HD     | 107.9     |
| C(18A)-C(129)-HD     | 107.9     |
| H(12Y)-C(129)-HD     | 107.2     |
| N(12)-C(130)-C(129)  | 114.3(8)  |
| N(12)-C(130)-H(13C)  | 108.7     |
| C(129)-C(130)-H(13C) | 108.7     |
| N(12)-C(130)-H(13D)  | 108.7     |
| C(129)-C(130)-H(13D) | 108.7     |

|                      |           |
|----------------------|-----------|
| H(13C)-C(130)-H(13D) | 107.6     |
| C(132)-C(131)-N(11)  | 111.2(10) |
| C(132)-C(131)-Cs(2)  | 88.7(11)  |
| N(11)-C(131)-Cs(2)   | 63.3(9)   |
| C(132)-C(131)-H(13E) | 109.4     |
| N(11)-C(131)-H(13E)  | 109.4     |
| Cs(2)-C(131)-H(13E)  | 62.6      |
| C(132)-C(131)-H(13F) | 109.4     |
| N(11)-C(131)-H(13F)  | 109.4     |
| Cs(2)-C(131)-H(13F)  | 161.8     |
| H(13E)-C(131)-H(13F) | 108.0     |
| C(131)-C(132)-O(21)  | 113.5(13) |
| C(131)-C(132)-Cs(2)  | 69.1(10)  |
| O(21)-C(132)-Cs(2)   | 44.5(6)   |
| C(131)-C(132)-H(13G) | 108.9     |
| O(21)-C(132)-H(13G)  | 108.9     |
| Cs(2)-C(132)-H(13G)  | 127.9     |
| C(131)-C(132)-H(13H) | 108.9     |
| O(21)-C(132)-H(13H)  | 108.9     |
| Cs(2)-C(132)-H(13H)  | 122.5     |
| H(13G)-C(132)-H(13H) | 107.7     |
| O(21)-C(133)-C(134)  | 109.1(10) |
| O(21)-C(133)-H(13I)  | 109.9     |
| C(134)-C(133)-H(13I) | 109.9     |
| O(21)-C(133)-H(13J)  | 109.9     |
| C(134)-C(133)-H(13J) | 109.9     |
| H(13I)-C(133)-H(13J) | 108.3     |
| O(22)-C(134)-C(133)  | 111.4(9)  |
| O(22)-C(134)-H(13K)  | 109.3     |
| C(133)-C(134)-H(13K) | 109.3     |
| O(22)-C(134)-H(13L)  | 109.3     |
| C(133)-C(134)-H(13L) | 109.3     |
| H(13K)-C(134)-H(13L) | 108.0     |
| O(22)-C(135)-C(136)  | 107.7(8)  |
| O(22)-C(135)-H(13M)  | 110.2     |
| C(136)-C(135)-H(13M) | 110.2     |
| O(22)-C(135)-H(13N)  | 110.2     |
| C(136)-C(135)-H(13N) | 110.2     |
| H(13M)-C(135)-H(13N) | 108.5     |
| C(135)-C(136)-N(12)  | 116.2(6)  |
| C(23A)-C(136)-O(22') | 105.2(13) |
| C(135)-C(136)-Cs(2)  | 91.3(5)   |
| N(12)-C(136)-Cs(2)   | 62.3(4)   |
| C(135)-C(136)-H(13O) | 108.2     |
| N(12)-C(136)-H(13O)  | 108.2     |
| Cs(2)-C(136)-H(13O)  | 160.4     |
| C(135)-C(136)-H(13P) | 108.2     |
| N(12)-C(136)-H(13P)  | 108.2     |
| Cs(2)-C(136)-H(13P)  | 63.5      |
| H(13O)-C(136)-H(13P) | 107.4     |
| C(23A)-C(136)-H(13Q) | 110.7     |
| O(22')-C(136)-H(13Q) | 110.7     |
| C(23A)-C(136)-H(13R) | 110.7     |
| O(22')-C(136)-H(13R) | 110.7     |
| H(13Q)-C(136)-H(13R) | 108.8     |
| C(138)-C(137)-N(11)  | 112.7(15) |
| C(138)-C(137)-Cs(2)  | 86.0(10)  |
| N(11)-C(137)-Cs(2)   | 59.6(7)   |
| C(138)-C(137)-H(13S) | 109.1     |
| N(11)-C(137)-H(13S)  | 109.1     |
| Cs(2)-C(137)-H(13S)  | 164.4     |
| C(138)-C(137)-H(13T) | 109.1     |

|                      |           |
|----------------------|-----------|
| N(11)-C(137)-H(13T)  | 109.1     |
| Cs(2)-C(137)-H(13T)  | 69.4      |
| H(13S)-C(137)-H(13T) | 107.8     |
| O(23)-C(138)-C(137)  | 109.6(13) |
| O(23)-C(138)-Cs(2)   | 40.5(6)   |
| C(137)-C(138)-Cs(2)  | 71.2(9)   |
| O(23)-C(138)-H(13U)  | 109.8     |
| C(137)-C(138)-H(13U) | 109.8     |
| Cs(2)-C(138)-H(13U)  | 112.0     |
| O(23)-C(138)-H(13V)  | 109.8     |
| C(137)-C(138)-H(13V) | 109.8     |
| Cs(2)-C(138)-H(13V)  | 136.6     |
| H(13U)-C(138)-H(13V) | 108.2     |
| O(23)-C(139)-C(140)  | 109.5(11) |
| O(23)-C(139)-Cs(2)   | 41.8(6)   |
| C(140)-C(139)-Cs(2)  | 75.1(8)   |
| O(23)-C(139)-H(13W)  | 109.8     |
| C(140)-C(139)-H(13W) | 109.8     |
| Cs(2)-C(139)-H(13W)  | 146.0     |
| O(23)-C(139)-H(13X)  | 109.8     |
| C(140)-C(139)-H(13X) | 109.8     |
| Cs(2)-C(139)-H(13X)  | 100.9     |
| H(13W)-C(139)-H(13X) | 108.2     |
| O(24)-C(140)-C(139)  | 108.9(11) |
| O(24)-C(140)-Cs(2)   | 47.5(6)   |
| C(139)-C(140)-Cs(2)  | 83.1(8)   |
| O(24)-C(140)-H(14C)  | 109.9     |
| C(139)-C(140)-H(14C) | 109.9     |
| Cs(2)-C(140)-H(14C)  | 157.4     |
| O(24)-C(140)-H(14D)  | 109.9     |
| C(139)-C(140)-H(14D) | 109.9     |
| Cs(2)-C(140)-H(14D)  | 83.0      |
| H(14C)-C(140)-H(14D) | 108.3     |
| N(12')-C(141)-C(28A) | 112.4(15) |
| O(24)-C(141)-C(142)  | 111.8(6)  |
| N(12')-C(141)-Cs(2') | 65.7(8)   |
| C(28A)-C(141)-Cs(2') | 91.3(10)  |
| O(24)-C(141)-Cs(2)   | 46.2(3)   |
| C(142)-C(141)-Cs(2)  | 67.8(5)   |
| O(24)-C(141)-H(14E)  | 109.3     |
| C(142)-C(141)-H(14E) | 109.3     |
| Cs(2)-C(141)-H(14E)  | 111.8     |
| O(24)-C(141)-H(14F)  | 109.3     |
| C(142)-C(141)-H(14F) | 109.3     |
| Cs(2)-C(141)-H(14F)  | 138.6     |
| H(14E)-C(141)-H(14F) | 107.9     |
| N(12')-C(141)-H(14G) | 109.1     |
| C(28A)-C(141)-H(14G) | 109.1     |
| Cs(2')-C(141)-H(14G) | 158.9     |
| N(12')-C(141)-H(14H) | 109.1     |
| C(28A)-C(141)-H(14H) | 109.1     |
| Cs(2')-C(141)-H(14H) | 58.6      |
| H(14G)-C(141)-H(14H) | 107.9     |
| N(12)-C(142)-C(141)  | 113.5(8)  |
| N(12)-C(142)-Cs(2)   | 66.3(5)   |
| C(141)-C(142)-Cs(2)  | 88.9(5)   |
| N(12)-C(142)-H(14I)  | 108.9     |
| C(141)-C(142)-H(14I) | 108.9     |
| Cs(2)-C(142)-H(14I)  | 161.5     |
| N(12)-C(142)-H(14J)  | 108.9     |
| C(141)-C(142)-H(14J) | 108.9     |
| Cs(2)-C(142)-H(14J)  | 60.2      |

|                      |           |
|----------------------|-----------|
| H(14I)-C(142)-H(14J) | 107.7     |
| C(2S)-C(1S)-C(6S)    | 119.0(10) |
| C(2S)-C(1S)-C(7S)    | 120.5(8)  |
| C(6S)-C(1S)-C(7S)    | 120.5(9)  |
| C(1S)-C(2S)-C(3S)    | 120.7(9)  |
| C(1S)-C(2S)-H(2S)    | 119.7     |
| C(3S)-C(2S)-H(2S)    | 119.7     |
| C(2S)-C(3S)-C(4S)    | 120.7(9)  |
| C(2S)-C(3S)-H(3S)    | 119.6     |
| C(4S)-C(3S)-H(3S)    | 119.6     |
| C(5S)-C(4S)-C(3S)    | 117.6(10) |
| C(5S)-C(4S)-H(4S)    | 121.2     |
| C(3S)-C(4S)-H(4S)    | 121.2     |
| C(4S)-C(5S)-C(6S)    | 121.7(10) |
| C(4S)-C(5S)-H(5S)    | 119.2     |
| C(6S)-C(5S)-H(5S)    | 119.2     |
| C(1S)-C(6S)-C(5S)    | 120.2(10) |
| C(1S)-C(6S)-H(6S)    | 119.9     |
| C(5S)-C(6S)-H(6S)    | 119.9     |
| C(1S)-C(7S)-H(7SA)   | 109.5     |
| C(1S)-C(7S)-H(7SB)   | 109.5     |
| H(7SA)-C(7S)-H(7SB)  | 109.5     |
| C(1S)-C(7S)-H(7SC)   | 109.5     |
| H(7SA)-C(7S)-H(7SC)  | 109.5     |
| H(7SB)-C(7S)-H(7SC)  | 109.5     |
| C(13')-C(8S)-C(9')   | 130.1(13) |
| C(13S)-C(8S)-C(9S)   | 109.2(13) |
| C(13S)-C(8S)-C(14S)  | 127.0(18) |
| C(9S)-C(8S)-C(14S)   | 123.5(18) |
| C(13')-C(8S)-H(8S)   | 114.9     |
| C(9')-C(8S)-H(8S)    | 114.9     |
| C(10')-C(9')-C(8S)   | 112.2(15) |
| C(10')-C(9')-H(9')   | 123.9     |
| C(8S)-C(9')-H(9')    | 123.9     |
| C(10S)-C(9S)-C(8S)   | 129.2(19) |
| C(10S)-C(9S)-H(9S)   | 115.4     |
| C(8S)-C(9S)-H(9S)    | 115.4     |
| C(9')-C(10')-C(11')  | 122.4(18) |
| C(9')-C(10')-H(10')  | 118.8     |
| C(11')-C(10')-H(10') | 118.8     |
| C(11S)-C(10S)-C(9S)  | 117(2)    |
| C(11S)-C(10S)-H(1)   | 121.6     |
| C(9S)-C(10S)-H(1)    | 121.6     |
| C(12')-C(11')-C(10') | 120.5(19) |
| C(12')-C(11')-H(11') | 119.7     |
| C(10')-C(11')-H(11') | 119.7     |
| C(10S)-C(11S)-C(12S) | 119(2)    |
| C(10S)-C(11S)-H(6)   | 120.6     |
| C(12S)-C(11S)-H(6)   | 120.6     |
| C(11')-C(12')-C(13') | 121.1(18) |
| C(11')-C(12')-H(12') | 119.4     |
| C(13')-C(12')-H(12') | 119.4     |
| C(11S)-C(12S)-C(13S) | 120(2)    |
| C(11S)-C(12S)-H(12Z) | 120.0     |
| C(13S)-C(12S)-H(12Z) | 120.0     |
| C(8S)-C(13')-C(12')  | 112.9(14) |
| C(8S)-C(13')-C(14')  | 121.8(17) |
| C(12')-C(13')-C(14') | 125.2(16) |
| C(8S)-C(13S)-C(12S)  | 125.9(18) |
| C(8S)-C(13S)-H(13Y)  | 117.1     |
| C(12S)-C(13S)-H(13Y) | 117.1     |
| C(13')-C(14')-H(14K) | 109.5     |

|                      |          |
|----------------------|----------|
| C(13')-C(14')-H(14L) | 109.5    |
| H(14K)-C(14')-H(14L) | 109.5    |
| C(13')-C(14')-H(14M) | 109.5    |
| H(14K)-C(14')-H(14M) | 109.5    |
| H(14L)-C(14')-H(14M) | 109.5    |
| C(8S)-C(14S)-H(14N)  | 109.5    |
| C(8S)-C(14S)-H(14O)  | 109.5    |
| H(14N)-C(14S)-H(14O) | 109.5    |
| C(8S)-C(14S)-H(14P)  | 109.5    |
| H(14N)-C(14S)-H(14P) | 109.5    |
| H(14O)-C(14S)-H(14P) | 109.5    |
| C(16S)-C(15S)-C(20S) | 117.3(7) |
| C(16S)-C(15S)-C(21S) | 119.9(8) |
| C(20S)-C(15S)-C(21S) | 122.8(7) |
| C(17S)-C(16S)-C(15S) | 121.4(9) |
| C(17S)-C(16S)-H(16S) | 119.3    |
| C(15S)-C(16S)-H(16S) | 119.3    |
| C(18S)-C(17S)-C(16S) | 121.0(9) |
| C(18S)-C(17S)-H(17S) | 119.5    |
| C(16S)-C(17S)-H(17S) | 119.5    |
| C(17S)-C(18S)-C(19S) | 119.5(9) |
| C(17S)-C(18S)-H(18S) | 120.3    |
| C(19S)-C(18S)-H(18S) | 120.3    |
| C(20S)-C(19S)-C(18S) | 119.1(9) |
| C(20S)-C(19S)-H(19S) | 120.4    |
| C(18S)-C(19S)-H(19S) | 120.4    |
| C(19S)-C(20S)-C(15S) | 121.7(8) |
| C(19S)-C(20S)-H(20S) | 119.2    |
| C(15S)-C(20S)-H(20S) | 119.2    |
| C(15S)-C(21S)-H(21F) | 109.5    |
| C(15S)-C(21S)-H(21G) | 109.5    |
| H(21F)-C(21S)-H(21G) | 109.5    |
| C(15S)-C(21S)-H(21H) | 109.5    |
| H(21F)-C(21S)-H(21H) | 109.5    |
| H(21G)-C(21S)-H(21H) | 109.5    |

---

Symmetry transformations used to generate equivalent atoms:

#1 -x+1,-y+1,-z+1 #2 -x,-y,-z+1

### Theoretical calculations.

Optimization of the molecular structures was performed using the PBE exchange-correlation functional<sup>3</sup> and with the extended basis set Cu: [9s9p8d/5s5p4d], O,N,C : [5s5p2d/3s3p2d], H :[5s1p/3s1p] for valence electrons and the SBK pseudopotential<sup>4</sup> implemented in the PRIRODA package<sup>5</sup>. The Hirschfeld method<sup>6</sup> was used to calculate atomic charges. All quantum chemical calculations were performed using the computing capabilities of the Joint supercomputer center of the National Research Center "Kurchatov Institute".

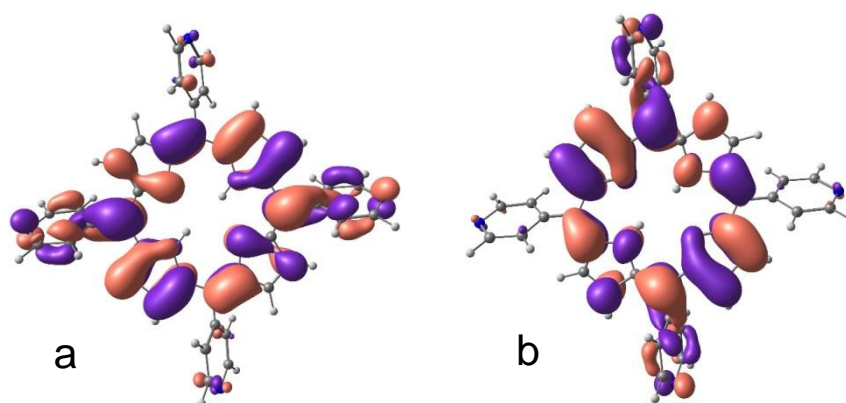

**Fig. S22.** Structure of  $\alpha$ -orbitals for  $\text{H}_2\text{TPyP}^{\bullet-}$  radical anions: (a) HOMO; (b) LUMO. To elucidate the regions with small degree of localization the small value 0.02 for contour plots was used.

## References:

1. (a) M. Llunell, D. Casanova, J. Cirera, P. Alemany and S. Alvarez. Program SHAPE, University of Barcelona, Spain (version 2.1, March 2013); (b) M. Pinsky and D. Avnir, Continuous Symmetry Measures. 5. The Classical Polyhedra, *Inorg Chem.* **1998**, *37*, 5575 – 5582.
2. S. Stoll, A. Schweiger, EasySpin, a comprehensive software package for spectral simulation and analysis in EPR, *J. Mag. Res.*, 2006, *178*, 42 – 55.
3. J. P. Perdew, K. Burke, M. Ernzerhof, Generalized gradient approximation made simple. *Phys. Rev. Lett.* **1996**, *77*, 3865 – 3868.
4. W. J. Stevens, H. Basch, M. Krauss, Compact effective potentials and efficient shared - exponent basis sets for the first- and second- row atoms, *J. Chem. Phys.*, **1984**, *81*, 6026
5. D. N. Laikov, Fast evaluation of density functional exchange-correlation terms using the expansion of the electron density in auxiliary basis sets, *Chem. Phys. Lett.*, **1997**, *281*, 151 – 156.
6. F. L. Hirshfeld, Bonded-atom fragments for describing molecular charge densities, *Theor. Chim. Acta* **1977**, *44*, 129 – 138.

## Cartesian coordinate of the structures optimized

The [ $\text{Cu}^{\text{II}}\text{TPyP}$ ] $^-$  anion ( $S = 1$ )

|   |             |             |             |
|---|-------------|-------------|-------------|
| 7 | -1.44282242 | -1.43504474 | -0.04562011 |
| 6 | -2.79685366 | -1.23098003 | -0.30607863 |
| 6 | -3.47376937 | -2.49219427 | -0.40082073 |
| 1 | -4.52735089 | -2.62736249 | -0.62471251 |
| 6 | -2.53154963 | -3.46889656 | -0.19416449 |
| 1 | -2.67871613 | -4.54308133 | -0.22597009 |
| 6 | -1.27381992 | -2.80206078 | 0.03813500  |
| 7 | 7.69879248  | -0.00216048 | 1.23243762  |
| 6 | 7.17880631  | 0.32143451  | 0.03412364  |
| 1 | 7.90058155  | 0.58376006  | -0.74637713 |
| 6 | 5.80891224  | 0.33429667  | -0.24863636 |
| 1 | 5.45254521  | 0.60529954  | -1.24360404 |
| 6 | 4.89113452  | -0.00935652 | 0.75903395  |
| 6 | 5.42933115  | -0.34677949 | 2.01304946  |
| 1 | 4.76788056  | -0.61721175 | 2.83748789  |
| 6 | 6.81618729  | -0.32791114 | 2.19465037  |
| 1 | 7.24342148  | -0.58677309 | 3.16902212  |
| 7 | -1.39609921 | 1.45062446  | -0.30581777 |
| 6 | -1.19469703 | 2.81335460  | -0.38358831 |
| 6 | -2.44595360 | 3.48084637  | -0.65375950 |
| 1 | -2.57384417 | 4.54897183  | -0.79205688 |
| 6 | -3.41509395 | 2.51183271  | -0.71455657 |
| 1 | -4.47752090 | 2.65087163  | -0.88809091 |
| 6 | -2.76028157 | 1.25080558  | -0.51036750 |
| 7 | 1.44355855  | 1.43538394  | 0.04050311  |
| 6 | 2.79756648  | 1.23167765  | 0.30087872  |
| 6 | 3.47538823  | 2.49311478  | 0.38882052  |
| 1 | 4.52919331  | 2.62891119  | 0.61119669  |
| 6 | 2.53375658  | 3.46927603  | 0.17751444  |
| 1 | 2.68216015  | 4.54343131  | 0.20369184  |
| 6 | 1.27512173  | 2.80178901  | -0.04967964 |
| 7 | -7.70514293 | -0.00003243 | -1.19634751 |
| 6 | -7.17449368 | -0.32690217 | -0.00355784 |
| 1 | -7.88923854 | -0.59326777 | 0.78201862  |
| 6 | -5.80228597 | -0.33875891 | 0.26753535  |
| 1 | -5.43710378 | -0.61359286 | 1.25823270  |
| 6 | -4.89343642 | 0.01022935  | -0.74642933 |
| 6 | -5.44279103 | 0.35184900  | -1.99448667 |
| 1 | -4.78871379 | 0.62629409  | -2.82347812 |
| 6 | -6.83108699 | 0.33074170  | -2.16466059 |
| 1 | -7.26680891 | 0.59213506  | -3.13459333 |
| 7 | -0.11887066 | -7.81863678 | 0.55174601  |

|    |             |             |             |
|----|-------------|-------------|-------------|
| 6  | 0.07329743  | 4.95827915  | -0.37050172 |
| 6  | -0.69691820 | 5.78733026  | 0.47394469  |
| 1  | -1.32792384 | 5.34434156  | 1.24587878  |
| 6  | -0.63710020 | 7.17540363  | 0.33412035  |
| 1  | -1.23033665 | 7.81439296  | 0.99723058  |
| 7  | 0.12397094  | 7.81731449  | -0.57430866 |
| 6  | 0.86098276  | 7.02657684  | -1.37973904 |
| 1  | 1.47527632  | 7.54385294  | -2.12470895 |
| 6  | 0.87207662  | 5.63166497  | -1.32029315 |
| 1  | 1.48822697  | 5.06124584  | -2.01700574 |
| 6  | 0.04945124  | 3.47972726  | -0.26715817 |
| 6  | 3.41790630  | -0.01058196 | 0.50987020  |
| 6  | -0.86316321 | -7.03131788 | 1.35382005  |
| 1  | -1.48239751 | -7.55163014 | 2.09257143  |
| 6  | -3.41844903 | 0.01183377  | -0.50815083 |
| 6  | 0.70721991  | -5.78428422 | -0.48391835 |
| 1  | 1.34360044  | -5.33805173 | -1.24953840 |
| 6  | 2.44477558  | -3.47927174 | 0.65861826  |
| 1  | 2.57243121  | -4.54709535 | 0.79951769  |
| 6  | 1.19493749  | -2.81271515 | 0.38029959  |
| 7  | 1.39624422  | -1.44998200 | 0.30172037  |
| 6  | 2.75936134  | -1.24943815 | 0.51283652  |
| 6  | 3.41324432  | -2.50976921 | 0.72364198  |
| 1  | 4.47461752  | -2.64824490 | 0.90394620  |
| 6  | -0.04833751 | -3.47992345 | 0.25742668  |
| 6  | -0.07094774 | -4.95869720 | 0.35683183  |
| 6  | 0.64835233  | -7.17279384 | -0.34878020 |
| 1  | 1.24771270  | -7.80892221 | -1.00911942 |
| 6  | -0.87593087 | -5.63626543 | 1.29845540  |
| 1  | -1.49833014 | -5.06903879 | 1.99219162  |
| 29 | 0.00015662  | 0.00013221  | -0.00232306 |

The  $[\{H_2TPyP\}^-]$  radical anion ( $S = 1/2$ )

|   |             |             |             |
|---|-------------|-------------|-------------|
| 7 | -1.49887219 | -1.52958679 | 0.02914193  |
| 1 | -0.74396572 | -0.84768250 | 0.13671621  |
| 6 | -2.82143074 | -1.24707456 | -0.28021394 |
| 6 | -3.48231061 | -2.50151658 | -0.41408179 |
| 1 | -4.52755801 | -2.62901605 | -0.67422149 |
| 6 | -2.55159659 | -3.50881991 | -0.19548799 |
| 1 | -2.72386585 | -4.57747372 | -0.25610603 |
| 6 | -1.29398026 | -2.89337185 | 0.08296989  |
| 7 | 7.68922647  | -0.02795557 | 1.16852944  |
| 6 | 7.15359535  | 0.34531597  | -0.00937442 |
| 1 | 7.86533893  | 0.64528600  | -0.78551532 |
| 6 | 5.78160730  | 0.36197611  | -0.27689121 |

|   |             |             |             |
|---|-------------|-------------|-------------|
| 1 | 5.41503767  | 0.67336415  | -1.25626253 |
| 6 | 4.87391182  | -0.03565247 | 0.72157375  |
| 6 | 5.42937319  | -0.41944892 | 1.95589717  |
| 1 | 4.77899406  | -0.72768946 | 2.77569572  |
| 6 | 6.81784416  | -0.40065756 | 2.12335844  |
| 1 | 7.25589827  | -0.69867417 | 3.08172895  |
| 7 | -1.38126872 | 1.49396726  | -0.31301036 |
| 6 | -1.20436717 | 2.84870293  | -0.40110840 |
| 6 | -2.47350861 | 3.51889196  | -0.67979945 |
| 1 | -2.62014207 | 4.58359194  | -0.83234339 |
| 6 | -3.42367385 | 2.54221839  | -0.73585787 |
| 1 | -4.48713792 | 2.67369350  | -0.91158658 |
| 6 | -2.73262697 | 1.27780308  | -0.51552524 |
| 7 | 1.49743754  | 1.52962853  | -0.02650343 |
| 1 | 0.74393311  | 0.84752440  | -0.14193941 |
| 6 | 2.82308612  | 1.24627442  | 0.26788653  |
| 6 | 3.48561887  | 2.50043547  | 0.39723477  |
| 1 | 4.53202658  | 2.62698018  | 0.65318269  |
| 6 | 2.55415819  | 3.50827353  | 0.18469482  |
| 1 | 2.72607222  | 4.57690570  | 0.24726513  |
| 6 | 1.29442428  | 2.89337382  | -0.08600906 |
| 7 | -7.68222650 | 0.02594883  | -1.21317405 |
| 6 | -7.15529716 | -0.35029193 | -0.03223512 |
| 1 | -7.87266284 | -0.65346502 | 0.73746161  |
| 6 | -5.78536728 | -0.36690493 | 0.24560384  |
| 1 | -5.42606022 | -0.68184596 | 1.22652400  |
| 6 | -4.87035873 | 0.03519879  | -0.74439032 |
| 6 | -5.41671939 | 0.42261468  | -1.98160361 |
| 1 | -4.76039252 | 0.73442814  | -2.79529022 |
| 6 | -6.80379560 | 0.40242274  | -2.16007445 |
| 1 | -7.23472482 | 0.70286843  | -3.12091134 |
| 7 | -0.10051188 | -7.87495047 | 0.60169148  |
| 6 | 0.05236753  | 5.01502108  | -0.38278413 |
| 6 | -0.75516876 | 5.82917784  | 0.44219447  |
| 1 | -1.40820668 | 5.37311790  | 1.18742107  |
| 6 | -0.70019233 | 7.21910234  | 0.32013406  |
| 1 | -1.32420963 | 7.84588836  | 0.96642200  |
| 7 | 0.09129541  | 7.87713550  | -0.54937295 |
| 6 | 0.86644733  | 7.10112015  | -1.33356728 |
| 1 | 1.50666936  | 7.63168526  | -2.04661485 |
| 6 | 0.88635629  | 5.70612999  | -1.28943070 |
| 1 | 1.53206206  | 5.14903671  | -1.96988647 |
| 6 | 0.03817320  | 3.53652492  | -0.29581763 |
| 6 | 3.39833501  | -0.03645090 | 0.48350737  |
| 6 | -0.88530275 | -7.08933690 | 1.36657579  |

|   |             |             |             |
|---|-------------|-------------|-------------|
| 1 | -1.53576907 | -7.61109897 | 2.07687516  |
| 6 | -3.39655924 | 0.03570026  | -0.49588327 |
| 6 | 0.76125932  | -5.83843595 | -0.40077805 |
| 1 | 1.42629371  | -5.39210116 | -1.14121984 |
| 6 | 2.47201257  | -3.51741177 | 0.69397160  |
| 1 | 2.61911206  | -4.58071054 | 0.85525982  |
| 6 | 1.20355850  | -2.84868204 | 0.40890099  |
| 7 | 1.38187490  | -1.49476169 | 0.31034024  |
| 6 | 2.73351753  | -1.27802521 | 0.51124184  |
| 6 | 3.42340353  | -2.54147422 | 0.74034741  |
| 1 | 4.48679546  | -2.67322380 | 0.91606342  |
| 6 | -0.03923993 | -3.53650410 | 0.30393689  |
| 6 | -0.05621674 | -5.01389329 | 0.40418540  |
| 6 | 0.70337012  | -7.22683711 | -0.26401656 |
| 1 | 1.33550362  | -7.86095577 | -0.89505780 |
| 6 | -0.90279186 | -5.69493391 | 1.30714974  |
| 1 | -1.55791244 | -5.13041353 | 1.97226291  |
